# Supplementary material for: Comparing the effectiveness, safety and tolerability of interventions for depressive symptoms in people with multiple sclerosis: a systematic review and network meta-analysis protocol
Source: PubMed Central journal article supplement — BMJ Open. 2022 Jun 9;12(6):e055796. doi: 10.1136/bmjopen-2021-055796 (PMC9185417; doi:10.1136/bmjopen-2021-055796), 2022-06-09
Supplement: bmjopen-2021-055796.draft_revisions.pdf [file bmjopen-2021-055796.draft_revisions.pdf]

# BMJ Open

BMJ Open is committed to open peer review. As part of this commitment we make the peer review history of every article we publish publicly available.

When an article is published we post the peer reviewers' comments and the authors' responses online. We also post the versions of the paper that were used during peer review. These are the versions that the peer review comments apply to.

The versions of the paper that follow are the versions that were submitted during the peer review process. They are not the versions of record or the final published versions. They should not be cited or distributed as the published version of this manuscript.

BMJ Open is an open access journal and the full, final, typeset and author-corrected version of record of the manuscript is available on our site with no access controls, subscription charges or pay-per-view fees (<http://bmjopen.bmj.com>).

If you have any questions on BMJ Open's open peer review process please email [info.bmjopen@bmj.com](mailto:info.bmjopen@bmj.com)

# BMJ Open

## Comparing the effectiveness, safety, and tolerability of interventions for depressive symptoms in people with multiple sclerosis: a systematic review and network meta-analysis protocol

|                               |                                                                                                                                                                                                                                                                                                                                                                                                                                                                                                                                                                                                                                                                                                                                                                                                                                                                                                                                                                                                                                                                                                      |
|-------------------------------|------------------------------------------------------------------------------------------------------------------------------------------------------------------------------------------------------------------------------------------------------------------------------------------------------------------------------------------------------------------------------------------------------------------------------------------------------------------------------------------------------------------------------------------------------------------------------------------------------------------------------------------------------------------------------------------------------------------------------------------------------------------------------------------------------------------------------------------------------------------------------------------------------------------------------------------------------------------------------------------------------------------------------------------------------------------------------------------------------|
| Journal:                      | <i>BMJ Open</i>                                                                                                                                                                                                                                                                                                                                                                                                                                                                                                                                                                                                                                                                                                                                                                                                                                                                                                                                                                                                                                                                                      |
| Manuscript ID                 | bmjopen-2021-055796                                                                                                                                                                                                                                                                                                                                                                                                                                                                                                                                                                                                                                                                                                                                                                                                                                                                                                                                                                                                                                                                                  |
| Article Type:                 | Protocol                                                                                                                                                                                                                                                                                                                                                                                                                                                                                                                                                                                                                                                                                                                                                                                                                                                                                                                                                                                                                                                                                             |
| Date Submitted by the Author: | 23-Jul-2021                                                                                                                                                                                                                                                                                                                                                                                                                                                                                                                                                                                                                                                                                                                                                                                                                                                                                                                                                                                                                                                                                          |
| Complete List of Authors:     | Lyons, Julia; Melbourne School of Population and Global Health, The University of Melbourne, Disability and Health Unit<br>Campese, Stephanie; Melbourne School of Population and Global Health, The University of Melbourne, Disability and Health Unit<br>Learmonth, Yvonne ; Murdoch University, Discipline of Exercise Science & Centre for Molecular Medicine and Innovative Therapeutics, Health Futures Institute; Perron Institute for Neurological and Translational Science<br>Metse, Alexandra; University of Newcastle, School of Psychology; University of the Sunshine Coast, School of Health and Behavioural Sciences<br>Kermode, Allan; Perron Institute for Neurological and Translational Science; Murdoch University, Centre for Molecular Medicine and Innovative Therapeutics, Health Futures Institute<br>Karahalios, Amalia; Melbourne School of Population and Global Health, The University of Melbourne, Centre for Epidemiology and Biostatistics<br>Marck, C; Melbourne School of Population and Global Health, The University of Melbourne, Disability and Health Unit |
| Keywords:                     | Multiple sclerosis < NEUROLOGY, MENTAL HEALTH, Depression & mood disorders < PSYCHIATRY                                                                                                                                                                                                                                                                                                                                                                                                                                                                                                                                                                                                                                                                                                                                                                                                                                                                                                                                                                                                              |
|                               |                                                                                                                                                                                                                                                                                                                                                                                                                                                                                                                                                                                                                                                                                                                                                                                                                                                                                                                                                                                                                                                                                                      |

SCHOLARONE™  
Manuscripts

1  
2  
3 **Title: Comparing the effectiveness, safety, and tolerability of interventions for depressive**  
4 **symptoms in people with multiple sclerosis: a systematic review and network meta-**  
5 **analysis protocol**  
6  
7  
8  
9

10  
11 Julia Lyons <sup>a</sup>, Stephanie Campese <sup>a</sup>, Yvonne C Learmonth <sup>b,c</sup>, Alexandra Metse <sup>e, f</sup>, Allan G.  
12  
13 Kermode <sup>c,d</sup>, Amalia Karahalios <sup>g\*</sup>, Claudia H Marck <sup>a\*</sup>  
14  
15

16  
17 \*Shared last author  
18

19 Full affiliation(s):  
20

21 <sup>a</sup> Disability and Health Unit, The Melbourne School of Population and Global Health, The  
22 University of Melbourne, Victoria, Australia  
23

24 <sup>b</sup> Discipline of Exercise Science & Centre for Molecular Medicine and Innovative  
25 Therapeutics, Health Futures Institute, Murdoch University, Murdoch, Western Australia,  
26  
27  
28 Australia  
29

30 <sup>c</sup> Perron Institute for Neurological and Translational Science, Perth, Western Australia,  
31  
32 Australia  
33

34 <sup>d</sup> Centre for Molecular Medicine and Innovative Therapeutics, Health Futures Institute,  
35 Murdoch University, Murdoch, Western Australia, Australia  
36

37 <sup>e</sup> School of Health and Behavioural Sciences, University of the Sunshine Coast, Sippy Downs,  
38  
39 Queensland, Australia  
40

41 <sup>f</sup> School of Psychology, University of Newcastle, Callaghan, New South Wales, Australia  
42

43 <sup>g</sup> Centre for Epidemiology and Biostatistics, The Melbourne School of Population and Global  
44  
45 Health, The University of Melbourne, Australia  
46

47 Corresponding author:  
48

49 Dr Amalia Karahalios  
50

51 The Melbourne School of Population and Global Health,  
52

53 The University of Melbourne,  
54

55 Parkville 3010, Victoria, Australia  
56

57 [emily.karahalios@unimelb.edu.au](mailto:emily.karahalios@unimelb.edu.au)  
58  
59  
60

1  
2  
3 **Word count: 3221**  
4

5 **ABSTRACT**  
6

7 **Background**  
8

9  
10 Comorbid depression is prevalent in people with multiple sclerosis (MS). Depression is  
11 commonly untreated or undertreated and there is a need for effective and safe interventions.  
12  
13 Guidelines for depression management in people with MS recommend psychological and  
14  
15 pharmaceutical interventions, however current research suggests other interventions such as  
16  
17 exercise could also be effective. The comparative efficacy and safety between intervention  
18  
19 modalities have not been established in the literature.  
20  
21  
22

23 **Objective:**  
24

25  
26 To outline a protocol for a systematic review and network meta-analysis to compare efficacy  
27  
28 and safety of psychological, pharmaceutical, physical, and magnetic stimulation interventions  
29  
30 for depression in people with MS.  
31  
32

33 **Methods and analysis:**  
34

35 We will search seven key databases using a search strategy developed for this protocol with  
36  
37 search terms revolving around three concepts: MS, depression, and randomised controlled  
38  
39 trials. Included trials will be randomised controlled trials with depression as the primary  
40  
41 outcome, only outcome, or secondary outcome with *a priori* power calculation with a  
42  
43 population of people with MS using an aforementioned intervention type will be included.  
44  
45 Screening, data extraction, and risk of bias assessment (using the Risk of Bias 2 tool) will be  
46  
47 conducted by two independent reviewers. We will generate descriptive statistics and provide a  
48  
49 narrative synthesis of the included trials. We will use a frequentist multivariate random effects  
50  
51 model in a network meta-analysis where efficacy will be measured using a standardised mean  
52  
53  
54  
55  
56  
57  
58  
59  
60

1  
2  
3 difference and safety using an odds ratio. If possible, we will provide summary measures  
4 including a geometry of the network, surface under the cumulative ranking curve, and a  
5 league table. Sub-group analysis will be performed if possible, using pre-planned variables.  
6  
7

8  
9  
10 **Ethics and dissemination:**

11  
12 Ethical approval is not necessary for this type of study. Results of the systematic review and  
13 network meta-analysis will be published in a peer reviewed journal.  
14

15  
16  
17 **Review registration:**

18  
19 PROSPERO registration number CRD42020209803.  
20  
21

22  
23  
24 **STRENGTHS AND LIMITATIONS OF THIS STUDY:**

- 25  
26 • This will be the first systematic review and network meta-analysis to identify the  
27 comparative efficacy, safety, and tolerability of interventions for depression in people with  
28 MS.  
29  
30  
31  
32  
33 • Eligibility criteria include randomised controlled trials which are limited to depression as the  
34 primary outcome, only outcome, or secondary outcome with a power analysis.  
35  
36  
37  
38 • The review will include multiple intervention types which are used in both clinical and  
39 research settings.  
40  
41  
42  
43 • To meet the transitivity assumption, trials including participants with treatment  
44 resistant/refractory depression must be excluded.  
45

46  
47 **KEYWORDS:** multiple sclerosis, depression, network meta-analysis, systematic review,  
48  
49

50  
51 **ARTICLE TYPE:** protocol  
52  
53  
54  
55  
56  
57  
58  
59  
60

## INTRODUCTION:

Multiple Sclerosis (MS) is a chronic, immune mediated and neurodegenerative disease characterised by the formation of destructive lesions predominantly involving myelinated axons within in the central nervous system <sup>1</sup>. There are a broad range of symptoms attributed to the multifocal lesions distinctive of MS including depression, pain, fatigue, impaired gait, incontinence, impaired vision, and spasticity <sup>2</sup>. Depression can be particularly burdensome, and affects up to 50% of people with MS <sup>3</sup>. Depressive symptoms in people with MS are reported to impact adherence to disease modifying therapies <sup>4</sup>, increase pain sensitivity <sup>2</sup>, and reduce participation in work and poor health related quality of life <sup>5</sup>. Major depressive disorder (MDD), the most commonly diagnosed depressive disorder, according to the Diagnostic and Statistical Manual of Mental Disorders (DSM-5) is defined as experiencing a minimum of five symptoms including depressed mood or lack of pleasure, feelings of worthlessness/guilt, fatigue, appetite or weight changes, psychomotor agitation, diminished concentration, feelings of worthlessness/guilt, suicidality and sleep difficulties within a period of two-weeks <sup>6</sup>. Depressive symptoms which do not meet the definition of MDD are even more prevalent in people with MS, and commonly still require treatment <sup>7</sup>. Furthermore, people with MS who have moderate-to-severe depressive symptoms have been reportedly underdiagnosed and undertreated <sup>8,9</sup>. The aetiology of depression and depressive symptoms in people with MS is not yet fully understood but <sup>10</sup> but due to the multitude of effects, safe and effective interventions are required.

Guidelines for treating depression in people with MS suggest that a combination of psychological and pharmaceutical interventions is the most effective two-pronged therapy <sup>11</sup>

1  
2  
3 12. Further, the American Association of Neurology review to inform guidelines in 2014<sup>13</sup>  
4  
5 point out the scarcity of trials to treat depression in people with MS, and therefore a lack of  
6  
7 strong evidence. Following this pivotal review<sup>13</sup> a number of studies have sought to address  
8  
9 the dearth in literature. Some interventions, such as mindfulness-based interventions<sup>14</sup> and  
10  
11 Pilates<sup>15</sup> have not been included in these guidelines. Further, recent systematic reviews  
12  
13 reported that exercise<sup>16 17</sup> and mindfulness-based interventions<sup>18</sup>, compared to waitlist/usual  
14  
15 care, have a moderate effect at reducing depressive symptoms in people with MS. However,  
16  
17 it is unclear how these interventions compare in terms of efficacy and safety. Network meta-  
18  
19 analysis enables the comparison of multiple interventions by combining the direct and indirect  
20  
21 evidence without the need for several analyses<sup>19</sup>. Synthesising the evidence in this manner  
22  
23 will enable a comprehensive understanding of how interventions compare, which should  
24  
25 greatly enhance evidence-based decision making for people with MS and their clinicians on  
26  
27 how best to manage depressive symptoms.  
28  
29  
30  
31  
32  
33

34  
35 This article outlines the protocol for a systematic review and network meta-analysis to  
36  
37 compare the effectiveness and safety of intervention modalities, or combination of modalities,  
38  
39 in reducing depressive symptoms in adults with MS. This review is the first stage of a larger  
40  
41 project that aims to provide guidance for public health researchers on the design and analysis  
42  
43 of network meta-analysis studies in MS.  
44  
45  
46

## 47 **METHODS**

48  
49  
50

51 This systematic review protocol is registered with The International Prospective Register of  
52  
53 Systematic Reviews (PROSPERO) (CRD42020209803) and adheres to the Preferred  
54  
55 Reporting Items for Systematic Reviews and Meta-Analyses extension for Network Meta-  
56  
57  
58  
59  
60

1  
2  
3 Analysis (PRISMA NMA) statement <sup>20</sup>, see supplementary file 1 for checklist.  
4  
5

## 6 7 **Eligibility criteria**

### 8 9 **Participants**

10  
11  
12  
13 Adults (aged 18 years or older) of any gender who have been diagnosed with any type of MS.  
14  
15

### 16 17 **Interventions**

18  
19  
20 We will include interventions that aim to alleviate depressive symptoms in people with MS,  
21  
22 including:  
23  
24

25  
26  
27 *Psychological interventions* will be delivered with the intention of treating depressive  
28  
29 symptoms, informed by psychological theories or principle(s) and a) implemented by a  
30  
31 psychiatrist/psychologist or other mental health clinician or b) manualized, with content  
32  
33 developed by a mental health clinician or researcher, e.g. online/app or web-based  
34  
35 intervention.  
36  
37

38  
39  
40 *Pharmaceutical interventions* will be delivered with the intention involve the use of  
41  
42 medication or drugs for the intention of treating depressive symptoms at a therapeutic dose  
43  
44 according to the manufacturer guidelines (if available).  
45  
46

47  
48  
49 *Physical interventions* including physiotherapy and physical activity (any bodily movement  
50  
51 that results in energy expenditure) including exercise, aimed at treating depressive symptoms.  
52

53 Subtypes of physical activity will be included.  
54  
55  
56  
57  
58  
59  
60



1  
2  
3 *Electromagnetic stimulations* involve the use of targeted electromagnetic stimulation to  
4 stimulate areas of the brain to reduce depressive symptoms. Subtypes include transcranial  
5 magnetic stimulation, and transcranial direct current stimulation.  
6  
7  
8  
9

10  
11 Combinations of the above-mentioned intervention modalities will be included and will form  
12 new categories. Any interventions that are specific to people with treatment resistant  
13 depression/refractory depression will not be included (e.g. electroconvulsive therapy). This is  
14 because participants who have treatment resistant depression will have previously participated  
15 in first step methods such as cognitive behavioural therapy and to satisfy the transitivity  
16 assumption <sup>19</sup> (i.e., a participant who does not have treatment resistant depression would not  
17 be eligible to be randomised to an intervention such as electroconvulsive therapy).  
18  
19  
20  
21  
22  
23  
24  
25  
26  
27  
28

29 Grouping of interventions will depend on the eligible trials. The four broad categories will be  
30 split into smaller sub-categories, e.g. psychological interventions could have a sub-category of  
31 mindfulness-based interventions, similarly pharmaceutical interventions could have a sub-  
32 category of serotonin reuptake inhibitors.  
33  
34  
35  
36  
37  
38  
39

#### 40 Comparator

41  
42  
43 We will consider the following comparators: any intervention modality included in the above  
44 list, placebo, wait-list control, treatment as usual, or no treatment. Classification of comparator  
45 groups will depend on the type of comparator the author of the RCT has employed. Common  
46 types of comparators can include, but not limited to, placebo, wait-list control, treatment as  
47 usual, and no treatment control. These comparator groups do not have similar methodology  
48 and can influence participant outcome in altering ways. Therefore, for this protocol and  
49  
50  
51  
52  
53  
54  
55  
56  
57  
58  
59  
60

1  
2  
3 subsequent systematic review and network meta-analysis, we will adopt the recommended  
4 framework for classification of comparator groups <sup>21</sup>. The groups will be (1) minimal  
5 treatment control, active control, or similar; (2) wait-list control, treatment as usual, or no  
6 treatment; and (3) pill placebo.  
7  
8  
9  
10  
11  
12

### 13 Outcome

14  
15  
16  
17 We will include studies which specified that depressive symptoms were the primary (or only)  
18 outcome, or as a secondary outcome where an a-priori power calculation was provided. The  
19 severity of depressive symptoms must have been measured by a validated self-report  
20 questionnaire or by clinician interview. Although depression and depressive symptoms is  
21 measured and defined differently across studies <sup>22</sup>, we have chosen to accept all types of  
22 standardised measures or clinical interviews. To assess the acute efficacy of the intervention,  
23 depressive symptoms must be measured within two weeks of completion of the intervention.  
24  
25  
26  
27  
28  
29  
30  
31  
32

33 We will also assess the long-term efficacy of the intervention using studies that have  
34 measured depressive symptoms at approximately six months post-intervention (within 4-8  
35 months). Any studies that have measured just one of the aforementioned time points will still  
36 be eligible for inclusion.  
37  
38  
39  
40  
41  
42  
43

44 Safety and tolerability outcomes will include:

- 45  
46  
47  
48 - Frequency of serious adverse events (SAEs) defined as an untoward occurrence of a medical  
49 event that is fatal, life-threatening, requires hospitalization or prolonging of existing  
50 hospitalization and/or persistent disability <sup>23-26</sup>.
- 51  
52  
53  
54 - Frequency of adverse events (AEs) defined as the occurrence of an undesirable event  
55  
56  
57  
58  
59  
60

1  
2  
3 occurring during the study duration even if the event was not considered to be related to the  
4  
5 intervention <sup>23-26</sup>.

6  
7  
8 - Tolerability of the intervention will be assessed as the frequency of participants who  
9  
10 discontinue the study and/or have reduced compliance due to SAE or AEs <sup>23 27</sup>.

11  
12  
13  
14 The events will be measured as dichotomous outcomes during the intervention period and  
15  
16 SAE's and AE's might be combined in analysis if they are rare outcomes of the studies.

## 17 18 19 20 Types of Studies

21  
22  
23  
24 We will include randomised controlled trials, including multi-arm randomised trials. Quasi-  
25  
26 randomised, cluster and cross-over trials will not be included.

## 27 28 29 30 Search strategy

31  
32  
33 We will search the following seven databases: EMBASE, Ovid (Medline), Cochrane  
34  
35 CENTRAL, APA PsycInfo, Web of Science, CINAHL and PEDro. The search strategy was  
36  
37 developed in conjunction with a medical librarian at the University of Melbourne, Australia,  
38  
39 as well as a clinical physiotherapist (YL) who works with people with MS, and a clinical  
40  
41 psychologist (AM). The search terms relate to three main concepts of MS, depression, and  
42  
43 randomised controlled trials. Search strategies for all databases are listed in supplementary file  
44  
45  
46  
47 2. Databases will be searched from inception to present. We will also search the reference lists  
48  
49 of relevant systematic reviews to identify any randomised trials that might have been missed  
50  
51 in the database search. Trials will be limited to those published in English.

## 52 53 54 55 56 Study selection

1  
2  
3 Results from the search strategy will be uploaded to Endnote <sup>28</sup> where duplicates will be  
4 removed. The remaining citations will be uploaded into the software management system  
5  
6 Covidence <sup>29</sup> where any additional duplicates will be removed. Covidence will then be used  
7  
8 for title and abstract screening and full text screening by at least two independent reviewers  
9  
10 with any conflicts resolved by a third reviewer.  
11  
12  
13  
14  
15

## 16 **Data Extraction**

17  
18  
19  
20 Data will be extracted using a data extraction tool developed for this review using Excel  
21  
22 software by at least two independent reviewers, with conflicts resolved by a third reviewer. If  
23  
24 data was missing from the published article the corresponding author will be contacted. We  
25  
26 will not look at other sources of citations such as grey literature, clinical trial registries, or  
27  
28 protocol papers. The extracted data will relate to the following categories:  
29  
30  
31

- 32  
33 - Study characteristics: first author's last name, year of publication, year of baseline  
34  
35 recruitment, method of recruitment, method of randomisation, inclusion criteria (e.g. a  
36  
37 baseline level of depression cut off for inclusion into study).  
38  
39
- 40 - Sample demographics: sample size, number of participants randomised, baseline  
41  
42 characteristics such as diagnosis of MS, age (years), sex, years since diagnosis of MS, level of  
43  
44 disability, and disability tool.  
45  
46
- 47 - Intervention and comparator characteristics: type, frequency of intervention/treatment,  
48  
49 duration of intervention/treatment, and dose of intervention/treatment.  
50  
51
- 52 - Efficacy outcome data: type of outcome measurement scale, mean and standard deviation of  
53  
54 depressive symptom score at baseline, post-intervention, and at six months post-intervention  
55  
56 (if available).  
57  
58  
59  
60

1  
2  
3 - Safety and tolerability data: type and number of all SAEs and AE, number of participants  
4 that discontinue due to an SAE or AE or for other reasons during the intervention reported for  
5 each trial arm (if time-point data is available, this information will be extracted).  
6  
7

8  
9  
10 - Data relating to the risk of bias assessment: randomisation process, allocation concealment,  
11 deviations from intended treatment, baseline characteristics differences, missing outcome  
12 data, appropriateness of outcome measurement, potential influence in outcome assessment,  
13 and selectively reporting results.  
14  
15  
16  
17  
18  
19  
20

### 21 **Risk of bias assessment**

22  
23  
24  
25 We will use the Risk of Bias 2 tool (RoB 2) to assess the risk of bias for each study that meets  
26 the eligibility criteria<sup>30</sup>. This tool evaluates the risk of bias in five key domains:  
27 randomisation process, deviations from intended interventions, missing outcome data,  
28 measurement of the outcome, and selection of the reported result. The RoB 2 tool provides an  
29 overall assessment of the risk of bias in the study using three categories: low risk, some  
30 concerns or high risk of bias. At least two independent reviewers will assess the risk of bias in  
31 each study with any conflicts between judgements resolved by a third reviewer. In this  
32 systematic review and network meta-analysis there will be an inherent difference in the  
33 overall risk of bias between studies due to the type of intervention. Blinding of the participants  
34 to the assigned intervention is difficult in some study designs and interventions. For example,  
35 participants in a two-arm randomised trial that compared exercise to wait-list control will be  
36 aware of the treatment arm they were allocated in the randomisation process, whereas  
37 participants in a pharmaceutical intervention which compared an anti-depressant to placebo  
38 have reasonable doubt as to which intervention they were allocated. Blinding of the outcome  
39  
40  
41  
42  
43  
44  
45  
46  
47  
48  
49  
50  
51  
52  
53  
54  
55  
56  
57  
58  
59  
60

1  
2  
3 assessors can also be difficult in these trials as depressive symptoms are typically measured  
4 using self-reported tools. Despite this inherent difference we have chosen not to deviate from  
5 the protocol of the RoB 2 tool or alter the tool in any way.  
6  
7  
8  
9

## 10 11 **Data synthesis**

12  
13  
14  
15 All analyses will be conducted using Stata version 16.1 using the network package <sup>31</sup>.  
16  
17

### 18 19 Characteristics of the included studies

20  
21  
22  
23 We will generate descriptive statistics for the sample populations to understand the  
24 demographics of the review participants across all eligible trials. These descriptive statistics  
25 will describe key clinical and methodological characteristics such as age, sex, type of MS, and  
26 type of intervention modality.  
27  
28  
29  
30  
31

### 32 33 Outcome data

34  
35  
36  
37 For this network meta-analysis, we will have two primary and two secondary outcomes.  
38  
39

#### 40 41 *Primary outcome:*

- 42  
43  
44  
45 (1) efficacy of intervention(s) at post-intervention using standardised mean difference <sup>32</sup>,  
46  
47 and  
48  
49 (2) safety of interventions (SAEs, AEs and tolerability) using pooled odds ratios at post-  
50  
51 intervention.  
52  
53

#### 54 55 *Secondary outcome:*

1  
2  
3 (1) efficacy of intervention(s) at post-intervention using standardised mean difference at  
4 six months post-intervention (between four and eight months)  
5

6  
7 (2) safety of interventions (SAEs, AEs and tolerability) using pooled odds ratios at six  
8 months post-intervention (between four and eight months)  
9  
10  
11

## 12 13 14 15 Geometry of the network

16  
17  
18 We will generate a network diagram, separately for efficacy and safety, to visualise the  
19 network of intervention modalities. The nodes (or intervention modalities) will represent the  
20 total number of studies in that group; the larger the size of the node the larger the sample size.  
21  
22 The edges of the lines connecting each node will represent the precision of the evidence, i.e.,  
23 the thicker the line the more precise evidence. Figure 1 shows an example of the possible  
24 network structure with the major intervention modalities included.  
25  
26  
27  
28  
29  
30  
31  
32

33  
34 **<insert figure 1 here>**  
35  
36

## 37 38 Pairwise Meta-analysis

39  
40  
41 For each major category of intervention modality (i.e. psychological, pharmaceutical,  
42 physical, electromagnetic stimulation therapies or combination) that is informed by 10 or  
43 more trials in the category we will fit a random effects pairwise meta-analysis. The random  
44 effects model will assume that the underlying intervention effects across the studies are  
45 similar but not identical allowing an estimation of the heterogeneity in the model<sup>33</sup>. This will  
46 be performed for both the efficacy outcome, using the SMD, and the safety outcome, using  
47 odds ratios. Effect sizes will be presented with their corresponding 95% confidence intervals.  
48  
49  
50  
51  
52  
53  
54  
55  
56  
57  
58  
59  
60

1  
2  
3 Heterogeneity will be estimated using the  $I^2$  statistic giving a percentage of variation across  
4 the studies due to heterogeneity <sup>34</sup>.  
5  
6  
7

#### 8 9 Assessment of transitivity in the network 10

11  
12  
13 The transitivity assumption, which underpins the method of a network meta-analysis, states  
14 that any participant in one trial could be equally randomised to any other trial in the network  
15 <sup>19</sup>. Participant characteristics (for example, age, sex, type of MS, level of disability, and years  
16 since diagnosis of MS) might cause the transitivity assumption to be violated <sup>19</sup>. For example,  
17 if participants in a trial comparing pharmacological interventions were eligible for recruitment  
18 if they had severe mobility disability and they would never be eligible for a trial comparing  
19 two physical activity interventions then we would conclude that the transitivity assumption  
20 has potentially been violated. To assess transitivity of the network the inclusion criteria for  
21 participants recruited into each trial will be assessed. If the transitivity assumption is thought  
22 to be violated, we will undertake narrative synthesis of the data (described below) and  
23 possibly pair wise meta-analyses (described above). If we find no reason to suggest that  
24 violation of the transitivity assumption, we will synthesise the available evidence using  
25 network meta-analysis techniques. We will fit a random effects network meta-analysis model  
26 in a frequentist framework and assume a common heterogeneity parameter across the eligible  
27 trials. The random effects model assumes that the variation between studies could be a result  
28 of heterogeneity and not from sampling variation <sup>19 31</sup>.  
29  
30  
31  
32  
33  
34  
35  
36  
37  
38  
39  
40  
41  
42  
43  
44  
45  
46  
47  
48  
49  
50

#### 51 Summary Statistics 52

53  
54  
55 We will present the summary SMDs or ORs for all pairwise comparisons in a league table <sup>35</sup>  
56  
57  
58  
59  
60



1  
2  
3 36. We will use a predictive interval plot to show the grouped intervention modality SMD or  
4 OR in a future trial 35. We will then obtain a hierarchy of the intervention modalities using the  
5  
6 surface under the cumulative ranking curve (SUCRA). SUCRA uses probabilities to  
7  
8 determine which intervention modality is most likely to be the most effective at reducing  
9  
10 depressive symptoms in people with MS. A probability of 1 (or 100%) is indicative of the  
11  
12 stated intervention modality being the most effective intervention modality, conversely, a  
13  
14 probability of 0 (or 0%) is indicative of the stated intervention modality being the least  
15  
16 effective 36.  
17  
18  
19  
20  
21  
22

### 23 Assessment of inconsistency

24  
25  
26  
27 Consistency is a measure of the agreement between direct evidence and indirect evidence. If  
28  
29 inconsistency occurs in a network it may suggest that there is significant heterogeneity and  
30  
31 that the transitivity assumption could be violated 19 33. Using the network meta-analysis  
32  
33 package in Stata a consistency and inconsistency model can be separately applied to assess  
34  
35 whether the direct and indirect evidence are in agreement for each outcome. These models can  
36  
37 provide information to help ascertain if the direct and indirect evidence are in statistical  
38  
39 agreement 37. If there is evidence of inconsistency in the network, we will use a local method  
40  
41 with the side-splitting approach, a technique that divides the evidence within a node and  
42  
43 analyses it separately to identify if the evidence agrees with the network, to identify if there is  
44  
45 a specific modality of interventions that contribute to inconsistency in the network 31 37. This  
46  
47 will enable us to further investigate the possible sources of inconsistency 38.  
48  
49  
50  
51  
52

### 53 Sub-group analysis

1  
2  
3 We will conduct separate sub-group analyses for the efficacy and the safety outcome if there  
4 is substantial heterogeneity and the data allows this.  
5  
6  
7

8  
9 For the efficacy outcome we will assess whether the following characteristics might explain  
10 any of the observed heterogeneity in the model using a sub-group analysis:  
11  
12  
13

- 14  
15 - Year of baseline recruitment; to determine if treatments have become more effective over  
16 time.  
17
- 18  
19 - Severity of depression at baseline (i.e., studies that recruited based on level of depression vs.  
20 studies that did not); to identify whether interventions are efficacious when a level of  
21 depressive symptoms is present.  
22  
23
- 24  
25 - Comparison of self-reported outcome measures vs clinical assessment; to determine if there  
26 is a difference in the efficacy of the treatment due to the measurement of the outcome.  
27  
28
- 29  
30 - Level of disability at enrolment (e.g., as measured by Patient determined disease steps,  
31 Expanded Disability Disease Scale: categorized in mild, moderate severe); to determine if  
32 level of disability is associated with the efficacy of the intervention.  
33  
34
- 35  
36 - Whether the intervention was conducted in a dose according to guidelines that exist for that  
37 type of interventions (e.g., exercise guidelines for people with MS); to determine if a  
38 minimum dose is associated with the efficacy of the intervention.  
39  
40  
41  
42  
43  
44

45 For the safety and tolerability outcome we will assess whether year of baseline recruitment  
46 and level of disability at enrolment might explain any of the observed heterogeneity.  
47  
48  
49

50  
51  
52 Assessment of small study effects  
53  
54  
55

56 We will use the comparison-adjusted<sup>35</sup> and contour-enhanced<sup>39</sup> funnel plots to investigate  
57  
58  
59

1  
2  
3 whether results in imprecise trials differ from those in more precise trials. Network meta-  
4 regression models will be used to investigate associations between study sample size and  
5 effect size <sup>40</sup>.  
6  
7  
8  
9

## 10 11 Narrative synthesis

12  
13  
14  
15 If we are unable to conduct a NMA or meta-analyses we plan to conduct a narrative synthesis  
16 to assess which interventions reported the outcomes of interest and if there were any patterns  
17 relating to specific interventions, or gaps in the literature.  
18  
19  
20  
21  
22

## 23 24 **ETHICS AND DISSEMINATION**

25  
26  
27 Ethical approval is not needed for a systematic review and network meta-analysis as this study  
28 will use aggregated data from already published RCT's. The dissemination of the results of  
29 the systematic review and network meta-analysis will include publishing in a peer reviewed  
30 journals to apprise MS researchers and clinicians, and people with MS. The results of the  
31 systematic review and network meta-analysis have the potential to inform future treatment  
32 guidelines for depression in people with MS. Further, the review may highlight any gaps in  
33 the literature and provide recommendations for the conduct and reporting of future  
34 randomised controlled trials.  
35  
36  
37  
38  
39  
40  
41  
42  
43  
44  
45

## 46 47 **AUTHORS CONTRIBUTIONS**

48  
49  
50  
51 AK and CM conceived the study. AK, CM, JL, SC, YL, AGK and AM contributed to the  
52 study design. JL drafted the manuscript and AK, CM, SC, YL edited the manuscript. All  
53 authors read and approved the final manuscript.  
54  
55  
56  
57  
58  
59  
60

## FUNDING

CHM was funded by an Early Career Fellowship from the National Health and Medical Research Council (ID: 1120014) and a Fellowship from Multiple Sclerosis Research Australia (ID 20-216).

## CONFLICT OF INTEREST

The authors declare no conflict of interest.

## PATIENT AND PUBLIC INVOLVEMENT

Neither patients nor the public were involved in the design, conduct, reporting, or dissemination plans of the research in this article.

## REFERENCES

1. Hunter SF. Overview and diagnosis of multiple sclerosis. *Am J Manag Care* 2016;22(6 Suppl):s141-50. [published Online First: 2016/06/30]
2. Feinstein A, Magalhaes S, Richard JF, et al. The link between multiple sclerosis and depression. *Nat Rev Neurol* 2014;10(9):507-17. doi: 10.1038/nrneurol.2014.139 [published Online First: 2014/08/13]
3. Arnett PA, Barwick FH, Beeney JE. Depression in multiple sclerosis: review and theoretical proposal. *J Int Neuropsychol Soc* 2008;14(5):691-724. doi: 10.1017/s1355617708081174 [published Online First: 2008/09/04]
4. Tarrant M, Oleen-Burkey M, Castelli-Haley J, et al. The impact of comorbid depression on adherence to therapy for multiple sclerosis. *Mult Scler Int* 2011;2011:271321. doi: 10.1155/2011/271321 [published Online First: 2011/11/19]
5. Ploughman M, Wallack EM, Chatterjee T, et al. Under-treated depression negatively impacts lifestyle behaviors, participation and health-related quality of life among older people with multiple sclerosis. *Mult Scler Relat Disord* 2020;40:101919. doi: 10.1016/j.msard.2019.101919 [published Online First: 2020/01/18]
6. American Psychiatric Association. Diagnostic and Statistical Manual of Mental Disorders (DSM-5®). USA: American Psychiatric Association Publishing 2019.
7. Boeschoten RE, Braamse AMJ, Beekman ATF, et al. Prevalence of depression and anxiety in Multiple Sclerosis: A systematic review and meta-analysis. *J Neurol Sci* 2017;372:331-41. doi: 10.1016/j.jns.2016.11.067 [published Online First: 2016/12/27]

- 1
- 2
- 3
- 4 8. Ploughman M, Wallack EM, Chatterjee T, et al. Under-treated depression negatively
- 5 impacts lifestyle behaviors, participation and health-related quality of life among older people
- 6 with multiple sclerosis. *Mult Scler Relat Disord* 2020;40:101919. doi:
- 7 10.1016/j.msard.2019.101919 [published Online First: 2020/01/18]
- 8 9. Grech LB, Haines S, Marck CH, et al. Untreated and under-treated depressive symptoms in
- 9 people with multiple sclerosis in an Australian context: A secondary analysis. *Collegian* 2020
- 10 doi: <https://doi.org/10.1016/j.colegn.2020.02.010>
- 11 10. Feinstein A. Multiple sclerosis and depression. *Mult Scler* 2011;17(11):1276-81. doi:
- 12 10.1177/1352458511417835 [published Online First: 2011/11/08]
- 13 11. Goldman Consensus G. The Goldman Consensus statement on depression in multiple
- 14 sclerosis. *Mult Scler* 2005;11(3):328-37. doi: 10.1191/1352458505ms1162oa [published
- 15 Online First: 2005/06/17]
- 16 12. Toward Optimized Practice (TOP) MS in Depression Working Group. Identification and
- 17 management of depression in multiple sclerosis: Clinical practice guideline. 2015; 2020(15
- 18 May 2020). <http://www.topalbertadoctors.org>.
- 19 13. Minden SL, Feinstein A, Kalb RC, et al. Evidence-based guideline: assessment and
- 20 management of psychiatric disorders in individuals with MS: report of the Guideline
- 21 Development Subcommittee of the American Academy of Neurology. *Neurology*
- 22 2014;82(2):174-81. doi: 10.1212/wnl.0000000000000013 [published Online First:
- 23 2014/01/01]
- 24 14. Kolahkaj B, Zargar F. Effect of Mindfulness-Based Stress Reduction on Anxiety,
- 25 Depression and Stress in Women With Multiple Sclerosis. *Nurs* 2015;4(4):e29655. doi:
- 26 <https://dx.doi.org/10.17795/nmsjournal29655>
- 27 15. Fleming KM, Coote SB, Herring MP. The feasibility of Pilates to improve symptoms of
- 28 anxiety, depression, and fatigue among people with Multiple Sclerosis: An eight-week
- 29 randomized controlled pilot trial. *Psychology of Sport and Exercise* 2019;45:9. doi:
- 30 10.1016/j.psychsport.2019.101573
- 31 16. Dalgas U, Stenager E, Sloth M, et al. The effect of exercise on depressive symptoms in
- 32 multiple sclerosis based on a meta-analysis and critical review of the literature. *Eur J Neurol*
- 33 2015;22(3):443-e34. doi: 10.1111/ene.12576 [published Online First: 2014/10/21]
- 34 17. Ensari I, Motl RW, Pilutti LA. Exercise training improves depressive symptoms in people
- 35 with multiple sclerosis: results of a meta-analysis. *J Psychosom Res* 2014;76(6):465-71. doi:
- 36 10.1016/j.jpsychores.2014.03.014 [published Online First: 2014/05/21]
- 37 18. Simpson R, Simpson S, Ramparsad N, et al. Mindfulness-based interventions for mental
- 38 well-being among people with multiple sclerosis: a systematic review and meta-analysis of
- 39 randomised controlled trials. *J Neurol Neurosurg Psychiatry* 2019;90(9):1051-58. doi:
- 40 10.1136/jnnp-2018-320165 [published Online First: 2019/06/15]
- 41 19. Rouse B, Chaimani A, Li T. Network meta-analysis: an introduction for clinicians. *Intern*
- 42 *Emerg Med* 2017;12(1):103-11. doi: 10.1007/s11739-016-1583-7 [published Online First:
- 43 2016/12/04]
- 44 20. Hutton B, Salanti G, Caldwell DM, et al. The PRISMA extension statement for reporting
- 45 of systematic reviews incorporating network meta-analyses of health care interventions:
- 46 checklist and explanations. *Ann Intern Med* 2015;162(11):777-84. doi: 10.7326/M14-2385
- 47 [published Online First: 2015/06/02]
- 48
- 49
- 50
- 51
- 52
- 53
- 54
- 55
- 56
- 57
- 58
- 59
- 60

21. Gold SM, Enck P, Hasselmann H, et al. Control conditions for randomised trials of behavioural interventions in psychiatry: a decision framework. *The Lancet Psychiatry* 2017;4(9):725-32. doi: [https://doi.org/10.1016/S2215-0366\(17\)30153-0](https://doi.org/10.1016/S2215-0366(17)30153-0)
22. Patten SB. Current perspectives on co-morbid depression and multiple sclerosis. *Expert Review of Neurotherapeutics* 2020;20(8):867-74. doi: 10.1080/14737175.2020.1806062
23. Ioannidis JP, Evans SJ, Gøtzsche PC, et al. Better reporting of harms in randomized trials: an extension of the CONSORT statement. *Ann Intern Med* 2004;141(10):781-8. doi: 10.7326/0003-4819-141-10-200411160-00009 [published Online First: 2004/11/17]
24. Edwards IR, Aronson JK. Adverse drug reactions: definitions, diagnosis, and management. *Lancet* 2000;356(9237):1255-9. doi: 10.1016/s0140-6736(00)02799-9 [published Online First: 2000/11/10]
25. Duggan C, Parry G, McMurrin M, et al. The recording of adverse events from psychological treatments in clinical trials: evidence from a review of NIHR-funded trials. *Trials* 2014;15:335. doi: 10.1186/1745-6215-15-335 [published Online First: 2014/08/28]
26. Ory M, Resnick B, Jordan PJ, et al. Screening, safety, and adverse events in physical activity interventions: collaborative experiences from the behavior change consortium. *Ann Behav Med* 2005;29 Suppl:20-8. doi: 10.1207/s15324796abm2902s\_5 [published Online First: 2005/06/01]
27. Cipriani A, Zhou X, Del Giovane C, et al. Comparative efficacy and tolerability of antidepressants for major depressive disorder in children and adolescents: a network meta-analysis. *The Lancet* 2016;388(10047):881-90. doi: [https://doi.org/10.1016/S0140-6736\(16\)30385-3](https://doi.org/10.1016/S0140-6736(16)30385-3)
28. EndNote [program]. EndNote X9 version: Clarivate, 2013.
29. Veritas Health Innovation. Covidence systematic review software Melbourne, Australia [Available from: [www.covidence.org](http://www.covidence.org)].
30. Sterne JAC SJ, Page MJ, Elbers RG, Blencowe NS, Boutron I, Cates CJ, Cheng H-Y, Corbett MS, Eldridge SM, Hernán MA, Hopewell S, Hróbjartsson A, Junqueira DR, Jüni P, Kirkham JJ, Lasserson T, Li T, McAleenan A, Reeves BC, Shepperd S, Shrier I, Stewart LA, Tilling K, White IR, Whiting PF, Higgins JPT. RoB 2: a revised tool for assessing risk of bias in randomised trials. *BMJ* 2019(366)
31. White IR. Network meta-analysis. *Stata Journal* 2015;15(4):951-85.
32. Higgins JP, Li T, Deeks JJ. Chapter 6: Choosing effect measures and computing estimates of effect. In: Higgins JPT, Thomas J, Chandler J, Cumpston M, Li T, Page MJ, Welch VA (editors). *Cochrane Handbook for Systematic Reviews of Interventions* version 6.0 Cochrane, 2019.
33. Chaimani A, Caldwell DM, Li T, et al. Additional considerations are required when preparing a protocol for a systematic review with multiple interventions. *J Clin Epidemiol* 2017;83:65-74. doi: 10.1016/j.jclinepi.2016.11.015 [published Online First: 2017/01/16]
34. Higgins JPT, Thompson SG, Deeks JJ, et al. Measuring inconsistency in meta-analyses. *BMJ* 2003;327(7414):557-60. doi: 10.1136/bmj.327.7414.557
35. Chaimani A, Higgins JP, Mavridis D, et al. Graphical tools for network meta-analysis in STATA. *PLoS One* 2013;8(10):e76654. doi: 10.1371/journal.pone.0076654 [published Online First: 2013/10/08]
36. Salanti G, Ades AE, Ioannidis JP. Graphical methods and numerical summaries for presenting results from multiple-treatment meta-analysis: an overview and tutorial. *J Clin*

1  
2  
3 *Epidemiol* 2011;64(2):163-71. doi: 10.1016/j.jclinepi.2010.03.016 [published Online First:  
4 2010/08/07]

5 37. White IR, Barrett JK, Jackson D, et al. Consistency and inconsistency in network meta-  
6 analysis: model estimation using multivariate meta-regression. *Res Synth Methods*  
7 2012;3(2):111-25. doi: 10.1002/jrsm.1045 [published Online First: 2012/06/01]

8 38. Dias S, Welton NJ, Caldwell DM, et al. Checking consistency in mixed treatment  
9 comparison meta-analysis. *Stat Med* 2010;29(7-8):932-44. doi: 10.1002/sim.3767 [published  
10 Online First: 2010/03/10]

11 39. Peters JL, Sutton AJ, Jones DR, et al. Contour-enhanced meta-analysis funnel plots help  
12 distinguish publication bias from other causes of asymmetry. *J Clin Epidemiol*  
13 2008;61(10):991-6. doi: 10.1016/j.jclinepi.2007.11.010 [published Online First: 2008/06/10]

14 40. Chaimani A, Salanti G. Using network meta-analysis to evaluate the existence of small-  
15 study effects in a network of interventions. *Res Synth Methods* 2012;3(2):161-76. doi:  
16 10.1002/jrsm.57 [published Online First: 2012/06/01]

17  
18  
19  
20  
21  
22  
23  
24  
25  
26  
27  
28 **FIGURE LEGEND:**

29  
30  
31  
32 Figure 1: The possible network structure for the major categories of interventions. Comparator  
33 group(s) may be split into multiple nodes as outlined in the comparator group section.  
34  
35  
36  
37  
38  
39  
40  
41  
42  
43  
44  
45  
46  
47  
48  
49  
50  
51  
52  
53  
54  
55  
56  
57  
58  
59  
60

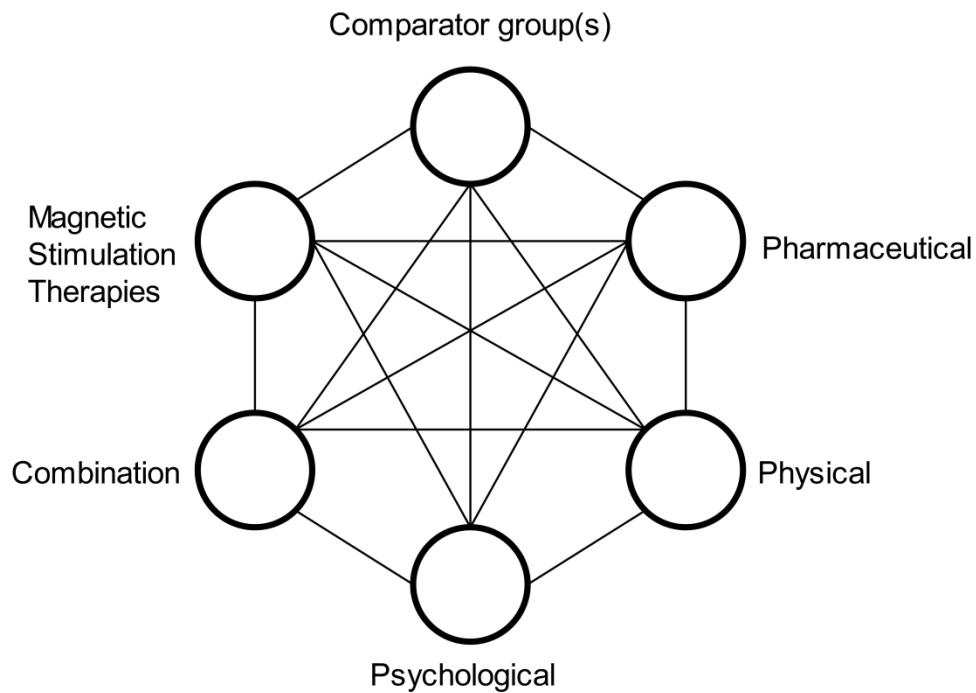

Figure 1: The possible network structure for the major categories of interventions. Comparator group(s) may be split into multiple nodes as outlined in the comparator group section.

2053x1443mm (72 x 72 DPI)



1  
2  
3  
4  
5  
6  
7  
8

## SUPPLEMENTARY FILE 1:

9  
10  
11  
12  
13  
14  
15

**Table 1: PRISMA-NMA guidelines checklist.**

16  
17  
18  
19  
20  
21  
22  
23  
24  
25  
26  
27  
28  
29  
30  
31  
32  
33

PRISMA NMA Checklist of Items to Include When Reporting A Systematic Review Involving a Network Meta-analysis

| Section/Topic             | Item # | Checklist Item                                                                                                                                                                                                                                                                                                                                                                                                                                                                                                                                                                                                                                                                                                                                                                          | Reported on Page #   |
|---------------------------|--------|-----------------------------------------------------------------------------------------------------------------------------------------------------------------------------------------------------------------------------------------------------------------------------------------------------------------------------------------------------------------------------------------------------------------------------------------------------------------------------------------------------------------------------------------------------------------------------------------------------------------------------------------------------------------------------------------------------------------------------------------------------------------------------------------|----------------------|
| <b>TITLE</b>              |        |                                                                                                                                                                                                                                                                                                                                                                                                                                                                                                                                                                                                                                                                                                                                                                                         |                      |
| Title                     | 1      | Identify the report as a systematic review <i>incorporating a network meta-analysis (or related form of meta-analysis)</i> .                                                                                                                                                                                                                                                                                                                                                                                                                                                                                                                                                                                                                                                            | 1                    |
| <b>ABSTRACT</b>           |        |                                                                                                                                                                                                                                                                                                                                                                                                                                                                                                                                                                                                                                                                                                                                                                                         |                      |
| Structured summary        | 2      | Provide a structured summary including, as applicable:<br><b>Background:</b> main objectives<br><b>Methods:</b> data sources; study eligibility criteria, participants, and interventions; study appraisal; and <i>synthesis methods, such as network meta-analysis</i> .<br><b>Results:</b> number of studies and participants identified; summary estimates with corresponding confidence/credible intervals; <i>treatment rankings may also be discussed. Authors may choose to summarize pairwise comparisons against a chosen treatment included in their analyses for brevity.</i><br><b>Discussion/Conclusions:</b> limitations; conclusions and implications of findings.<br><b>Other:</b> primary source of funding; systematic review registration number with registry name. | 2                    |
| <b>INTRODUCTION</b>       |        |                                                                                                                                                                                                                                                                                                                                                                                                                                                                                                                                                                                                                                                                                                                                                                                         |                      |
| Rationale                 | 3      | Describe the rationale for the review in the context of what is already known, <i>including mention of why a network meta-analysis has been conducted</i> .                                                                                                                                                                                                                                                                                                                                                                                                                                                                                                                                                                                                                             | 4                    |
| Objectives                | 4      | Provide an explicit statement of questions being addressed, with reference to participants, interventions, comparisons, outcomes, and study design (PICOS).                                                                                                                                                                                                                                                                                                                                                                                                                                                                                                                                                                                                                             | 5                    |
| <b>METHODS</b>            |        |                                                                                                                                                                                                                                                                                                                                                                                                                                                                                                                                                                                                                                                                                                                                                                                         |                      |
| Protocol and registration | 5      | Indicate whether a review protocol exists and if and where it can be accessed (e.g., Web address); and, if available, provide registration information, including registration number.                                                                                                                                                                                                                                                                                                                                                                                                                                                                                                                                                                                                  | 5                    |
| Eligibility criteria      | 6      | Specify study characteristics (e.g., PICOS, length of follow-up) and report characteristics (e.g., years considered, language, publication status) used as criteria for eligibility, giving rationale. <i>Clearly describe eligible treatments included in the treatment network, and note whether any have been clustered or merged into the same node (with justification)</i> .                                                                                                                                                                                                                                                                                                                                                                                                      | 6-9                  |
| Information sources       | 7      | Describe all information sources (e.g., databases with dates of coverage, contact with study authors to identify additional studies) in the search and date last searched.                                                                                                                                                                                                                                                                                                                                                                                                                                                                                                                                                                                                              | 9                    |
| Search                    | 8      | Present full electronic search strategy for at least one database,<br>For peer review only - <a href="http://bmjopen.bmj.com/site/about/guidelines.xhtml">http://bmjopen.bmj.com/site/about/guidelines.xhtml</a>                                                                                                                                                                                                                                                                                                                                                                                                                                                                                                                                                                        | Supplementary file 2 |

58  
59  
60

|    |                                        |           |                                                                                                                                                                                                                                                                                                                                                                                                                                                   |       |
|----|----------------------------------------|-----------|---------------------------------------------------------------------------------------------------------------------------------------------------------------------------------------------------------------------------------------------------------------------------------------------------------------------------------------------------------------------------------------------------------------------------------------------------|-------|
| 1  |                                        |           | including any limits used, such that it could be repeated.                                                                                                                                                                                                                                                                                                                                                                                        |       |
| 2  | Study selection                        | 9         | State the process for selecting studies (i.e., screening, eligibility, included in systematic review, and, if applicable, included in the meta-analysis).                                                                                                                                                                                                                                                                                         | 9-10  |
| 3  |                                        |           |                                                                                                                                                                                                                                                                                                                                                                                                                                                   |       |
| 4  |                                        |           |                                                                                                                                                                                                                                                                                                                                                                                                                                                   |       |
| 5  |                                        |           |                                                                                                                                                                                                                                                                                                                                                                                                                                                   |       |
| 6  |                                        |           |                                                                                                                                                                                                                                                                                                                                                                                                                                                   |       |
| 7  | Data collection process                | 10        | Describe method of data extraction from reports (e.g., piloted forms, independently, in duplicate) and any processes for obtaining and confirming data from investigators.                                                                                                                                                                                                                                                                        | 10-11 |
| 8  |                                        |           |                                                                                                                                                                                                                                                                                                                                                                                                                                                   |       |
| 9  |                                        |           |                                                                                                                                                                                                                                                                                                                                                                                                                                                   |       |
| 10 | Data items                             | 11        | List and define all variables for which data were sought (e.g., PICOS, funding sources) and any assumptions and simplifications made.                                                                                                                                                                                                                                                                                                             | 10-11 |
| 11 |                                        |           |                                                                                                                                                                                                                                                                                                                                                                                                                                                   |       |
| 12 |                                        |           |                                                                                                                                                                                                                                                                                                                                                                                                                                                   |       |
| 13 | <b>Geometry of the network</b>         | <b>S1</b> | Describe methods used to explore the geometry of the treatment network under study and potential biases related to it. This should include how the evidence base has been graphically summarized for presentation, and what characteristics were compiled and used to describe the evidence base to readers.                                                                                                                                      | 13    |
| 14 |                                        |           |                                                                                                                                                                                                                                                                                                                                                                                                                                                   |       |
| 15 |                                        |           |                                                                                                                                                                                                                                                                                                                                                                                                                                                   |       |
| 16 |                                        |           |                                                                                                                                                                                                                                                                                                                                                                                                                                                   |       |
| 17 |                                        |           |                                                                                                                                                                                                                                                                                                                                                                                                                                                   |       |
| 18 |                                        |           |                                                                                                                                                                                                                                                                                                                                                                                                                                                   |       |
| 19 |                                        |           |                                                                                                                                                                                                                                                                                                                                                                                                                                                   |       |
| 20 | Risk of bias within individual studies | 12        | Describe methods used for assessing risk of bias of individual studies (including specification of whether this was done at the study or outcome level), and how this information is to be used in any data synthesis.                                                                                                                                                                                                                            | 11-12 |
| 21 |                                        |           |                                                                                                                                                                                                                                                                                                                                                                                                                                                   |       |
| 22 |                                        |           |                                                                                                                                                                                                                                                                                                                                                                                                                                                   |       |
| 23 |                                        |           |                                                                                                                                                                                                                                                                                                                                                                                                                                                   |       |
| 24 |                                        |           |                                                                                                                                                                                                                                                                                                                                                                                                                                                   |       |
| 25 | Summary measures                       | 13        | State the principal summary measures (e.g., risk ratio, difference in means). <i>Also describe the use of additional summary measures assessed, such as treatment rankings and surface under the cumulative ranking curve (SUCRA) values, as well as modified approaches used to present summary findings from meta-analyses.</i>                                                                                                                 | 15    |
| 26 |                                        |           |                                                                                                                                                                                                                                                                                                                                                                                                                                                   |       |
| 27 |                                        |           |                                                                                                                                                                                                                                                                                                                                                                                                                                                   |       |
| 28 |                                        |           |                                                                                                                                                                                                                                                                                                                                                                                                                                                   |       |
| 29 |                                        |           |                                                                                                                                                                                                                                                                                                                                                                                                                                                   |       |
| 30 |                                        |           |                                                                                                                                                                                                                                                                                                                                                                                                                                                   |       |
| 31 | Planned methods of analysis            | 14        | Describe the methods of handling data and combining results of studies for each network meta-analysis. This should include, but not be limited to: <ul style="list-style-type: none"> <li>• <i>Handling of multi-arm trials;</i></li> <li>• <i>Selection of variance structure;</i></li> <li>• <i>Selection of prior distributions in Bayesian analyses; and</i></li> <li>• <i>Assessment of model fit.</i></li> </ul>                            | 12-17 |
| 32 |                                        |           |                                                                                                                                                                                                                                                                                                                                                                                                                                                   |       |
| 33 |                                        |           |                                                                                                                                                                                                                                                                                                                                                                                                                                                   |       |
| 34 |                                        |           |                                                                                                                                                                                                                                                                                                                                                                                                                                                   |       |
| 35 |                                        |           |                                                                                                                                                                                                                                                                                                                                                                                                                                                   |       |
| 36 |                                        |           |                                                                                                                                                                                                                                                                                                                                                                                                                                                   |       |
| 37 |                                        |           |                                                                                                                                                                                                                                                                                                                                                                                                                                                   |       |
| 38 |                                        |           |                                                                                                                                                                                                                                                                                                                                                                                                                                                   |       |
| 39 |                                        |           |                                                                                                                                                                                                                                                                                                                                                                                                                                                   |       |
| 40 | <b>Assessment of Inconsistency</b>     | <b>S2</b> | Describe the statistical methods used to evaluate the agreement of direct and indirect evidence in the treatment network(s) studied. Describe efforts taken to address its presence when found.                                                                                                                                                                                                                                                   | 15    |
| 41 |                                        |           |                                                                                                                                                                                                                                                                                                                                                                                                                                                   |       |
| 42 |                                        |           |                                                                                                                                                                                                                                                                                                                                                                                                                                                   |       |
| 43 |                                        |           |                                                                                                                                                                                                                                                                                                                                                                                                                                                   |       |
| 44 | Risk of bias across studies            | 15        | Specify any assessment of risk of bias that may affect the cumulative evidence (e.g., publication bias, selective reporting within studies).                                                                                                                                                                                                                                                                                                      | 16-17 |
| 45 |                                        |           |                                                                                                                                                                                                                                                                                                                                                                                                                                                   |       |
| 46 |                                        |           |                                                                                                                                                                                                                                                                                                                                                                                                                                                   |       |
| 47 | Additional analyses                    | 16        | Describe methods of additional analyses if done, indicating which were pre-specified. This may include, but not be limited to, the following: <ul style="list-style-type: none"> <li>• Sensitivity or subgroup analyses;</li> <li>• Meta-regression analyses;</li> <li>• <i>Alternative formulations of the treatment network; and</i></li> <li>• <i>Use of alternative prior distributions for Bayesian analyses (if applicable).</i></li> </ul> | 15-16 |
| 48 |                                        |           |                                                                                                                                                                                                                                                                                                                                                                                                                                                   |       |
| 49 |                                        |           |                                                                                                                                                                                                                                                                                                                                                                                                                                                   |       |
| 50 |                                        |           |                                                                                                                                                                                                                                                                                                                                                                                                                                                   |       |
| 51 |                                        |           |                                                                                                                                                                                                                                                                                                                                                                                                                                                   |       |
| 52 |                                        |           |                                                                                                                                                                                                                                                                                                                                                                                                                                                   |       |
| 53 |                                        |           |                                                                                                                                                                                                                                                                                                                                                                                                                                                   |       |
| 54 |                                        |           |                                                                                                                                                                                                                                                                                                                                                                                                                                                   |       |
| 55 |                                        |           |                                                                                                                                                                                                                                                                                                                                                                                                                                                   |       |
| 56 |                                        |           |                                                                                                                                                                                                                                                                                                                                                                                                                                                   |       |
| 57 |                                        |           |                                                                                                                                                                                                                                                                                                                                                                                                                                                   |       |
| 58 |                                        |           |                                                                                                                                                                                                                                                                                                                                                                                                                                                   |       |
| 59 |                                        |           |                                                                                                                                                                                                                                                                                                                                                                                                                                                   |       |
| 60 |                                        |           |                                                                                                                                                                                                                                                                                                                                                                                                                                                   |       |

|    |                                          |           |                                                                                                                                                                                                                                                                                                                                                                                                                                                              |    |
|----|------------------------------------------|-----------|--------------------------------------------------------------------------------------------------------------------------------------------------------------------------------------------------------------------------------------------------------------------------------------------------------------------------------------------------------------------------------------------------------------------------------------------------------------|----|
| 1  | Study selection                          | 17        | Give numbers of studies screened, assessed for eligibility, and included in the review, with reasons for exclusions at each stage, ideally with a flow diagram.                                                                                                                                                                                                                                                                                              | NA |
| 2  |                                          |           |                                                                                                                                                                                                                                                                                                                                                                                                                                                              |    |
| 3  | <b>Presentation of network structure</b> | <b>S3</b> | Provide a network graph of the included studies to enable visualization of the geometry of the treatment network.                                                                                                                                                                                                                                                                                                                                            | NA |
| 4  |                                          |           |                                                                                                                                                                                                                                                                                                                                                                                                                                                              |    |
| 5  | <b>Summary of network geometry</b>       | <b>S4</b> | Provide a brief overview of characteristics of the treatment network. This may include commentary on the abundance of trials and randomized patients for the different interventions and pairwise comparisons in the network, gaps of evidence in the treatment network, and potential biases reflected by the network structure.                                                                                                                            | NA |
| 6  |                                          |           |                                                                                                                                                                                                                                                                                                                                                                                                                                                              |    |
| 7  |                                          |           |                                                                                                                                                                                                                                                                                                                                                                                                                                                              |    |
| 8  |                                          |           |                                                                                                                                                                                                                                                                                                                                                                                                                                                              |    |
| 9  |                                          |           |                                                                                                                                                                                                                                                                                                                                                                                                                                                              |    |
| 10 |                                          |           |                                                                                                                                                                                                                                                                                                                                                                                                                                                              |    |
| 11 | Study characteristics                    | 18        | For each study, present characteristics for which data were extracted (e.g., study size, PICOS, follow-up period) and provide the citations.                                                                                                                                                                                                                                                                                                                 | NA |
| 12 |                                          |           |                                                                                                                                                                                                                                                                                                                                                                                                                                                              |    |
| 13 |                                          |           |                                                                                                                                                                                                                                                                                                                                                                                                                                                              |    |
| 14 | Risk of bias within studies              | 19        | Present data on risk of bias of each study and, if available, any outcome level assessment.                                                                                                                                                                                                                                                                                                                                                                  | NA |
| 15 |                                          |           |                                                                                                                                                                                                                                                                                                                                                                                                                                                              |    |
| 16 |                                          |           |                                                                                                                                                                                                                                                                                                                                                                                                                                                              |    |
| 17 | Results of individual studies            | 20        | For all outcomes considered (benefits or harms), present, for each study: 1) simple summary data for each intervention group, and 2) effect estimates and confidence intervals. <i>Modified approaches may be needed to deal with information from larger networks.</i>                                                                                                                                                                                      | NA |
| 18 |                                          |           |                                                                                                                                                                                                                                                                                                                                                                                                                                                              |    |
| 19 |                                          |           |                                                                                                                                                                                                                                                                                                                                                                                                                                                              |    |
| 20 |                                          |           |                                                                                                                                                                                                                                                                                                                                                                                                                                                              |    |
| 21 |                                          |           |                                                                                                                                                                                                                                                                                                                                                                                                                                                              |    |
| 22 | Synthesis of results                     | 21        | Present results of each meta-analysis done, including confidence/credible intervals. <i>In larger networks, authors may focus on comparisons versus a particular comparator (e.g. placebo or standard care), with full findings presented in an appendix. League tables and forest plots may be considered to summarize pairwise comparisons.</i> If additional summary measures were explored (such as treatment rankings), these should also be presented. | NA |
| 23 |                                          |           |                                                                                                                                                                                                                                                                                                                                                                                                                                                              |    |
| 24 |                                          |           |                                                                                                                                                                                                                                                                                                                                                                                                                                                              |    |
| 25 |                                          |           |                                                                                                                                                                                                                                                                                                                                                                                                                                                              |    |
| 26 |                                          |           |                                                                                                                                                                                                                                                                                                                                                                                                                                                              |    |
| 27 |                                          |           |                                                                                                                                                                                                                                                                                                                                                                                                                                                              |    |
| 28 |                                          |           |                                                                                                                                                                                                                                                                                                                                                                                                                                                              |    |
| 29 |                                          |           |                                                                                                                                                                                                                                                                                                                                                                                                                                                              |    |
| 30 | <b>Exploration for inconsistency</b>     | <b>S5</b> | Describe results from investigations of inconsistency. This may include such information as measures of model fit to compare consistency and inconsistency models, <i>P</i> values from statistical tests, or summary of inconsistency estimates from different parts of the treatment network.                                                                                                                                                              | NA |
| 31 |                                          |           |                                                                                                                                                                                                                                                                                                                                                                                                                                                              |    |
| 32 |                                          |           |                                                                                                                                                                                                                                                                                                                                                                                                                                                              |    |
| 33 |                                          |           |                                                                                                                                                                                                                                                                                                                                                                                                                                                              |    |
| 34 |                                          |           |                                                                                                                                                                                                                                                                                                                                                                                                                                                              |    |
| 35 |                                          |           |                                                                                                                                                                                                                                                                                                                                                                                                                                                              |    |
| 36 | Risk of bias across studies              | 22        | Present results of any assessment of risk of bias across studies for the evidence base being studied.                                                                                                                                                                                                                                                                                                                                                        | NA |
| 37 |                                          |           |                                                                                                                                                                                                                                                                                                                                                                                                                                                              |    |
| 38 | Results of additional analyses           | 23        | Give results of additional analyses, if done (e.g., sensitivity or subgroup analyses, meta-regression analyses, <i>alternative network geometries studied, alternative choice of prior distributions for Bayesian analyses, and so forth</i> ).                                                                                                                                                                                                              | NA |
| 39 |                                          |           |                                                                                                                                                                                                                                                                                                                                                                                                                                                              |    |
| 40 |                                          |           |                                                                                                                                                                                                                                                                                                                                                                                                                                                              |    |
| 41 |                                          |           |                                                                                                                                                                                                                                                                                                                                                                                                                                                              |    |
| 42 |                                          |           |                                                                                                                                                                                                                                                                                                                                                                                                                                                              |    |
| 43 |                                          |           |                                                                                                                                                                                                                                                                                                                                                                                                                                                              |    |
| 44 |                                          |           |                                                                                                                                                                                                                                                                                                                                                                                                                                                              |    |
| 45 |                                          |           |                                                                                                                                                                                                                                                                                                                                                                                                                                                              |    |
| 46 |                                          |           |                                                                                                                                                                                                                                                                                                                                                                                                                                                              |    |
| 47 |                                          |           |                                                                                                                                                                                                                                                                                                                                                                                                                                                              |    |
| 48 |                                          |           |                                                                                                                                                                                                                                                                                                                                                                                                                                                              |    |
| 49 |                                          |           |                                                                                                                                                                                                                                                                                                                                                                                                                                                              |    |
| 50 |                                          |           |                                                                                                                                                                                                                                                                                                                                                                                                                                                              |    |
| 51 |                                          |           |                                                                                                                                                                                                                                                                                                                                                                                                                                                              |    |
| 52 |                                          |           |                                                                                                                                                                                                                                                                                                                                                                                                                                                              |    |
| 53 |                                          |           |                                                                                                                                                                                                                                                                                                                                                                                                                                                              |    |
| 54 |                                          |           |                                                                                                                                                                                                                                                                                                                                                                                                                                                              |    |
| 55 |                                          |           |                                                                                                                                                                                                                                                                                                                                                                                                                                                              |    |
| 56 |                                          |           |                                                                                                                                                                                                                                                                                                                                                                                                                                                              |    |
| 57 |                                          |           |                                                                                                                                                                                                                                                                                                                                                                                                                                                              |    |
| 58 |                                          |           |                                                                                                                                                                                                                                                                                                                                                                                                                                                              |    |
| 59 |                                          |           |                                                                                                                                                                                                                                                                                                                                                                                                                                                              |    |
| 60 |                                          |           |                                                                                                                                                                                                                                                                                                                                                                                                                                                              |    |

**DISCUSSION**

|                     |    |                                                                                                                                                                                                                                                                                                                                                                                                                                |    |
|---------------------|----|--------------------------------------------------------------------------------------------------------------------------------------------------------------------------------------------------------------------------------------------------------------------------------------------------------------------------------------------------------------------------------------------------------------------------------|----|
| Summary of evidence | 24 | Summarize the main findings, including the strength of evidence for each main outcome; consider their relevance to key groups (e.g., healthcare providers, users, and policy-makers).                                                                                                                                                                                                                                          | NA |
| Limitations         | 25 | Discuss limitations at study and outcome level (e.g., risk of bias), and at review level (e.g., incomplete retrieval of identified research, reporting bias). <i>Comment on the validity of the assumptions, such as transitivity and consistency. Comment on any concerns regarding network geometry (e.g., avoidance of certain comparisons).</i>                                                                            | 3  |
| Conclusions         | 26 | Provide a general interpretation of the results in the context of other evidence, and implications for future research.                                                                                                                                                                                                                                                                                                        | NA |
| <b>FUNDING</b>      |    |                                                                                                                                                                                                                                                                                                                                                                                                                                | 18 |
| Funding             | 27 | Describe sources of funding for the systematic review and other support (e.g., supply of data); role of funders for the systematic review. This should also include information regarding whether funding has been received from manufacturers of treatments in the network and/or whether some of the authors are content experts with professional conflicts of interest that could affect use of treatments in the network. |    |

PICOS = population, intervention, comparators, outcomes, study design.

\* Text in italics indicates wording specific to reporting of network meta-analyses that has been added to guidance from the PRISMA statement.

† Authors may wish to plan for use of appendices to present all relevant information in full detail for items in this

**SUPPLEMENTARY FILE 2:****Complete database search strategy**

Table 1: search strategy for databases EMBASE, APA PsycInfo, Ovid MEDLINE, Cochrane CENTRAL.

|           | <b>Search terms</b>                                                                                                                                                                                                                                                |
|-----------|--------------------------------------------------------------------------------------------------------------------------------------------------------------------------------------------------------------------------------------------------------------------|
| <b>1</b>  | multiple sclerosis.ti,ab.                                                                                                                                                                                                                                          |
| <b>2</b>  | exp multiple sclerosis/                                                                                                                                                                                                                                            |
| <b>3</b>  | 1 or 2                                                                                                                                                                                                                                                             |
| <b>4</b>  | exp depression/                                                                                                                                                                                                                                                    |
| <b>5</b>  | (depress* or mood disorder or despair or misery or unhappiness or dysthymia or dysphor* or seasonal affective disorder or affective disorder or sadness or loss of pleasure).ti,ab.                                                                                |
| <b>6</b>  | 4 or 5                                                                                                                                                                                                                                                             |
| <b>7</b>  | exp randomized controlled trial/                                                                                                                                                                                                                                   |
| <b>8</b>  | ("random* control* trial*" or RCT or "random-allocation*" or "random allocation*" or "double-blind*" or "double blind*" or "single-blind*" or "single blind*" or mask* or random* or "control* stud*" or "control* clinical trial*" or "comparative stud*").ti,ab. |
| <b>9</b>  | 7 or 8                                                                                                                                                                                                                                                             |
| <b>10</b> | 3 AND 6 AND 9                                                                                                                                                                                                                                                      |

Table 2: search strategy for databases CINAHL and Web of Science.

|          | <b>Search Term</b>                                                                                                                                                                                                                                          |
|----------|-------------------------------------------------------------------------------------------------------------------------------------------------------------------------------------------------------------------------------------------------------------|
| <b>1</b> | “multiple sclerosis”                                                                                                                                                                                                                                        |
| <b>2</b> | depress* or “mood disorder*” or despair or misery or unhappiness or dysthymia or dysphor* or “seasonal affective disorder” or “affective disorder” or sadness or “loss of pleasure”                                                                         |
| <b>3</b> | ("random* control* trial*" or RCT or "random-allocation*" or "random allocation*" or "double-blind*" or "double blind*" or "single-blind*" or "single blind*" or mask* or random* or "control* stud*" or "control* clinical trial*" or "comparative stud*") |
| <b>4</b> | 1 AND 2 AND 3                                                                                                                                                                                                                                               |

1  
2  
3  
4  
5  
6  
7  
8  
9  
10  
11  
12  
13  
14  
15  
16  
17  
18  
19  
20  
21  
22  
23  
24  
25  
26  
27  
28  
29  
30  
31  
32  
33  
34  
35  
36  
37  
38  
39  
40  
41  
42  
43  
44  
45  
46  
47  
48  
49  
50  
51  
52  
53  
54  
55  
56  
57  
58  
59  
60

Table 3: search strategy for PEDro database.

|          | <b>Search line</b>                |
|----------|-----------------------------------|
| <b>1</b> | “multiple sclerosis” and depress* |

For peer review only

# BMJ Open

## Comparing the effectiveness, safety, and tolerability of interventions for depressive symptoms in people with multiple sclerosis: a systematic review and network meta-analysis protocol

|                                 |                                                                                                                                                                                                                                                                                                                                                                                                                                                                                                                                                                                                                                                                                                                                                                                                                                                                                                                                                                                                                                                          |
|---------------------------------|----------------------------------------------------------------------------------------------------------------------------------------------------------------------------------------------------------------------------------------------------------------------------------------------------------------------------------------------------------------------------------------------------------------------------------------------------------------------------------------------------------------------------------------------------------------------------------------------------------------------------------------------------------------------------------------------------------------------------------------------------------------------------------------------------------------------------------------------------------------------------------------------------------------------------------------------------------------------------------------------------------------------------------------------------------|
| Journal:                        | <i>BMJ Open</i>                                                                                                                                                                                                                                                                                                                                                                                                                                                                                                                                                                                                                                                                                                                                                                                                                                                                                                                                                                                                                                          |
| Manuscript ID                   | bmjopen-2021-055796.R1                                                                                                                                                                                                                                                                                                                                                                                                                                                                                                                                                                                                                                                                                                                                                                                                                                                                                                                                                                                                                                   |
| Article Type:                   | Protocol                                                                                                                                                                                                                                                                                                                                                                                                                                                                                                                                                                                                                                                                                                                                                                                                                                                                                                                                                                                                                                                 |
| Date Submitted by the Author:   | 04-Mar-2022                                                                                                                                                                                                                                                                                                                                                                                                                                                                                                                                                                                                                                                                                                                                                                                                                                                                                                                                                                                                                                              |
| Complete List of Authors:       | Lyons, Julia; The University of Melbourne School of Population and Global Health, Disability and Health Unit<br>Campese, Stephanie; The University of Melbourne School of Population and Global Health, Disability and Health Unit<br>Learmonth, Yvonne ; Murdoch University, Discipline of Exercise Science & Centre for Molecular Medicine and Innovative Therapeutics, Health Futures Institute; Perron Institute for Neurological and Translational Science<br>Metse, Alexandra; University of Newcastle, School of Psychology; University of the Sunshine Coast, School of Health and Behavioural Sciences<br>Kermode, Allan; Perron Institute for Neurological and Translational Science; Murdoch University, Centre for Molecular Medicine and Innovative Therapeutics, Health Futures Institute<br>Karahalios, Amalia; The University of Melbourne School of Population and Global Health, Centre for Epidemiology and Biostatistics<br>Marck, C; The University of Melbourne School of Population and Global Health, Disability and Health Unit |
| <b>Primary Subject Heading</b>: | Epidemiology                                                                                                                                                                                                                                                                                                                                                                                                                                                                                                                                                                                                                                                                                                                                                                                                                                                                                                                                                                                                                                             |
| Secondary Subject Heading:      | Neurology                                                                                                                                                                                                                                                                                                                                                                                                                                                                                                                                                                                                                                                                                                                                                                                                                                                                                                                                                                                                                                                |
| Keywords:                       | Multiple sclerosis < NEUROLOGY, MENTAL HEALTH, Depression & mood disorders < PSYCHIATRY, EPIDEMIOLOGY                                                                                                                                                                                                                                                                                                                                                                                                                                                                                                                                                                                                                                                                                                                                                                                                                                                                                                                                                    |
|                                 |                                                                                                                                                                                                                                                                                                                                                                                                                                                                                                                                                                                                                                                                                                                                                                                                                                                                                                                                                                                                                                                          |

SCHOLARONE™  
Manuscripts



1  
2  
3 1 **Title: Comparing the effectiveness, safety, and tolerability of interventions for depressive**  
4  
5 2 **symptoms in people with multiple sclerosis: a systematic review and network meta-**  
6  
7 3 **analysis protocol**  
8  
9

10  
11 4 Julia Lyons <sup>a</sup>, Stephanie Campese <sup>a</sup>, Yvonne C Learmonth <sup>b,c,d</sup>, Alexandra Metse <sup>e, f</sup>, Allan G.  
12  
13 5 Kermode <sup>c,d</sup>, Amalia Karahalios <sup>g\*</sup>, Claudia H Marck <sup>a\*</sup>  
14  
15

16  
17 6 \*Shared last author  
18

19 7 Full affiliation(s):  
20

21 8 <sup>a</sup> Disability and Health Unit, Melbourne School of Population and Global Health, University  
22 9 of Melbourne, Victoria, Australia  
23

24 10 <sup>b</sup> Discipline of Exercise Science, Murdoch University, Murdoch, Western Australia, Australia  
25

26 11 <sup>c</sup> Perron Institute for Neurological and Translational Science, Perth, Western Australia,  
27 12 Australia  
28

29 13 <sup>d</sup> Centre for Molecular Medicine and Innovative Therapeutics, Health Futures Institute,  
30 14 Murdoch University, Murdoch, Western Australia, Australia  
31

32 15 <sup>e</sup> School of Health and Behavioural Sciences, University of the Sunshine Coast, Sippy Downs,  
33 16 Queensland, Australia  
34

35 17 <sup>f</sup> School of Psychology, University of Newcastle, Callaghan, New South Wales, Australia  
36

37 18 <sup>g</sup> Centre for Epidemiology and Biostatistics, Melbourne School of Population and Global  
38 19 Health, University of Melbourne, Australia  
39

40  
41  
42 20  
43 21 Corresponding author:  
44

45 22 Dr Amalia Karahalios  
46

47 23 Melbourne School of Population and Global Health,  
48

49 24 University of Melbourne,  
50

51 25 Parkville 3010, Victoria, Australia  
52

53 26 [emily.karahalios@unimelb.edu.au](mailto:emily.karahalios@unimelb.edu.au)  
54

55 27 **Word count: 3565**  
56  
57  
58  
59  
60

1  
2  
3 28 **ABSTRACT**  
4

5 29 **Background**  
6

7  
8 30 Comorbid depression is prevalent in people with multiple sclerosis (MS). Depression is  
9  
10 31 commonly untreated or undertreated and there is a need for effective and safe interventions.  
11  
12 32 Current guidelines recommend psychological and pharmaceutical interventions for the  
13  
14 33 management of depression in people with MS. However, current research suggests other  
15  
16 34 interventions, such as exercise, could also be effective. The comparative efficacy and safety of  
17  
18 35 intervention modalities have not been established in the literature.  
19  
20  
21  
22  
23

24 37 We plan to conduct a systematic review and network meta-analysis to compare efficacy and  
25  
26 38 safety of psychological, pharmaceutical, physical, and magnetic stimulation interventions for  
27  
28 39 depression in people with MS.  
29  
30  
31  
32

33 41 **Methods:**  
34

35 42 We will search seven key databases with search terms revolving around three concepts: MS,  
36  
37 43 depression, and randomised controlled trials. Included studies will be randomised controlled  
38  
39 44 trials, where the participants are people with MS people that are randomised to receive one of  
40  
41 45 the aforementioned intervention types. For a trial to be included, depression or depressive  
42  
43 46 symptoms will be the primary outcome, only outcome, or secondary outcome with an *a priori*  
44  
45 47 power calculation. Screening of the citations and full text articles, data extraction, and risk of  
46  
47 48 bias assessment (using the Risk of Bias 2 tool - RoB 2) will be conducted by two independent  
48  
49 49 reviewers. We plan to pool the trials using pairwise and network meta-analysis. For the  
50  
51  
52  
53 50 pairwise meta-analyses, we will fit a random effects model. For the network meta-analysis, we  
54  
55  
56  
57  
58  
59  
60

1  
2  
3 51 will fit a frequentist multivariate random effects model. For the pairwise and network meta-  
4  
5 52 analysis models, efficacy will be measured using a standardised mean difference, and safety  
6  
7 53 using an odds ratio. If possible, we will provide summary measures including forest plots, a  
8  
9  
10 54 geometry of the network, surface under the cumulative ranking curve, and a league table.  
11  
12 55 Subgroup analysis will be performed if possible, using pre-planned variables.  
13

14  
15 56 **Review registration:**

16  
17 57 PROSPERO registration number CRD42020209803.  
18  
19 58

20  
21 59 **STRENGTHS AND LIMITATIONS OF THIS STUDY:**

- 22  
23  
24 60 • This will be the first systematic review and network meta-analysis to quantify the  
25  
26 61 comparative efficacy, safety, and tolerability of interventions for depression in people with  
27  
28 62 MS.  
29  
30  
31 63 • Eligibility criteria include randomised controlled trials which are limited to depression as the  
32  
33 64 primary outcome, only outcome, or secondary outcome with a power analysis.  
34  
35 65 • The review will aim to simultaneously compare intervention types that are used in both  
36  
37 66 clinical and research settings.  
38  
39  
40 67 • To meet the transitivity assumption, trials that include participants with treatment  
41  
42 68 resistant/refractory depression will be excluded.  
43  
44

45 69 **KEYWORDS:** multiple sclerosis, depression or depressive symptoms, network meta-  
46  
47 70 analysis, systematic review.  
48  
49

50  
51 71 **ARTICLE TYPE:** protocol  
52  
53  
54  
55 72

## 73 INTRODUCTION:

74 Multiple Sclerosis (MS) is a chronic, immune mediated and neurodegenerative disease  
75 characterised by the formation of destructive lesions predominantly involving myelinated  
76 axons within the central nervous system <sup>1</sup>. There are a broad range of symptoms attributed to  
77 the multifocal lesions distinctive of MS including depression and depressive symptoms, pain,  
78 fatigue, impaired gait, incontinence, impaired vision, and spasticity <sup>2</sup>. Depression can be  
79 particularly burdensome, and affects up to 50% of people with MS <sup>3</sup>. Depressive symptoms in  
80 people with MS are reported to impact adherence to disease modifying therapies <sup>4</sup>, and  
81 increase pain sensitivity <sup>2</sup>. Further, reduced participation in work and depressive symptoms  
82 are associated with poor health related quality of life <sup>5</sup> in people with MS. Major depressive  
83 disorder is the most commonly diagnosed depressive disorder <sup>6</sup>. It is defined as experiencing a  
84 minimum of five of the following symptoms within a two-week period: depressed mood or  
85 lack of pleasure, feelings of worthlessness/guilt, fatigue, appetite or weight changes,  
86 psychomotor agitation, diminished concentration, feelings of worthlessness/guilt, suicidality  
87 and sleep difficulties <sup>6</sup>. Depressive symptoms which do not meet the definition of major  
88 depressive disorder are even more prevalent in people with MS, and commonly require  
89 treatment <sup>7</sup>. Furthermore, people with MS who have moderate-to-severe depressive symptoms  
90 have been reportedly underdiagnosed and undertreated <sup>5,8</sup>. The aetiology of depression and  
91 depressive symptoms in people with MS is not yet fully understood <sup>9</sup> but due to the multitude  
92 of effects, safe and effective interventions are required.

93 Guidelines for treating depression in people with MS suggest that a combination of  
94 psychological and pharmaceutical interventions is the most effective therapy in reducing

1  
2  
3 95 levels of depressive symptoms<sup>10 11</sup>. Specifically, these guidelines recommend  
4  
5 96 pharmacotherapies such as antidepressants, psychological treatments such as cognitive  
6  
7 97 behavioural therapy, and, where applicable and safe, exercise-based interventions<sup>11</sup>.  
8  
9  
10 98 However, some interventions, including third wave cognitive and behavioural (psychological)  
11  
12 99 interventions that emphasise the role of mindfulness<sup>12</sup> and specific types of exercise such as  
13  
14 100 Pilates<sup>13</sup>, have not been included in these guidelines. The American Association of  
15  
16 101 Neurology review to inform guidelines<sup>14</sup> noted the scarcity of trials to treat depression in  
17  
18 102 people with MS and therefore a lack of strong evidence. Following this review<sup>14</sup>, several  
19  
20 103 studies have sought to address the treatment of depressive symptoms in MS. Evidence from  
21  
22 104 systematic reviews reported that exercise<sup>15 16</sup> and mindfulness-based interventions<sup>17</sup> when  
23  
24 105 compared to waitlist/usual care have a moderate effect at reducing depressive symptoms in  
25  
26 106 people with MS. However, it is unclear how these interventions compare in terms of efficacy  
27  
28 107 and safety.  
29  
30  
31  
32  
33

34 108 Network meta-analysis enables the comparison of multiple interventions by simultaneously  
35  
36 109 combining direct and indirect evidence<sup>18</sup>. Synthesising the evidence in this manner will  
37  
38 110 enable a comprehensive understanding of how interventions compare (in terms of efficacy and  
39  
40 111 safety), which should greatly enhance evidence-based decision making for people with MS  
41  
42 112 and their clinicians on how best to manage depressive symptoms. The major assumption  
43  
44 113 underpinning network meta-analysis methods ensures that we can compare two interventions  
45  
46 114 via a third (common) intervention and is referred to as transitivity. Transitivity requires that  
47  
48 115 the trials included in the network meta-analysis are considered to be ‘jointly randomisable’,  
49  
50 116 that the common intervention (comparator) from the different trials is similar enough to be  
51  
52 117 combined, and that the characteristics associated with the effect of the intervention are similar  
53  
54  
55  
56  
57  
58  
59  
60

1  
2  
3 118 across the included trials<sup>19 20</sup>.  
4  
5

6  
7 119 This article outlines the protocol for a systematic review and network meta-analysis to  
8  
9 120 compare the effectiveness and safety of intervention modalities, or combination of modalities,  
10  
11 121 in reducing depressive symptoms in adults with MS. This review is the first stage of a larger  
12  
13 122 project that aims to provide guidance for public health researchers on the design and analysis  
14  
15 123 of systematic reviews with network meta-analysis and future trials in MS.  
16  
17  
18

## 19 20 124 **METHODS** 21 22

23  
24 125 This systematic review protocol is registered with The International Prospective Register of  
25  
26 126 Systematic Reviews (PROSPERO) (CRD42020209803) and adheres to the Preferred  
27  
28 127 Reporting Items for Systematic Reviews and Meta-Analyses extension for Network Meta-  
29  
30 128 Analysis (PRISMA NMA) statement <sup>21</sup>, see supplementary file 1 for checklist.  
31  
32  
33

## 34 129 **Patient and public involvement** 35 36 37

38 130 Neither patients nor the public were involved in the design, conduct, or reporting of the  
39  
40 131 research in this article.  
41  
42  
43

## 44 132 **Eligibility criteria** 45 46

### 47 133 **Participants** 48 49

50 134 Adults (aged 18 years or older) of any gender who have been diagnosed with any type of MS.  
51  
52  
53

### 54 135 **Interventions** 55 56 57 58 59 60

1  
2  
3 136 We will include interventions that aim to alleviate depressive symptoms in people with MS,  
4  
5 137 including:

6  
7  
8  
9 138 *Psychological interventions* delivered with the intention of treating depressive symptoms,  
10  
11 139 informed by psychological theories or principle(s) and a) implemented by a  
12  
13 140 psychiatrist/psychologist or other mental health clinician or b) manualized, with content  
14  
15 141 developed by a mental health clinician or researcher, e.g., online/app or web-based  
16  
17 142 intervention.

18  
19  
20  
21  
22 143 *Pharmaceutical interventions* that involve the use of medication or drugs for the intention of  
23  
24 144 treating depressive symptoms at a therapeutic dose according to the manufacturer guidelines  
25  
26 145 (if available).

27  
28  
29  
30  
31 146 *Physical interventions* including physiotherapy and physical activity (any bodily movement  
32  
33 147 that results in energy expenditure) including exercise, aimed at treating depressive symptoms.  
34  
35 148 Subtypes of physical activity will be included.

36  
37  
38  
39 149 *Electromagnetic stimulations* involve the use of targeted electromagnetic stimulation to  
40  
41 150 stimulate areas of the brain to reduce depressive symptoms. Subtypes include transcranial  
42  
43 151 magnetic stimulation, and transcranial direct current stimulation.

44  
45  
46  
47 152 Combinations of the above-mentioned intervention modalities will be included and will form  
48  
49 153 new categories. Any interventions that are specific to people with treatment resistant  
50  
51 154 depression/refractory depression will not be included (e.g., electroconvulsive therapy). These  
52  
53 155 treatments will be excluded because they will compromise the transitivity assumption (i.e.,  
54  
55  
56  
57  
58  
59  
60

1  
2  
3 156 that all interventions are considered to be ‘jointly randomisable’). Treatments for people with  
4  
5 157 treatment resistant depression would not be considered to meet this assumption because they  
6  
7  
8 158 are not considered first line treatments for people with MS<sup>18</sup>.  
9

10  
11 159 Grouping of interventions will depend on the eligible trials. The four broad categories will be  
12  
13  
14 160 split into smaller sub-categories, e.g., psychological interventions could have a sub-category  
15  
16 161 of mindfulness-based interventions, similarly pharmaceutical interventions could have a sub-  
17  
18 162 category of serotonin reuptake inhibitors.  
19

## 20 21 22 163 Comparator 23

24  
25  
26 164 We will consider the following comparators: any intervention modality included in the above  
27  
28 165 list, placebo, wait-list control, treatment as usual, or no treatment. Classification of comparator  
29  
30 166 groups will depend on the type of comparator used in the original randomised trial. Common  
31  
32 167 types of comparators can include, but are not limited to, placebo, wait-list control, treatment  
33  
34 168 as usual, and no treatment control. These comparator groups do not have similar methodology  
35  
36  
37 169 and can influence participant outcome in altering ways. Therefore, for this protocol and  
38  
39 170 subsequent systematic review and network meta-analysis, we will adopt the recommended  
40  
41 171 framework for classification of comparator groups<sup>22</sup>. The groups will be (1) minimal  
42  
43 172 treatment control, active control, or similar; (2) wait-list control, treatment as usual, or no  
44  
45 173 treatment; and (3) pill placebo.  
46  
47  
48  
49

## 50 51 174 Outcome 52

53  
54 175 We will include trials that specified that depressive symptoms were the primary (or only)  
55  
56  
57  
58  
59  
60



1  
2  
3 176 outcome, or as a secondary outcome where an *a-priori* power calculation was provided. The  
4  
5 177 severity of depressive symptoms must have been measured by a validated self-report  
6  
7  
8 178 questionnaire or by clinician interview. Although depression and depressive symptoms are  
9  
10 179 likely to be measured and defined differently across trials <sup>23</sup>, we have chosen to accept all  
11  
12 180 types of standardised measures or clinical interviews. To assess the acute efficacy of the  
13  
14  
15 181 intervention, depressive symptoms must be measured within two weeks of completion of the  
16  
17 182 intervention. We will also assess the long-term efficacy of the intervention using trials that  
18  
19 183 have measured depressive symptoms at approximately six months post-intervention (within 4-  
20  
21 184 8 months). To measure long term efficacy and safety of interventions for reducing depressive  
22  
23  
24 185 symptoms we will also extract the relevant data that is measured 12 or more months post-  
25  
26 186 intervention. Any trials that have measured just one of the aforementioned time points will  
27  
28 187 still be eligible for inclusion.

30  
31  
32 188 Safety and tolerability outcomes will include:

- 33  
34  
35  
36 189 - Frequency of serious adverse events (SAEs) defined as an untoward occurrence of a medical  
37  
38 190 event that is fatal, life-threatening, requires hospitalisation or prolonging of existing  
39  
40  
41 191 hospitalisation and/or persistent disability <sup>24-27</sup>.
- 42  
43 192 - Frequency of adverse events (AEs) defined as the occurrence of an undesirable event  
44  
45 193 occurring during the study duration even if the event was not considered to be related to the  
46  
47 194 intervention <sup>24-27</sup>.
- 48  
49  
50 195 - Tolerability of the intervention will be assessed as the number of participants who  
51  
52 196 discontinue the study and/or have reduced compliance due to SAE or AEs <sup>24 28</sup>.

53  
54  
55  
56 197 The events will be measured as dichotomous outcomes during the intervention period. We  
57  
58  
59

1  
2  
3 198 will consider combining the SAE's and AE's if they are rare events in the trials.  
4  
5

6  
7 199 **Types of Studies**  
8  
9

10 200 We will include randomised controlled trials, including multi-arm randomised trials. Quasi-  
11  
12 201 randomised, cluster and cross-over trials will not be included.  
13  
14  
15

16  
17 202 **Search strategy**  
18  
19

20 203 We will search the following seven databases: EMBASE, Medline, Cochrane CENTRAL,  
21  
22 204 APA PsycInfo, Web of Science, CINAHL and PEDro. Note that EMBASE, Medline,  
23  
24 205 Cochrane CENTRAL and APA PsycInfo will be searched through the Ovid platform. The  
25  
26 206 search strategy was developed in conjunction with a medical librarian at the University of  
27  
28 207 Melbourne, Australia, as well as a clinical physiotherapist (YL) who works with people with  
29  
30 208 MS, and a clinical psychologist (AM). The search terms relate to three main concepts of MS,  
31  
32 209 depression, and randomised controlled trials. Search strategies for all databases are listed in  
33  
34 210 supplementary file 2. All databases were searched from inception to the 11<sup>th</sup> of July 2020 and  
35  
36 211 the search will be updated to include articles published up to the 31<sup>st</sup> of December 2021. We  
37  
38 212 will also search the reference lists of relevant systematic reviews to identify any randomised  
39  
40 213 trials that might have been missed in the database search. Trials will be limited to those  
41  
42 214 published in English.  
43  
44  
45  
46  
47  
48  
49

50 215 **Study selection**  
51  
52

53 216 Results from the search strategy will be uploaded to Endnote<sup>29</sup> where duplicates will be  
54  
55 217 removed. The remaining citations will be uploaded into the software management system  
56  
57  
58  
59  
60

1  
2  
3 218 Covidence<sup>30</sup> where any additional duplicates will be removed. Covidence will then be used  
4  
5 219 for title and abstract screening and full text screening by at least two independent reviewers  
6  
7  
8 220 with any conflicts resolved by a third reviewer.  
9

## 11 221 **Data Extraction**

12  
13  
14  
15 222 Data will be extracted using a data extraction tool developed for this review using Excel  
16  
17 223 software by at least two independent reviewers, with conflicts resolved by a third reviewer. If  
18  
19 224 data were missing from the published article the corresponding author will be contacted. We  
20  
21 225 will not look at other sources of citations such as grey literature, clinical trial registries, or  
22  
23 226 protocol papers. The extracted data will relate to the following categories:  
24  
25

- 26  
27  
28 227 - Study characteristics: first author's last name, year of publication, year of baseline  
29  
30 228 recruitment, method of recruitment, method of randomisation, inclusion criteria (e.g., a  
31  
32 229 baseline level of depression cut off for inclusion into study).  
33  
34 230 - Sample demographics: sample size, number of participants randomised, baseline  
35  
36 231 characteristics such as diagnosis of MS, age (years), sex, years since diagnosis of MS, level of  
37  
38 232 disability, and disability tool.  
39  
40 233 - Intervention and comparator characteristics: type, frequency of intervention/treatment,  
41  
42 234 duration of intervention/treatment, and dose of intervention/treatment. We will use TIDieR for  
43  
44 235 clear reporting of the characteristics of the interventions and comparators<sup>31</sup>.  
45  
46  
47 236 - Efficacy outcome data: type of outcome measurement scale, mean and standard deviation of  
48  
49 237 depressive symptom score at baseline, post-intervention, at six months post-intervention, and  
50  
51 238 at 12 months post-intervention (if available).  
52  
53  
54 239 - Safety and tolerability data: type and number of SAEs and AEs, number of participants that  
55  
56  
57  
58  
59  
60

1  
2  
3 240 discontinue participation due to an SAE or AE or discontinue participation for other reasons  
4  
5 241 during the intervention. Safety and tolerability data will be extracted for each trial arm and  
6  
7 242 time point where available.

8  
9  
10 243 - Data relating to the risk of bias assessment: randomisation process, allocation concealment,  
11  
12 244 deviations from intended treatment, baseline characteristics differences, missing outcome  
13  
14 245 data, appropriateness of outcome measurement, potential influence in outcome assessment,  
15  
16 246 and selectively reporting results.  
17  
18

19 247

## 20 21 248 **Risk of bias assessment**

22  
23  
24  
25 249 We will use the RoB 2 to assess the risk of bias for each study that meets the eligibility criteria  
26  
27 250 <sup>32</sup>. This tool evaluates the risk of bias in five key domains: randomisation process, deviations  
28  
29 251 from intended interventions, missing outcome data, measurement of the outcome, and  
30  
31 252 selection of the reported result. The RoB 2 tool provides an overall assessment of the risk of  
32  
33 253 bias in the study using three categories: low risk, some concerns or high risk of bias. At least  
34  
35 254 two independent reviewers will assess the risk of bias in each study with any conflicts  
36  
37 255 between judgements resolved by a third reviewer. In this systematic review and network meta-  
38  
39 256 analysis there will be an inherent difference in the overall risk of bias between trials due to the  
40  
41 257 type of intervention. Blinding of the participants to the assigned intervention is difficult in  
42  
43 258 some study designs and interventions. For example, in a trial that randomised participants to  
44  
45 259 exercise and wait-list control, participants will be aware of the treatment arm that they were  
46  
47 260 allocated to. However, in a trial that randomised participants to an anti-depressant and  
48  
49 261 placebo, participants are unlikely to be aware which treatment they were allocated. As well,  
50  
51 262 blinding of the outcome assessors can also be difficult in these trials as depressive symptoms  
52  
53  
54  
55  
56  
57  
58  
59  
60

263 are typically measured using self-reported tools. Despite this inherent difference we have  
264 chosen not to deviate from the protocol of the RoB 2 tool or alter the tool in any way.

## 265 **Data synthesis**

### 266 Characteristics of the included trials

267 We will generate descriptive statistics for the sample populations to understand the  
268 demographics of the review participants across all eligible trials. These descriptive statistics  
269 will describe key clinical and methodological characteristics such as age, sex, type of MS, and  
270 type of intervention modality.

### 271 Outcome data

272 We will have two primary and two secondary outcomes.

#### 273 *Primary outcomes:*

- 274 (1) efficacy of the interventions (reduction of depressive symptoms) measured  
275 immediately post-intervention and quantified using standardised mean difference<sup>33</sup>, and
- 276 (2) safety of the interventions (SAEs, AEs and tolerability) measured immediately post-  
277 intervention and quantified using odds ratios.

#### 278 *Secondary outcomes:*

- 279 (1) efficacy of the interventions (reduction of depressive symptoms) measured  
280 immediately six months post-intervention (between four and eight months) and quantified

1  
2  
3 281 using standardised mean differences;  
4

5 282 (2) safety of the interventions (SAEs, AEs and tolerability) measured six months post  
6  
7  
8 283 intervention (between four and eight months) and quantified using odds ratios;  
9

10 284 (3) efficacy of intervention (reduction of depressive symptoms) measured 12 months post-  
11  
12 285 intervention (12 months or longer) and quantified using standardised mean differences;  
13

14 286 (4) safety of interventions (SAEs, AEs and tolerability) measured 12 months post-  
15  
16  
17 287 intervention (12 months or longer) and quantified using odds ratios.  
18

19 288

20  
21 289 Pairwise Meta-analysis  
22  
23

24  
25 290 First, we will pool the data that compare the same major category of intervention modality  
26

27 291 (i.e., psychological, pharmaceutical, physical, electromagnetic stimulation therapies or  
28

29 292 combination) to each other or to placebo/usual care by fitting a random effects pairwise meta-  
30

31 293 analysis model and using the restricted maximum likelihood estimator to estimate the between  
32

33 294 study heterogeneity. The random effects model will assume that the underlying intervention  
34

35 295 effects across the trials are similar but not identical allowing an estimation of the  
36

37 296 heterogeneity in the model<sup>34</sup>. This will be performed for both the efficacy outcome, using the  
38

39 297 standardised mean difference, and the safety outcome, using odds ratios. Effect sizes will be  
40

41 298 presented with their corresponding 95% confidence intervals. Heterogeneity will be estimated  
42

43 299 using the  $I^2$  and  $\tau^2$  statistics<sup>35</sup>.  
44  
45

46  
47  
48  
49 300 Network meta-analysis model  
50

51  
52  
53 301 We will fit a multivariate meta-analysis contrast-based model within a frequentist framework  
54

55 302 using the network package in Stata<sup>36</sup>. We will assume common heterogeneity across the  
56  
57  
58  
59  
60

1  
2  
3 303 trials.  
4  
5

6  
7 304 Geometry of the network  
8  
9

10 305 We will generate a network diagram, separately for efficacy and safety, to visualise the  
11  
12 306 network of intervention modalities. The nodes (or intervention modalities) will represent the  
13  
14 307 total number of trials in each treatment group; the larger the size of the node the larger the  
15  
16 308 sample size. The edges of the lines connecting each node will represent the precision of the  
17  
18 309 evidence, i.e., the thicker the line the more precise evidence. Figure 1 shows an example of the  
19  
20 310 possible network structure with the major intervention modalities included.  
21  
22  
23  
24

25  
26 311 **<insert figure 1 here>**  
27  
28  
29

30 312 Assessment of transitivity in the network  
31  
32

33  
34 313 The transitivity assumption, which underpins the method of a network meta-analysis, requires  
35  
36 314 that the characteristics associated with the effect of the intervention are similar across the  
37  
38 315 included trials<sup>18</sup>. Participant characteristics (for example, age, sex, type of MS, level of  
39  
40 316 disability, and years since diagnosis of MS) could indicate violation of the transitivity  
41  
42 317 assumption<sup>18</sup>. To assess this requirement of the transitivity assumption the characteristics of  
43  
44 318 the participants recruited into each trial will be summarised and compared. If this requirement  
45  
46 319 of the transitivity assumption is thought to be violated, we will undertake narrative synthesis  
47  
48 320 of the data (described below) and possibly pair wise meta-analyses (described above). If we  
49  
50 321 find no reason to suggest that violation of the transitivity assumption, we will synthesise the  
51  
52 322 available evidence using network meta-analysis techniques. We will fit a random effects  
53  
54  
55  
56  
57  
58  
59  
60

1  
2  
3 323 network meta-analysis model in a frequentist framework and assume a common heterogeneity  
4  
5 324 parameter across the eligible trials. The random effects model assumes that the variation  
6  
7 325 between trials could be a result of heterogeneity and not from sampling variation<sup>18 36</sup>.

## 11 326 Summary Statistics and presentation of results

15 327 We will present forest plots that will include pooled estimates from the direct and mixed  
16  
17 328 intervention effects and league tables with the summary standardised mean differences or  
18  
19 329 odds ratios for all pairwise comparisons<sup>37 38</sup>. We will use a predictive interval plot to show the  
20  
21 330 grouped intervention modality standardised mean differences or odds ratios in a future trial<sup>37</sup>.  
22  
23 331 We will then obtain a hierarchy of the intervention modalities using the surface under the  
24  
25 332 cumulative ranking curve (SUCRA). SUCRA uses probabilities to determine which  
26  
27 333 intervention modality is most likely to be the most effective at reducing depressive symptoms  
28  
29 334 in people with MS. A probability of 1 (or 100%) is indicative of the stated intervention  
30  
31 335 modality being the most effective intervention modality, conversely, a probability of 0 (or 0%)  
32  
33 336 is indicative of the stated intervention modality being the least effective<sup>38</sup>.

## 39 337 Assessment of inconsistency

43 338 Consistency is a measure of the agreement between direct evidence and indirect evidence. If  
44  
45 339 inconsistency occurs in a network it may suggest that there is significant heterogeneity and  
46  
47 340 that the transitivity assumption could be violated<sup>18 34</sup>. Using the network meta-analysis  
48  
49 341 package in Stata<sup>36</sup> a consistency and an inconsistency model can be separately fitted to assess  
50  
51 342 whether the direct and indirect evidence are in agreement for each outcome. These models can  
52  
53 343 provide information to help ascertain if the direct and indirect evidence are in statistical



1  
2  
3 344 agreement<sup>39</sup>. If there is evidence of inconsistency in the network, we will use the side-  
4  
5 345 splitting approach to identify if there is a specific modality of interventions that contribute to  
6  
7 346 inconsistency in the network<sup>36,39</sup>. This will enable us to further investigate the possible  
8  
9 347 sources of inconsistency<sup>40</sup>.

#### 13 14 348 Subgroup analysis

15  
16  
17 349 We will conduct separate subgroup analyses for the efficacy and the safety outcome if there is  
18  
19 350 substantial heterogeneity or inconsistency and the data allows this.

20  
21  
22  
23 351 For the efficacy outcome, we will assess the following subgroups:

- 24  
25  
26  
27 352 – Year of baseline recruitment; to determine if treatments have become more  
28  
29 353 effective over time.
- 30  
31  
32 354 – Severity of depression at baseline (i.e., trials that recruited based on level of  
33  
34 355 depression vs trials that did not); to determine whether interventions are efficacious  
35  
36 356 when a level of depressive symptoms is present.
- 37  
38  
39 357 – Comparison of self-reported outcome measures vs clinical assessment; to  
40  
41 358 determine if there is a difference in the efficacy of the treatment due to the  
42  
43 359 measurement of the outcome.
- 44  
45  
46 360 – Level of disability at enrolment (e.g., as measured by Patient determined disease  
47  
48 361 steps, Expanded Disability Disease Scale: categorised in mild, moderate or severe  
49  
50 362 disability); to determine if level of disability is associated with the efficacy of the  
51  
52 363 intervention.
- 53  
54  
55 364 – Whether the intervention was conducted in a dose according to guidelines that  
56  
57  
58  
59  
60

1  
2  
3 365 exist for that type of interventions (e.g., exercise guidelines for people with MS);  
4  
5 366 to determine if a minimum dose is associated with the efficacy of the intervention.  
6

7  
8 367 For the safety and tolerability outcome we will undertake subgroup analyses by year of  
9  
10 368 baseline recruitment and level of disability at enrolment.  
11

12 369

13  
14 370 Assessment of small study effects  
15

16  
17  
18 371 We will use the comparison-adjusted<sup>37</sup> and contour-enhanced<sup>41</sup> funnel plots to investigate  
19  
20 372 whether results in imprecise trials differ from those in more precise trials. Network meta-  
21  
22 373 regression models will be used to investigate associations between study sample size and  
23  
24 374 effect size<sup>42</sup>.  
25  
26  
27  
28

29 375 Narrative synthesis  
30

31  
32  
33 376 If we are unable to conduct a NMA or pairwise meta-analyses we plan to conduct a narrative  
34  
35 377 synthesis to assess which interventions reported the outcomes of interest and if there were any  
36  
37 378 patterns relating to specific interventions, or gaps in the literature.  
38  
39  
40

## 41 379 **ETHICS AND DISSEMINATION**

42  
43  
44

45 380 Ethical approval is not needed for a systematic review and network meta-analysis as we will  
46  
47 381 use aggregated data from previously published randomised trials. The dissemination of the  
48  
49 382 results of the systematic review and network meta-analysis will include publishing in a peer  
50  
51 383 reviewed journals to apprise MS researchers and clinicians, and people with MS. The results  
52  
53 384 of the systematic review and network meta-analysis have the potential to inform future  
54  
55  
56  
57  
58  
59  
60

1  
2  
3 385 treatment guidelines for depression in people with MS. Further, the review may highlight any  
4  
5 386 gaps in the literature and provide recommendations for the conduct and reporting of future  
6  
7  
8 387 randomised trials.  
9

## 10 11 388 **AUTHORS CONTRIBUTIONS**

12  
13  
14  
15 389 AK and CHM conceived the study. AK, CHM, JL, SC, YL, AGK and AM contributed to the  
16  
17 390 study design. JL drafted the manuscript and AK, CHM, SC, YL edited the manuscript. All  
18  
19 391 authors read and approved the final manuscript.  
20  
21  
22

## 23 24 392 **FUNDING**

25  
26 393 CHM was funded by an Early Career Fellowship from the National Health and Medical  
27  
28 394 Research Council (ID: 1120014) and a Fellowship from Multiple Sclerosis Research Australia  
29  
30 395 (ID 20-216).  
31  
32

## 33 396 **CONFLICT OF INTEREST**

34  
35  
36  
37 397 The authors declare no conflict of interest.  
38  
39

## 40 41 398 **REFERENCES**

- 42  
43  
44 399 1. Hunter SF. Overview and diagnosis of multiple sclerosis. *Am J Manag Care* 2016;22(6  
45 400 Suppl):s141-50. [published Online First: 2016/06/30]  
46 401 2. Feinstein A, Magalhaes S, Richard JF, et al. The link between multiple sclerosis and  
47 402 depression. *Nat Rev Neurol* 2014;10(9):507-17. doi: 10.1038/nrneurol.2014.139  
48 403 [published Online First: 2014/08/13]  
49 404 3. Arnett PA, Barwick FH, Beeney JE. Depression in multiple sclerosis: review and  
50 405 theoretical proposal. *J Int Neuropsychol Soc* 2008;14(5):691-724. doi:  
51 406 10.1017/s1355617708081174 [published Online First: 2008/09/04]  
52 407 4. Tarrants M, Oleen-Burkey M, Castelli-Haley J, et al. The impact of comorbid depression on  
53 408 adherence to therapy for multiple sclerosis. *Mult Scler Int* 2011;2011:271321. doi:  
54 409 10.1155/2011/271321.  
55  
56  
57  
58  
59  
60

- 1  
2  
3 410 5. Ploughman M, Wallack EM, Chatterjee T, et al. Under-treated depression negatively  
4 411 impacts lifestyle behaviors, participation and health-related quality of life among older  
5 412 people with multiple sclerosis. *Mult Scler Relat Disord* 2020;40:101919. doi:  
6 413 10.1016/j.msard.2019.101919.
- 7  
8 414 6. American Psychiatric Association. Diagnostic and Statistical Manual of Mental Disorders  
9 415 (DSM-5®). USA: American Psychiatric Association Publishing 2019.
- 10 416 7. Boeschoten RE, Braamse AMJ, Beekman ATF, et al. Prevalence of depression and anxiety  
11 417 in Multiple Sclerosis: A systematic review and meta-analysis. *J Neurol Sci*  
12 418 2017;372:331-41. doi: 10.1016/j.jns.2016.11.067.
- 13 419 8. Grech LB, Haines S, Marck CH, et al. Untreated and under-treated depressive symptoms in  
14 420 people with multiple sclerosis in an Australian context: A secondary analysis.  
15 421 *Collegian* 2020 doi: <https://doi.org/10.1016/j.colegn.2020.02.010>.
- 16 422 9. Feinstein A. Multiple sclerosis and depression. *Mult Scler* 2011;17(11):1276-81. doi:  
17 423 10.1177/1352458511417835.
- 18 424 10. Goldman Consensus G. The Goldman Consensus statement on depression in multiple  
19 425 sclerosis. *Mult Scler* 2005;11(3):328-37. doi: 10.1191/1352458505ms1162oa.
- 20 426 11. Toward Optimized Practice (TOP) MS in Depression Working Group. Identification and  
21 427 management of depression in multiple sclerosis: Clinical practice guideline. 2015;  
22 428 2020(15 May 2020). <http://www.topalbertadoctors.org>.
- 23 429 12. Kolahkaj B, Zargar F. Effect of Mindfulness-Based Stress Reduction on Anxiety,  
24 430 Depression and Stress in Women With Multiple Sclerosis. *Nurs* 2015;4(4):e29655.  
25 431 doi: <https://dx.doi.org/10.17795/nmsjournal29655>.
- 26 432 13. Fleming KM, Coote SB, Herring MP. The feasibility of Pilates to improve symptoms of  
27 433 anxiety, depression, and fatigue among people with Multiple Sclerosis: An eight-week  
28 434 randomized controlled pilot trial. *Psychology of Sport and Exercise* 2019;45:9. doi:  
29 435 10.1016/j.psychsport.2019.101573.
- 30 436 14. Minden SL, Feinstein A, Kalb RC, et al. Evidence-based guideline: assessment and  
31 437 management of psychiatric disorders in individuals with MS: report of the Guideline  
32 438 Development Subcommittee of the American Academy of Neurology. *Neurology*  
33 439 2014;82(2):174-81. doi: 10.1212/wnl.000000000000013.
- 34 440 15. Dalgas U, Stenager E, Sloth M, et al. The effect of exercise on depressive symptoms in  
35 441 multiple sclerosis based on a meta-analysis and critical review of the literature. *Eur J*  
36 442 *Neurol* 2015;22(3):443-e34. doi: 10.1111/ene.12576.
- 37 443 16. Ensari I, Motl RW, Pilutti LA. Exercise training improves depressive symptoms in people  
38 444 with multiple sclerosis: results of a meta-analysis. *J Psychosom Res* 2014;76(6):465-  
39 445 71. doi: 10.1016/j.jpsychores.2014.03.014.
- 40 446 17. Simpson R, Simpson S, Ramparsad N, et al. Mindfulness-based interventions for mental  
41 447 well-being among people with multiple sclerosis: a systematic review and meta-  
42 448 analysis of randomised controlled trials. *J Neurol Neurosurg Psychiatry*  
43 449 2019;90(9):1051-58. doi: 10.1136/jnnp-2018-320165.
- 44 450 18. Rouse B, Chaimani A, Li T. Network meta-analysis: an introduction for clinicians. *Intern*  
45 451 *Emerg Med* 2017;12(1):103-11. doi: 10.1007/s11739-016-1583-7.
- 46 452 19. Salanti G. Indirect and mixed-treatment comparison, network, or multiple-treatments  
47 453 meta-analysis: many names, many benefits, many concerns for the next generation  
48 454 evidence synthesis tool. *Res Synth Methods* 2012;3(2):80-97. doi: 10.1002/jrsm.1037.

- 1  
2  
3 455 20. Higgins JPT, Thomas J, Chandler J, Cumpston M, Li T, Page MJ, Welch VA (editors).  
4 456 Cochrane Handbook for Systematic Reviews of Interventions version 6.3 (updated  
5 457 February 2022). Cochrane, 2022. Available from  
6 458 [www.training.cochrane.org/handbook](http://www.training.cochrane.org/handbook).
- 7  
8 459 21. Hutton B, Salanti G, Caldwell DM, et al. The PRISMA extension statement for reporting  
9 460 of systematic reviews incorporating network meta-analyses of health care  
10 461 interventions: checklist and explanations. *Ann Intern Med* 2015;162(11):777-84. doi:  
11 462 10.7326/M14-2385.
- 12 463 22. Gold SM, Enck P, Hasselmann H, et al. Control conditions for randomised trials of  
13 464 behavioural interventions in psychiatry: a decision framework. *The Lancet Psychiatry*  
14 465 2017;4(9):725-32. doi: [https://doi.org/10.1016/S2215-0366\(17\)30153-0](https://doi.org/10.1016/S2215-0366(17)30153-0).
- 15 466 23. Patten SB. Current perspectives on co-morbid depression and multiple sclerosis. *Expert*  
16 467 *Review of Neurotherapeutics* 2020;20(8):867-74. doi:  
17 468 10.1080/14737175.2020.1806062
- 18 469 24. Ioannidis JP, Evans SJ, Gøtzsche PC, et al. Better reporting of harms in randomized trials:  
19 470 an extension of the CONSORT statement. *Ann Intern Med* 2004;141(10):781-8. doi:  
20 471 10.7326/0003-4819-141-10-200411160-00009.
- 21 472 25. Edwards IR, Aronson JK. Adverse drug reactions: definitions, diagnosis, and  
22 473 management. *Lancet* 2000;356(9237):1255-9. doi: 10.1016/s0140-6736(00)02799-9.
- 23 474 26. Duggan C, Parry G, McMurrin M, et al. The recording of adverse events from  
24 475 psychological treatments in clinical trials: evidence from a review of NIHR-funded  
25 476 trials. *Trials* 2014;15:335. doi: 10.1186/1745-6215-15-335.
- 26 477 27. Ory M, Resnick B, Jordan PJ, et al. Screening, safety, and adverse events in physical  
27 478 activity interventions: collaborative experiences from the behavior change consortium.  
28 479 *Ann Behav Med* 2005;29 Suppl:20-8. doi: 10.1207/s15324796abm2902s\_5.
- 29 480 28. Cipriani A, Zhou X, Del Giovane C, et al. Comparative efficacy and tolerability of  
30 481 antidepressants for major depressive disorder in children and adolescents: a network  
31 482 meta-analysis. *The Lancet* 2016;388(10047):881-90. doi:  
32 483 [https://doi.org/10.1016/S0140-6736\(16\)30385-3](https://doi.org/10.1016/S0140-6736(16)30385-3).
- 33 484 29. The EndNote Team (2013). EndNote. Philadelphia, PA, Clarivate Analytics.
- 34 485 30. Covidence systematic review software, Veritas Health Innovation, Melbourne, Australia.  
35 486 Available at [www.covidence.org](http://www.covidence.org).
- 36 487 31. Hoffmann TC, Oxman AD, Ioannidis JP, et al. Enhancing the usability of systematic  
37 488 reviews by improving the consideration and description of interventions. *BMJ*  
38 489 2017;358:j2998. doi: 10.1136/bmj.j2998.
- 39 490 32. Sterne JAC SJ, Page MJ, Elbers RG, Blencowe NS, Boutron I, Cates CJ, Cheng H-Y,  
40 491 Corbett MS, Eldridge SM, Hernán MA, Hopewell S, Hróbjartsson A, Junqueira DR,  
41 492 Jüni P, Kirkham JJ, Lasserson T, Li T, McAleenan A, Reeves BC, Shepperd S, Shrier  
42 493 I, Stewart LA, Tilling K, White IR, Whiting PF, Higgins JPT. RoB 2: a revised tool for  
43 494 assessing risk of bias in randomised trials. *BMJ* 2019(366):14898.
- 44 495 33. Higgins JP, Li T, Deeks JJ. Chapter 6: Choosing effect measures and computing estimates  
45 496 of effect. In: Higgins JPT, Thomas J, Chandler J, Cumpston M, Li T, Page MJ, Welch  
46 497 VA (editors). Cochrane Handbook for Systematic Reviews of Interventions version 6.0  
47 498 Cochrane, 2019.

- 1  
2  
3 499 34. Chaimani A, Caldwell DM, Li T, et al. Additional considerations are required when  
4 500 preparing a protocol for a systematic review with multiple interventions. *J Clin*  
5 501 *Epidemiol* 2017;83:65-74. doi: 10.1016/j.jclinepi.2016.11.015.  
6  
7 502 35. Higgins JPT, Thompson SG, Deeks JJ, et al. Measuring inconsistency in meta-analyses.  
8 503 *BMJ* 2003;327(7414):557-60. doi: 10.1136/bmj.327.7414.557.  
9 504 36. White IR. Network meta-analysis. *Stata Journal* 2015;15(4):951-85.  
10 505 37. Chaimani A, Higgins JP, Mavridis D, et al. Graphical tools for network meta-analysis in  
11 506 STATA. *PLoS One* 2013;8(10):e76654. doi: 10.1371/journal.pone.0076654.  
12 507 38. Salanti G, Ades AE, Ioannidis JP. Graphical methods and numerical summaries for  
13 508 presenting results from multiple-treatment meta-analysis: an overview and tutorial. *J*  
14 509 *Clin Epidemiol* 2011;64(2):163-71. doi: 10.1016/j.jclinepi.2010.03.016.  
15 510 39. White IR, Barrett JK, Jackson D, et al. Consistency and inconsistency in network meta-  
16 511 analysis: model estimation using multivariate meta-regression. *Res Synth Methods*  
17 512 2012;3(2):111-25. doi: 10.1002/jrsm.1045.  
18 513 40. Dias S, Welton NJ, Caldwell DM, et al. Checking consistency in mixed treatment  
19 514 comparison meta-analysis. *Stat Med* 2010;29(7-8):932-44. doi: 10.1002/sim.3767.  
20 515 41. Peters JL, Sutton AJ, Jones DR, et al. Contour-enhanced meta-analysis funnel plots help  
21 516 distinguish publication bias from other causes of asymmetry. *J Clin Epidemiol*  
22 517 2008;61(10):991-6. doi: 10.1016/j.jclinepi.2007.11.010.  
23 518 42. Chaimani A, Salanti G. Using network meta-analysis to evaluate the existence of small-  
24 519 study effects in a network of interventions. *Res Synth Methods* 2012;3(2):161-76. doi:  
25 520 10.1002/jrsm.57.  
26  
27  
28  
29

30 521

31  
32  
33  
34 522  
35  
36

37 523 **FIGURE LEGEND:**

38  
39  
40  
41 524 Figure 1: The possible network structure for the major categories of interventions. Comparator  
42  
43 525 group(s) may be split into multiple nodes as outlined in the comparator group section.  
44  
45  
46

47 526  
48  
49  
50  
51  
52  
53  
54  
55  
56  
57  
58  
59  
60

1  
2  
3  
4  
5  
6  
7  
8  
9  
10  
11  
12  
13  
14  
15  
16  
17  
18  
19  
20  
21  
22  
23  
24  
25  
26  
27  
28  
29  
30  
31  
32  
33  
34  
35  
36  
37  
38  
39  
40  
41  
42  
43  
44  
45  
46  
47  
48  
49  
50  
51  
52  
53  
54  
55  
56  
57  
58  
59  
60

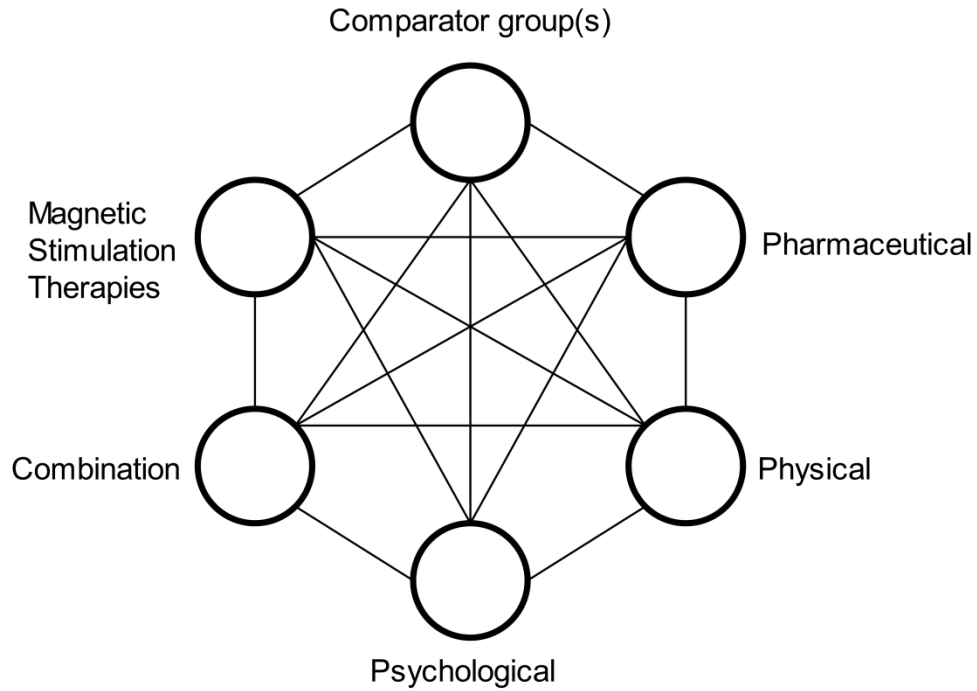

Figure 1: The possible network structure for the major categories of interventions. Comparator group(s) may be split into multiple nodes as outlined in the comparator group section.

2053x1443mm (72 x 72 DPI)



1  
2  
3  
4  
5  
6  
7  
8

## SUPPLEMENTARY FILE 1:

9  
10  
11  
12  
13  
14  
15

**Table 1: PRISMA-NMA guidelines checklist.**

16  
17  
18  
19  
20  
21  
22  
23  
24  
25  
26  
27  
28  
29  
30  
31  
32  
33

PRISMA NMA Checklist of Items to Include When Reporting A Systematic Review Involving a Network Meta-analysis

| Section/Topic             | Item # | Checklist Item                                                                                                                                                                                                                                                                                                                                                                                                                                                                                                                                                                                                                                                                                                                                                                          | Reported on Page # |
|---------------------------|--------|-----------------------------------------------------------------------------------------------------------------------------------------------------------------------------------------------------------------------------------------------------------------------------------------------------------------------------------------------------------------------------------------------------------------------------------------------------------------------------------------------------------------------------------------------------------------------------------------------------------------------------------------------------------------------------------------------------------------------------------------------------------------------------------------|--------------------|
| <b>TITLE</b>              |        |                                                                                                                                                                                                                                                                                                                                                                                                                                                                                                                                                                                                                                                                                                                                                                                         |                    |
| Title                     | 1      | Identify the report as a systematic review <i>incorporating a network meta-analysis (or related form of meta-analysis)</i> .                                                                                                                                                                                                                                                                                                                                                                                                                                                                                                                                                                                                                                                            | 1                  |
| <b>ABSTRACT</b>           |        |                                                                                                                                                                                                                                                                                                                                                                                                                                                                                                                                                                                                                                                                                                                                                                                         |                    |
| Structured summary        | 2      | Provide a structured summary including, as applicable:<br><b>Background:</b> main objectives<br><b>Methods:</b> data sources; study eligibility criteria, participants, and interventions; study appraisal; and <i>synthesis methods, such as network meta-analysis</i> .<br><b>Results:</b> number of studies and participants identified; summary estimates with corresponding confidence/credible intervals; <i>treatment rankings may also be discussed. Authors may choose to summarize pairwise comparisons against a chosen treatment included in their analyses for brevity.</i><br><b>Discussion/Conclusions:</b> limitations; conclusions and implications of findings.<br><b>Other:</b> primary source of funding; systematic review registration number with registry name. | 2                  |
| <b>INTRODUCTION</b>       |        |                                                                                                                                                                                                                                                                                                                                                                                                                                                                                                                                                                                                                                                                                                                                                                                         |                    |
| Rationale                 | 3      | Describe the rationale for the review in the context of what is already known, <i>including mention of why a network meta-analysis has been conducted</i> .                                                                                                                                                                                                                                                                                                                                                                                                                                                                                                                                                                                                                             | 4                  |
| Objectives                | 4      | Provide an explicit statement of questions being addressed, with reference to participants, interventions, comparisons, outcomes, and study design (PICOS).                                                                                                                                                                                                                                                                                                                                                                                                                                                                                                                                                                                                                             | 6                  |
| <b>METHODS</b>            |        |                                                                                                                                                                                                                                                                                                                                                                                                                                                                                                                                                                                                                                                                                                                                                                                         |                    |
| Protocol and registration | 5      | Indicate whether a review protocol exists and if and where it can be accessed (e.g., Web address); and, if available, provide registration information, including registration number.                                                                                                                                                                                                                                                                                                                                                                                                                                                                                                                                                                                                  | 6                  |
| Eligibility criteria      | 6      | Specify study characteristics (e.g., PICOS, length of follow-up) and report characteristics (e.g., years considered, language, publication status) used as criteria for eligibility, giving rationale. <i>Clearly describe eligible treatments included in the treatment network, and note whether any have been clustered or merged into the same node (with justification)</i> .                                                                                                                                                                                                                                                                                                                                                                                                      | 6-10               |
| Information sources       | 7      | Describe all information sources (e.g., databases with dates of coverage, contact with study authors to identify additional studies) in the search and date last searched.                                                                                                                                                                                                                                                                                                                                                                                                                                                                                                                                                                                                              | 9                  |
| Search                    | 8      | Present full electronic search strategy for at least one database,<br>For peer review only - <a href="http://bmjopen.bmj.com/site/about/guidelines.xhtml">http://bmjopen.bmj.com/site/about/guidelines.xhtml</a>                                                                                                                                                                                                                                                                                                                                                                                                                                                                                                                                                                        | Supplementary file |

58  
59  
60



|    |                                        |           |                                                                                                                                                                                                                                                                                                                                                                                                                                                   |       |
|----|----------------------------------------|-----------|---------------------------------------------------------------------------------------------------------------------------------------------------------------------------------------------------------------------------------------------------------------------------------------------------------------------------------------------------------------------------------------------------------------------------------------------------|-------|
| 1  |                                        |           | including any limits used, such that it could be repeated.                                                                                                                                                                                                                                                                                                                                                                                        |       |
| 2  | Study selection                        | 9         | State the process for selecting studies (i.e., screening, eligibility, included in systematic review, and, if applicable, included in the meta-analysis).                                                                                                                                                                                                                                                                                         | 10-11 |
| 3  |                                        |           |                                                                                                                                                                                                                                                                                                                                                                                                                                                   |       |
| 4  |                                        |           |                                                                                                                                                                                                                                                                                                                                                                                                                                                   |       |
| 5  |                                        |           |                                                                                                                                                                                                                                                                                                                                                                                                                                                   |       |
| 6  |                                        |           |                                                                                                                                                                                                                                                                                                                                                                                                                                                   |       |
| 7  | Data collection process                | 10        | Describe method of data extraction from reports (e.g., piloted forms, independently, in duplicate) and any processes for obtaining and confirming data from investigators.                                                                                                                                                                                                                                                                        | 11-12 |
| 8  |                                        |           |                                                                                                                                                                                                                                                                                                                                                                                                                                                   |       |
| 9  |                                        |           |                                                                                                                                                                                                                                                                                                                                                                                                                                                   |       |
| 10 | Data items                             | 11        | List and define all variables for which data were sought (e.g., PICOS, funding sources) and any assumptions and simplifications made.                                                                                                                                                                                                                                                                                                             | 11-12 |
| 11 |                                        |           |                                                                                                                                                                                                                                                                                                                                                                                                                                                   |       |
| 12 |                                        |           |                                                                                                                                                                                                                                                                                                                                                                                                                                                   |       |
| 13 | <b>Geometry of the network</b>         | <b>S1</b> | Describe methods used to explore the geometry of the treatment network under study and potential biases related to it. This should include how the evidence base has been graphically summarized for presentation, and what characteristics were compiled and used to describe the evidence base to readers.                                                                                                                                      | 15    |
| 14 |                                        |           |                                                                                                                                                                                                                                                                                                                                                                                                                                                   |       |
| 15 |                                        |           |                                                                                                                                                                                                                                                                                                                                                                                                                                                   |       |
| 16 |                                        |           |                                                                                                                                                                                                                                                                                                                                                                                                                                                   |       |
| 17 |                                        |           |                                                                                                                                                                                                                                                                                                                                                                                                                                                   |       |
| 18 |                                        |           |                                                                                                                                                                                                                                                                                                                                                                                                                                                   |       |
| 19 |                                        |           |                                                                                                                                                                                                                                                                                                                                                                                                                                                   |       |
| 20 | Risk of bias within individual studies | 12        | Describe methods used for assessing risk of bias of individual studies (including specification of whether this was done at the study or outcome level), and how this information is to be used in any data synthesis.                                                                                                                                                                                                                            | 12-13 |
| 21 |                                        |           |                                                                                                                                                                                                                                                                                                                                                                                                                                                   |       |
| 22 |                                        |           |                                                                                                                                                                                                                                                                                                                                                                                                                                                   |       |
| 23 |                                        |           |                                                                                                                                                                                                                                                                                                                                                                                                                                                   |       |
| 24 |                                        |           |                                                                                                                                                                                                                                                                                                                                                                                                                                                   |       |
| 25 | Summary measures                       | 13        | State the principal summary measures (e.g., risk ratio, difference in means). <i>Also describe the use of additional summary measures assessed, such as treatment rankings and surface under the cumulative ranking curve (SUCRA) values, as well as modified approaches used to present summary findings from meta-analyses.</i>                                                                                                                 | 16    |
| 26 |                                        |           |                                                                                                                                                                                                                                                                                                                                                                                                                                                   |       |
| 27 |                                        |           |                                                                                                                                                                                                                                                                                                                                                                                                                                                   |       |
| 28 |                                        |           |                                                                                                                                                                                                                                                                                                                                                                                                                                                   |       |
| 29 |                                        |           |                                                                                                                                                                                                                                                                                                                                                                                                                                                   |       |
| 30 |                                        |           |                                                                                                                                                                                                                                                                                                                                                                                                                                                   |       |
| 31 | Planned methods of analysis            | 14        | Describe the methods of handling data and combining results of studies for each network meta-analysis. This should include, but not be limited to: <ul style="list-style-type: none"> <li>• <i>Handling of multi-arm trials;</i></li> <li>• <i>Selection of variance structure;</i></li> <li>• <i>Selection of prior distributions in Bayesian analyses; and</i></li> <li>• <i>Assessment of model fit.</i></li> </ul>                            | 14-18 |
| 32 |                                        |           |                                                                                                                                                                                                                                                                                                                                                                                                                                                   |       |
| 33 |                                        |           |                                                                                                                                                                                                                                                                                                                                                                                                                                                   |       |
| 34 |                                        |           |                                                                                                                                                                                                                                                                                                                                                                                                                                                   |       |
| 35 |                                        |           |                                                                                                                                                                                                                                                                                                                                                                                                                                                   |       |
| 36 |                                        |           |                                                                                                                                                                                                                                                                                                                                                                                                                                                   |       |
| 37 |                                        |           |                                                                                                                                                                                                                                                                                                                                                                                                                                                   |       |
| 38 |                                        |           |                                                                                                                                                                                                                                                                                                                                                                                                                                                   |       |
| 39 |                                        |           |                                                                                                                                                                                                                                                                                                                                                                                                                                                   |       |
| 40 | <b>Assessment of Inconsistency</b>     | <b>S2</b> | Describe the statistical methods used to evaluate the agreement of direct and indirect evidence in the treatment network(s) studied. Describe efforts taken to address its presence when found.                                                                                                                                                                                                                                                   | 15-16 |
| 41 |                                        |           |                                                                                                                                                                                                                                                                                                                                                                                                                                                   |       |
| 42 |                                        |           |                                                                                                                                                                                                                                                                                                                                                                                                                                                   |       |
| 43 |                                        |           |                                                                                                                                                                                                                                                                                                                                                                                                                                                   |       |
| 44 | Risk of bias across studies            | 15        | Specify any assessment of risk of bias that may affect the cumulative evidence (e.g., publication bias, selective reporting within studies).                                                                                                                                                                                                                                                                                                      | 18    |
| 45 |                                        |           |                                                                                                                                                                                                                                                                                                                                                                                                                                                   |       |
| 46 |                                        |           |                                                                                                                                                                                                                                                                                                                                                                                                                                                   |       |
| 47 | Additional analyses                    | 16        | Describe methods of additional analyses if done, indicating which were pre-specified. This may include, but not be limited to, the following: <ul style="list-style-type: none"> <li>• Sensitivity or subgroup analyses;</li> <li>• Meta-regression analyses;</li> <li>• <i>Alternative formulations of the treatment network; and</i></li> <li>• <i>Use of alternative prior distributions for Bayesian analyses (if applicable).</i></li> </ul> | 17-18 |
| 48 |                                        |           |                                                                                                                                                                                                                                                                                                                                                                                                                                                   |       |
| 49 |                                        |           |                                                                                                                                                                                                                                                                                                                                                                                                                                                   |       |
| 50 |                                        |           |                                                                                                                                                                                                                                                                                                                                                                                                                                                   |       |
| 51 |                                        |           |                                                                                                                                                                                                                                                                                                                                                                                                                                                   |       |
| 52 |                                        |           |                                                                                                                                                                                                                                                                                                                                                                                                                                                   |       |
| 53 |                                        |           |                                                                                                                                                                                                                                                                                                                                                                                                                                                   |       |
| 54 |                                        |           |                                                                                                                                                                                                                                                                                                                                                                                                                                                   |       |
| 55 |                                        |           |                                                                                                                                                                                                                                                                                                                                                                                                                                                   |       |
| 56 |                                        |           |                                                                                                                                                                                                                                                                                                                                                                                                                                                   |       |
| 57 |                                        |           |                                                                                                                                                                                                                                                                                                                                                                                                                                                   |       |
| 58 |                                        |           |                                                                                                                                                                                                                                                                                                                                                                                                                                                   |       |
| 59 |                                        |           |                                                                                                                                                                                                                                                                                                                                                                                                                                                   |       |
| 60 |                                        |           |                                                                                                                                                                                                                                                                                                                                                                                                                                                   |       |

|    |                                          |           |                                                                                                                                                                                                                                                                                                                                                                                                                                                              |    |
|----|------------------------------------------|-----------|--------------------------------------------------------------------------------------------------------------------------------------------------------------------------------------------------------------------------------------------------------------------------------------------------------------------------------------------------------------------------------------------------------------------------------------------------------------|----|
| 1  | Study selection                          | 17        | Give numbers of studies screened, assessed for eligibility, and included in the review, with reasons for exclusions at each stage, ideally with a flow diagram.                                                                                                                                                                                                                                                                                              | NA |
| 2  |                                          |           |                                                                                                                                                                                                                                                                                                                                                                                                                                                              |    |
| 3  | <b>Presentation of network structure</b> | <b>S3</b> | Provide a network graph of the included studies to enable visualization of the geometry of the treatment network.                                                                                                                                                                                                                                                                                                                                            | NA |
| 4  |                                          |           |                                                                                                                                                                                                                                                                                                                                                                                                                                                              |    |
| 5  | <b>Summary of network geometry</b>       | <b>S4</b> | Provide a brief overview of characteristics of the treatment network. This may include commentary on the abundance of trials and randomized patients for the different interventions and pairwise comparisons in the network, gaps of evidence in the treatment network, and potential biases reflected by the network structure.                                                                                                                            | NA |
| 6  |                                          |           |                                                                                                                                                                                                                                                                                                                                                                                                                                                              |    |
| 7  |                                          |           |                                                                                                                                                                                                                                                                                                                                                                                                                                                              |    |
| 8  |                                          |           |                                                                                                                                                                                                                                                                                                                                                                                                                                                              |    |
| 9  |                                          |           |                                                                                                                                                                                                                                                                                                                                                                                                                                                              |    |
| 10 |                                          |           |                                                                                                                                                                                                                                                                                                                                                                                                                                                              |    |
| 11 | Study characteristics                    | 18        | For each study, present characteristics for which data were extracted (e.g., study size, PICOS, follow-up period) and provide the citations.                                                                                                                                                                                                                                                                                                                 | NA |
| 12 |                                          |           |                                                                                                                                                                                                                                                                                                                                                                                                                                                              |    |
| 13 |                                          |           |                                                                                                                                                                                                                                                                                                                                                                                                                                                              |    |
| 14 | Risk of bias within studies              | 19        | Present data on risk of bias of each study and, if available, any outcome level assessment.                                                                                                                                                                                                                                                                                                                                                                  | NA |
| 15 |                                          |           |                                                                                                                                                                                                                                                                                                                                                                                                                                                              |    |
| 16 |                                          |           |                                                                                                                                                                                                                                                                                                                                                                                                                                                              |    |
| 17 | Results of individual studies            | 20        | For all outcomes considered (benefits or harms), present, for each study: 1) simple summary data for each intervention group, and 2) effect estimates and confidence intervals. <i>Modified approaches may be needed to deal with information from larger networks.</i>                                                                                                                                                                                      | NA |
| 18 |                                          |           |                                                                                                                                                                                                                                                                                                                                                                                                                                                              |    |
| 19 |                                          |           |                                                                                                                                                                                                                                                                                                                                                                                                                                                              |    |
| 20 |                                          |           |                                                                                                                                                                                                                                                                                                                                                                                                                                                              |    |
| 21 |                                          |           |                                                                                                                                                                                                                                                                                                                                                                                                                                                              |    |
| 22 | Synthesis of results                     | 21        | Present results of each meta-analysis done, including confidence/credible intervals. <i>In larger networks, authors may focus on comparisons versus a particular comparator (e.g. placebo or standard care), with full findings presented in an appendix. League tables and forest plots may be considered to summarize pairwise comparisons.</i> If additional summary measures were explored (such as treatment rankings), these should also be presented. | NA |
| 23 |                                          |           |                                                                                                                                                                                                                                                                                                                                                                                                                                                              |    |
| 24 |                                          |           |                                                                                                                                                                                                                                                                                                                                                                                                                                                              |    |
| 25 |                                          |           |                                                                                                                                                                                                                                                                                                                                                                                                                                                              |    |
| 26 |                                          |           |                                                                                                                                                                                                                                                                                                                                                                                                                                                              |    |
| 27 |                                          |           |                                                                                                                                                                                                                                                                                                                                                                                                                                                              |    |
| 28 |                                          |           |                                                                                                                                                                                                                                                                                                                                                                                                                                                              |    |
| 29 |                                          |           |                                                                                                                                                                                                                                                                                                                                                                                                                                                              |    |
| 30 |                                          |           |                                                                                                                                                                                                                                                                                                                                                                                                                                                              |    |
| 31 | <b>Exploration for inconsistency</b>     | <b>S5</b> | Describe results from investigations of inconsistency. This may include such information as measures of model fit to compare consistency and inconsistency models, <i>P</i> values from statistical tests, or summary of inconsistency estimates from different parts of the treatment network.                                                                                                                                                              | NA |
| 32 |                                          |           |                                                                                                                                                                                                                                                                                                                                                                                                                                                              |    |
| 33 |                                          |           |                                                                                                                                                                                                                                                                                                                                                                                                                                                              |    |
| 34 |                                          |           |                                                                                                                                                                                                                                                                                                                                                                                                                                                              |    |
| 35 |                                          |           |                                                                                                                                                                                                                                                                                                                                                                                                                                                              |    |
| 36 | Risk of bias across studies              | 22        | Present results of any assessment of risk of bias across studies for the evidence base being studied.                                                                                                                                                                                                                                                                                                                                                        | NA |
| 37 |                                          |           |                                                                                                                                                                                                                                                                                                                                                                                                                                                              |    |
| 38 | Results of additional analyses           | 23        | Give results of additional analyses, if done (e.g., sensitivity or subgroup analyses, meta-regression analyses, <i>alternative network geometries studied, alternative choice of prior distributions for Bayesian analyses, and so forth</i> ).                                                                                                                                                                                                              | NA |
| 39 |                                          |           |                                                                                                                                                                                                                                                                                                                                                                                                                                                              |    |
| 40 |                                          |           |                                                                                                                                                                                                                                                                                                                                                                                                                                                              |    |
| 41 |                                          |           |                                                                                                                                                                                                                                                                                                                                                                                                                                                              |    |
| 42 |                                          |           |                                                                                                                                                                                                                                                                                                                                                                                                                                                              |    |
| 43 |                                          |           |                                                                                                                                                                                                                                                                                                                                                                                                                                                              |    |
| 44 |                                          |           |                                                                                                                                                                                                                                                                                                                                                                                                                                                              |    |
| 45 |                                          |           |                                                                                                                                                                                                                                                                                                                                                                                                                                                              |    |
| 46 |                                          |           |                                                                                                                                                                                                                                                                                                                                                                                                                                                              |    |
| 47 |                                          |           |                                                                                                                                                                                                                                                                                                                                                                                                                                                              |    |
| 48 |                                          |           |                                                                                                                                                                                                                                                                                                                                                                                                                                                              |    |
| 49 |                                          |           |                                                                                                                                                                                                                                                                                                                                                                                                                                                              |    |
| 50 |                                          |           |                                                                                                                                                                                                                                                                                                                                                                                                                                                              |    |
| 51 |                                          |           |                                                                                                                                                                                                                                                                                                                                                                                                                                                              |    |
| 52 |                                          |           |                                                                                                                                                                                                                                                                                                                                                                                                                                                              |    |
| 53 |                                          |           |                                                                                                                                                                                                                                                                                                                                                                                                                                                              |    |
| 54 |                                          |           |                                                                                                                                                                                                                                                                                                                                                                                                                                                              |    |
| 55 |                                          |           |                                                                                                                                                                                                                                                                                                                                                                                                                                                              |    |
| 56 |                                          |           |                                                                                                                                                                                                                                                                                                                                                                                                                                                              |    |
| 57 |                                          |           |                                                                                                                                                                                                                                                                                                                                                                                                                                                              |    |
| 58 |                                          |           |                                                                                                                                                                                                                                                                                                                                                                                                                                                              |    |
| 59 |                                          |           |                                                                                                                                                                                                                                                                                                                                                                                                                                                              |    |
| 60 |                                          |           |                                                                                                                                                                                                                                                                                                                                                                                                                                                              |    |

1  
2  
3  
4  
5  
6  
7  
8  
9  
10  
11  
12  
13  
14  
15  
16  
17  
18  
19  
20  
21  
22  
23  
24  
25  
26  
27  
28  
29  
30  
31  
32  
33  
34  
35  
36  
37  
38  
39  
40  
41  
42  
43  
44  
45  
46  
47  
48  
49  
50  
51  
52  
53  
54  
55  
56  
57  
58  
59  
60**DISCUSSION**

|                     |    |                                                                                                                                                                                                                                                                                                                                                                                                                                |    |
|---------------------|----|--------------------------------------------------------------------------------------------------------------------------------------------------------------------------------------------------------------------------------------------------------------------------------------------------------------------------------------------------------------------------------------------------------------------------------|----|
| Summary of evidence | 24 | Summarize the main findings, including the strength of evidence for each main outcome; consider their relevance to key groups (e.g., healthcare providers, users, and policy-makers).                                                                                                                                                                                                                                          | NA |
| Limitations         | 25 | Discuss limitations at study and outcome level (e.g., risk of bias), and at review level (e.g., incomplete retrieval of identified research, reporting bias). <i>Comment on the validity of the assumptions, such as transitivity and consistency. Comment on any concerns regarding network geometry (e.g., avoidance of certain comparisons).</i>                                                                            | 3  |
| Conclusions         | 26 | Provide a general interpretation of the results in the context of other evidence, and implications for future research.                                                                                                                                                                                                                                                                                                        | NA |
| <b>FUNDING</b>      |    |                                                                                                                                                                                                                                                                                                                                                                                                                                | 19 |
| Funding             | 27 | Describe sources of funding for the systematic review and other support (e.g., supply of data); role of funders for the systematic review. This should also include information regarding whether funding has been received from manufacturers of treatments in the network and/or whether some of the authors are content experts with professional conflicts of interest that could affect use of treatments in the network. |    |

PICOS = population, intervention, comparators, outcomes, study design.

\* Text in italics indicates wording specific to reporting of network meta-analyses that has been added to guidance from the PRISMA statement.

† Authors may wish to plan for use of appendices to present all relevant information in full detail for items in this

**SUPPLEMENTARY FILE 2:****Complete database search strategy**

Supplementary Table 1: Search strategy for databases EMBASE, APA PsycInfo, MEDLINE, Cochrane CENTRAL, searched through the Ovid platform.

|           | <b>Search terms</b>                                                                                                                                                                                                                                                |
|-----------|--------------------------------------------------------------------------------------------------------------------------------------------------------------------------------------------------------------------------------------------------------------------|
| <b>1</b>  | multiple sclerosis.ti,ab.                                                                                                                                                                                                                                          |
| <b>2</b>  | exp multiple sclerosis/                                                                                                                                                                                                                                            |
| <b>3</b>  | 1 or 2                                                                                                                                                                                                                                                             |
| <b>4</b>  | exp depression/                                                                                                                                                                                                                                                    |
| <b>5</b>  | (depress* or mood disorder or despair or misery or unhappiness or dysthymia or dysphor* or seasonal affective disorder or affective disorder or sadness or loss of pleasure).ti,ab.                                                                                |
| <b>6</b>  | 4 or 5                                                                                                                                                                                                                                                             |
| <b>7</b>  | exp randomized controlled trial/                                                                                                                                                                                                                                   |
| <b>8</b>  | ("random* control* trial*" or RCT or "random-allocation*" or "random allocation*" or "double-blind*" or "double blind*" or "single-blind*" or "single blind*" or mask* or random* or "control* stud*" or "control* clinical trial*" or "comparative stud*").ti,ab. |
| <b>9</b>  | 7 or 8                                                                                                                                                                                                                                                             |
| <b>10</b> | 3 AND 6 AND 9                                                                                                                                                                                                                                                      |

Supplementary Table 2: Search strategy for databases CINAHL through the Scopus platform\*, and Web of Science searched through the Web of Science platform\*.

|          | <b>Search Term</b>                                                                                                                                                                                                                                          |
|----------|-------------------------------------------------------------------------------------------------------------------------------------------------------------------------------------------------------------------------------------------------------------|
| <b>1</b> | “multiple sclerosis”                                                                                                                                                                                                                                        |
| <b>2</b> | depress* or “mood disorder*” or despair or misery or unhappiness or dysthymia or dysphor* or “seasonal affective disorder” or “affective disorder” or sadness or “loss of pleasure”                                                                         |
| <b>3</b> | ("random* control* trial*" or RCT or "random-allocation*" or "random allocation*" or "double-blind*" or "double blind*" or "single-blind*" or "single blind*" or mask* or random* or "control* stud*" or "control* clinical trial*" or "comparative stud*") |
| <b>4</b> | 1 AND 2 AND 3                                                                                                                                                                                                                                               |

\*The search strategy for Scopus platform and Web of Science platform is the same.

Supplementary Table 3: Search strategy for PEDro database.

|          | <b>Search line</b>                |
|----------|-----------------------------------|
| <b>1</b> | “multiple sclerosis” and depress* |

For peer review only

# BMJ Open

## Comparing the effectiveness, safety, and tolerability of interventions for depressive symptoms in people with multiple sclerosis: a systematic review and network meta-analysis protocol

|                                 |                                                                                                                                                                                                                                                                                                                                                                                                                                                                                                                                                                                                                                                                                                                                                                                                                                                                                                                                                                                                                                                          |
|---------------------------------|----------------------------------------------------------------------------------------------------------------------------------------------------------------------------------------------------------------------------------------------------------------------------------------------------------------------------------------------------------------------------------------------------------------------------------------------------------------------------------------------------------------------------------------------------------------------------------------------------------------------------------------------------------------------------------------------------------------------------------------------------------------------------------------------------------------------------------------------------------------------------------------------------------------------------------------------------------------------------------------------------------------------------------------------------------|
| Journal:                        | <i>BMJ Open</i>                                                                                                                                                                                                                                                                                                                                                                                                                                                                                                                                                                                                                                                                                                                                                                                                                                                                                                                                                                                                                                          |
| Manuscript ID                   | bmjopen-2021-055796.R2                                                                                                                                                                                                                                                                                                                                                                                                                                                                                                                                                                                                                                                                                                                                                                                                                                                                                                                                                                                                                                   |
| Article Type:                   | Protocol                                                                                                                                                                                                                                                                                                                                                                                                                                                                                                                                                                                                                                                                                                                                                                                                                                                                                                                                                                                                                                                 |
| Date Submitted by the Author:   | 18-May-2022                                                                                                                                                                                                                                                                                                                                                                                                                                                                                                                                                                                                                                                                                                                                                                                                                                                                                                                                                                                                                                              |
| Complete List of Authors:       | Lyons, Julia; The University of Melbourne School of Population and Global Health, Disability and Health Unit<br>Campese, Stephanie; The University of Melbourne School of Population and Global Health, Disability and Health Unit<br>Learmonth, Yvonne ; Murdoch University, Discipline of Exercise Science & Centre for Molecular Medicine and Innovative Therapeutics, Health Futures Institute; Perron Institute for Neurological and Translational Science<br>Metse, Alexandra; University of Newcastle, School of Psychology; University of the Sunshine Coast, School of Health and Behavioural Sciences<br>Kermode, Allan; Perron Institute for Neurological and Translational Science; Murdoch University, Centre for Molecular Medicine and Innovative Therapeutics, Health Futures Institute<br>Karahalios, Amalia; The University of Melbourne School of Population and Global Health, Centre for Epidemiology and Biostatistics<br>Marck, C; The University of Melbourne School of Population and Global Health, Disability and Health Unit |
| <b>Primary Subject Heading</b>: | Epidemiology                                                                                                                                                                                                                                                                                                                                                                                                                                                                                                                                                                                                                                                                                                                                                                                                                                                                                                                                                                                                                                             |
| Secondary Subject Heading:      | Neurology                                                                                                                                                                                                                                                                                                                                                                                                                                                                                                                                                                                                                                                                                                                                                                                                                                                                                                                                                                                                                                                |
| Keywords:                       | Multiple sclerosis < NEUROLOGY, MENTAL HEALTH, Depression & mood disorders < PSYCHIATRY, EPIDEMIOLOGY                                                                                                                                                                                                                                                                                                                                                                                                                                                                                                                                                                                                                                                                                                                                                                                                                                                                                                                                                    |
|                                 |                                                                                                                                                                                                                                                                                                                                                                                                                                                                                                                                                                                                                                                                                                                                                                                                                                                                                                                                                                                                                                                          |

SCHOLARONE™  
Manuscripts

1  
2  
3 1 **Title: Comparing the effectiveness, safety, and tolerability of interventions for depressive**  
4  
5 2 **symptoms in people with multiple sclerosis: a systematic review and network meta-**  
6  
7 3 **analysis protocol**  
8  
9

10  
11 4 Julia Lyons <sup>a</sup>, Stephanie Campese <sup>a</sup>, Yvonne C Learmonth <sup>b,c,d</sup>, Alexandra Metse <sup>e,f</sup>, Allan G.  
12  
13 5 Kermode <sup>c,d</sup>, Amalia Karahalios <sup>g\*</sup>, Claudia H Marck <sup>a\*</sup>  
14  
15

16  
17 6 \*Shared last author  
18

19 7 Full affiliation(s):  
20

21 8 <sup>a</sup> Disability and Health Unit, Melbourne School of Population and Global Health, University  
22 9 of Melbourne, Victoria, Australia  
23

24 10 <sup>b</sup> Discipline of Exercise Science, Murdoch University, Murdoch, Western Australia, Australia  
25

26 11 <sup>c</sup> Perron Institute for Neurological and Translational Science, Perth, Western Australia,  
27 12 Australia  
28

29 13 <sup>d</sup> Centre for Molecular Medicine and Innovative Therapeutics, Health Futures Institute,  
30 14 Murdoch University, Murdoch, Western Australia, Australia  
31

32 15 <sup>e</sup> School of Health and Behavioural Sciences, University of the Sunshine Coast, Sippy Downs,  
33 16 Queensland, Australia  
34

35 17 <sup>f</sup> School of Psychology, University of Newcastle, Callaghan, New South Wales, Australia  
36

37 18 <sup>g</sup> Centre for Epidemiology and Biostatistics, Melbourne School of Population and Global  
38 19 Health, University of Melbourne, Australia  
39

40  
41  
42 20  
43 21 Corresponding author:  
44

45 22 Dr Amalia Karahalios  
46

47 23 Melbourne School of Population and Global Health,  
48

49 24 University of Melbourne,  
50

51 25 Parkville 3010, Victoria, Australia  
52

53 26 [emily.karahalios@unimelb.edu.au](mailto:emily.karahalios@unimelb.edu.au)  
54

55 27 **Word count: 3565**  
56  
57  
58  
59  
60



## 28 **ABSTRACT**

### 29 **Background**

30 Comorbid depression is prevalent in people with multiple sclerosis (MS). Depression is  
31 commonly untreated or undertreated, thus, there is a need for effective and safe interventions  
32 and current guidelines recommend psychological and pharmaceutical interventions for people  
33 with MS. However, research suggests that other interventions, such as exercise, could also be  
34 effective. The comparative efficacy and safety of intervention modalities have not been  
35 quantified.

36  
37 We plan to conduct a systematic review and network meta-analysis to compare efficacy and  
38 safety of psychological, pharmaceutical, physical, and magnetic stimulation interventions for  
39 depression in people with MS.

### 40 **Methods and analysis:**

41 We will search EMBASE, Medline, Cochrane CENTRAL, APA PsycInfo, Web of Science,  
42 CINAHL and PEDro from inception to 31/12/2021. Search terms will stem from three  
43 concepts: MS, depression, and randomised controlled trials. Included studies will be  
44 randomised controlled trials, where participants are people with MS randomised to receive  
45 one of the aforementioned intervention types, and depression or depressive symptoms is the  
46 primary outcome, only outcome, or secondary outcome with an *a priori* power calculation.  
47 Screening, data extraction, and risk of bias assessment (using the Risk of Bias 2 tool) will be  
48 conducted independently by two reviewers. If possible, we will synthesise the evidence by  
49 fitting a frequentist network meta-analysis model with multivariate random effects, or a  
50 pairwise random-effects meta-analysis model. For each model, efficacy will be measured

1  
2  
3 51 using a standardised mean difference, and safety using an odds ratio. We plan to provide  
4  
5 52 summary measures including forest plots, a geometry of the network, surface under the  
6  
7  
8 53 cumulative ranking curve, and a league table, and perform subgroup analyses. Otherwise, a  
9  
10 54 narrative review will be provided.

11  
12 55 **Ethics and dissemination:**

13  
14  
15 56 Ethics is not required for a systematic review and network meta-analysis. Results will be  
16  
17 57 published in a peer reviewed journal.

18  
19 58 **Review registration:**

20  
21 59 PROSPERO registration CRD42020209803.  
22  
23  
24 60

25  
26 61 **STRENGTHS AND LIMITATIONS OF THIS STUDY:**

- 27  
28 62 • Advanced network meta-analysis methods together with sensitivity and subgroup analyses  
29  
30 63 will comprehensively quantify the comparative efficacy, safety, and tolerability of several  
31  
32 64 interventions for depression in people with MS.
- 33  
34 65 • This systematic review will use a detailed search strategy and pre-specified eligibility  
35  
36 66 criteria, with all steps of the review process conducted independently by two reviewers.
- 37  
38 67 • Eligibility criteria include randomised controlled trials which are limited to depression as the  
39  
40 68 primary outcome, only outcome, or secondary outcome with a power analysis.
- 41  
42 69 • To meet the transitivity assumption, trials that include participants with treatment  
43  
44 70 resistant/refractory depression will be excluded.

45  
46  
47 71 **KEYWORDS:** multiple sclerosis, depression or depressive symptoms, network meta-  
48  
49 72 analysis, systematic review.  
50  
51

52  
53  
54  
55 73 **ARTICLE TYPE:** protocol  
56  
57  
58  
59  
60

## 74 INTRODUCTION:

75 Multiple Sclerosis (MS) is a chronic, immune mediated and neurodegenerative disease  
76 characterised by the formation of destructive lesions predominantly involving myelinated  
77 axons within the central nervous system <sup>1</sup>. There are a broad range of symptoms attributed to  
78 the multifocal lesions distinctive of MS including depression and depressive symptoms, pain,  
79 fatigue, impaired gait, incontinence, impaired vision, and spasticity <sup>2</sup>. Depression can be  
80 particularly burdensome, and affects up to 50% of people with MS <sup>3</sup>. Depressive symptoms in  
81 people with MS are reported to impact adherence to disease modifying therapies <sup>4</sup>, and  
82 increase pain sensitivity <sup>2</sup>. Further, reduced participation in work and depressive symptoms  
83 are associated with poor health related quality of life <sup>5</sup> in people with MS. Major depressive  
84 disorder is the most commonly diagnosed depressive disorder <sup>6</sup>. It is defined as experiencing a  
85 minimum of five of the following symptoms within a two-week period: depressed mood or  
86 lack of pleasure, feelings of worthlessness/guilt, fatigue, appetite or weight changes,  
87 psychomotor agitation, diminished concentration, feelings of worthlessness/guilt, suicidality  
88 and sleep difficulties <sup>6</sup>. Depressive symptoms which do not meet the definition of major  
89 depressive disorder are even more prevalent in people with MS, and commonly require  
90 treatment <sup>7</sup>. Furthermore, people with MS who have moderate-to-severe depressive symptoms  
91 have been reportedly underdiagnosed and undertreated <sup>5,8</sup>. The aetiology of depression and  
92 depressive symptoms in people with MS is not yet fully understood <sup>9</sup> but due to the multitude  
93 of effects, safe and effective interventions are required.

94 Guidelines for treating depression in people with MS suggest that a combination of  
95 psychological and pharmaceutical interventions is the most effective therapy in reducing

1  
2  
3 96 levels of depressive symptoms<sup>10 11</sup>. Specifically, these guidelines recommend  
4  
5 97 pharmacotherapies such as antidepressants, psychological treatments such as cognitive  
6  
7 98 behavioural therapy, and, where applicable and safe, exercise-based interventions<sup>11</sup>.  
9  
10 99 However, some interventions, including third wave cognitive and behavioural (psychological)  
11  
12 100 interventions that emphasise the role of mindfulness<sup>12</sup> and specific types of exercise such as  
13  
14 101 Pilates<sup>13</sup>, have not been included in these guidelines. The American Association of  
15  
16 102 Neurology review to inform guidelines<sup>14</sup> noted the scarcity of trials to treat depression in  
17  
18 103 people with MS and therefore a lack of strong evidence. Following this review<sup>14</sup>, several  
19  
20 104 studies have sought to address the treatment of depressive symptoms in MS. Evidence from  
21  
22 105 systematic reviews reported that exercise<sup>15 16</sup> and mindfulness-based interventions<sup>17</sup> when  
23  
24 106 compared to waitlist/usual care have a moderate effect at reducing depressive symptoms in  
25  
26 107 people with MS. However, it is unclear how these interventions compare in terms of efficacy  
27  
28 108 and safety.

29  
30  
31  
32  
33  
34 109 Network meta-analysis enables the comparison of multiple interventions by simultaneously  
35  
36 110 combining direct and indirect evidence<sup>18</sup>. Synthesising the evidence in this manner will  
37  
38 111 enable a comprehensive understanding of how interventions compare (in terms of efficacy and  
39  
40 112 safety), which should greatly enhance evidence-based decision making for people with MS  
41  
42 113 and their clinicians on how best to manage depressive symptoms. The major assumption  
43  
44 114 underpinning network meta-analysis methods ensures that we can compare two interventions  
45  
46 115 via a third (common) intervention and is referred to as transitivity. Transitivity requires that  
47  
48 116 the trials included in the network meta-analysis are considered to be ‘jointly randomisable’,  
49  
50 117 that the common intervention (comparator) from the different trials is similar enough to be  
51  
52 118 combined, and that the characteristics associated with the effect of the intervention are similar

1  
2  
3 119 across the included trials<sup>19 20</sup>.  
4  
5

6  
7 120 This article outlines the protocol for a systematic review and network meta-analysis to  
8  
9 121 compare the effectiveness and safety of intervention modalities, or combination of modalities,  
10  
11 122 in reducing depressive symptoms in adults with MS. This review is the first stage of a larger  
12  
13 123 project that aims to provide guidance for public health researchers on the design and analysis  
14  
15 124 of systematic reviews with network meta-analysis and future trials in MS.  
16  
17  
18

## 19 20 125 **METHODS** 21 22

23  
24 126 This systematic review protocol is registered with The International Prospective Register of  
25  
26 127 Systematic Reviews (PROSPERO) (CRD42020209803) and adheres to the Preferred  
27  
28 128 Reporting Items for Systematic Reviews and Meta-Analyses extension for Network Meta-  
29  
30 129 Analysis (PRISMA NMA) statement <sup>21</sup>, see supplementary file 1 for checklist.  
31  
32  
33

## 34 130 **Patient and public involvement** 35 36 37

38 131 Neither patients nor the public were involved in the design, conduct, or reporting of the  
39  
40 132 research in this article.  
41  
42  
43

## 44 133 **Eligibility criteria** 45 46

### 47 134 **Participants** 48 49

50 135 Adults (aged 18 years or older) of any gender who have been diagnosed with any type of MS.  
51  
52  
53

### 54 136 **Interventions** 55 56 57 58 59 60

1  
2  
3 137 We will include interventions that aim to alleviate depressive symptoms in people with MS,  
4  
5 138 including:

6  
7  
8  
9 139 *Psychological interventions* delivered with the intention of treating depressive symptoms,  
10  
11 140 informed by psychological theories or principle(s) and a) implemented by a  
12  
13 141 psychiatrist/psychologist or other mental health clinician or b) manualized, with content  
14  
15 142 developed by a mental health clinician or researcher, e.g., online/app or web-based  
16  
17 143 intervention.

18  
19  
20  
21  
22 144 *Pharmaceutical interventions* that involve the use of medication or drugs for the intention of  
23  
24 145 treating depressive symptoms at a therapeutic dose according to the manufacturer guidelines  
25  
26 146 (if available).

27  
28  
29  
30  
31 147 *Physical interventions* including physiotherapy and physical activity (any bodily movement  
32  
33 148 that results in energy expenditure) including exercise, aimed at treating depressive symptoms.  
34  
35 149 Subtypes of physical activity will be included.

36  
37  
38  
39 150 *Electromagnetic stimulations* involve the use of targeted electromagnetic stimulation to  
40  
41 151 stimulate areas of the brain to reduce depressive symptoms. Subtypes include transcranial  
42  
43 152 magnetic stimulation, and transcranial direct current stimulation.

44  
45  
46  
47 153 Combinations of the above-mentioned intervention modalities will be included and will form  
48  
49 154 new categories. Any interventions that are specific to people with treatment resistant  
50  
51 155 depression/refractory depression will not be included (e.g., electroconvulsive therapy). These  
52  
53 156 treatments will be excluded because they will compromise the transitivity assumption (i.e.,  
54  
55  
56  
57  
58  
59  
60

1  
2  
3 157 that all interventions are considered to be ‘jointly randomisable’). Treatments for people with  
4  
5 158 treatment resistant depression would not be considered to meet this assumption because they  
6  
7  
8 159 are not considered first line treatments for people with MS<sup>18</sup>.  
9

10  
11 160 Grouping of interventions will depend on the eligible trials. The four broad categories will be  
12  
13  
14 161 split into smaller sub-categories, e.g., psychological interventions could have a sub-category  
15  
16 162 of mindfulness-based interventions, similarly pharmaceutical interventions could have a sub-  
17  
18 163 category of serotonin reuptake inhibitors.  
19

#### 20 21 22 164 Comparator 23

24  
25  
26 165 We will consider the following comparators: any intervention modality included in the above  
27  
28 166 list, placebo, wait-list control, treatment as usual, or no treatment. Classification of comparator  
29  
30  
31 167 groups will depend on the type of comparator used in the original randomised trial. Common  
32  
33 168 types of comparators can include, but are not limited to, placebo, wait-list control, treatment  
34  
35 169 as usual, and no treatment control. These comparator groups do not have similar methodology  
36  
37 170 and can influence participant outcome in altering ways. Therefore, for this protocol and  
38  
39  
40 171 subsequent systematic review and network meta-analysis, we will adopt the recommended  
41  
42 172 framework for classification of comparator groups<sup>22</sup>. The groups will be (1) minimal  
43  
44 173 treatment control, active control, or similar; (2) wait-list control, treatment as usual, or no  
45  
46 174 treatment; and (3) pill placebo.  
47  
48  
49

#### 50 51 175 Outcome 52

53  
54 176 We will include trials that specified that depressive symptoms were the primary (or only)  
55  
56  
57  
58  
59  
60

1  
2  
3 177 outcome, or as a secondary outcome where an *a-priori* power calculation was provided. The  
4  
5 178 severity of depressive symptoms must have been measured by a validated self-report  
6  
7  
8 179 questionnaire or by clinician interview. Although depression and depressive symptoms are  
9  
10 180 likely to be measured and defined differently across trials <sup>23</sup>, we have chosen to accept all  
11  
12 181 types of standardised measures or clinical interviews. To assess the acute efficacy of the  
13  
14  
15 182 intervention, depressive symptoms must be measured within two weeks of completion of the  
16  
17 183 intervention. We will also assess the long-term efficacy of the intervention using trials that  
18  
19 184 have measured depressive symptoms at approximately six months post-intervention (within 4-  
20  
21 185 8 months). To measure long term efficacy and safety of interventions for reducing depressive  
22  
23 186 symptoms we will also extract the relevant data that is measured 12 or more months post-  
24  
25  
26 187 intervention. Any trials that have measured just one of the aforementioned time points will  
27  
28 188 still be eligible for inclusion.

30  
31  
32 189 Safety and tolerability outcomes will include:

- 33  
34  
35  
36 190 - Frequency of serious adverse events (SAEs) defined as an untoward occurrence of a medical  
37  
38 191 event that is fatal, life-threatening, requires hospitalisation or prolonging of existing  
39  
40 192 hospitalisation and/or persistent disability <sup>24-27</sup>.
- 41  
42  
43 193 - Frequency of adverse events (AEs) defined as the occurrence of an undesirable event  
44  
45 194 occurring during the study duration even if the event was not considered to be related to the  
46  
47 195 intervention <sup>24-27</sup>.
- 48  
49  
50 196 - Tolerability of the intervention will be assessed as the number of participants who  
51  
52 197 discontinue the study and/or have reduced compliance due to SAE or AEs <sup>24 28</sup>.

53  
54  
55  
56 198 The events will be measured as dichotomous outcomes during the intervention period. We  
57  
58  
59



1  
2  
3 199 will consider combining the SAE's and AE's if they are rare events in the trials.  
4  
5

## 6 7 200 Types of Studies 8 9

10 201 We will include randomised controlled trials, including multi-arm randomised trials. Quasi-  
11  
12 202 randomised, cluster and cross-over trials will not be included.  
13  
14  
15

## 16 17 203 **Search strategy** 18 19

20 204 We will search the following seven databases: EMBASE, Medline, Cochrane CENTRAL,  
21  
22 205 APA PsycInfo, Web of Science, CINAHL and PEDro. Note that EMBASE, Medline,  
23  
24 206 Cochrane CENTRAL and APA PsycInfo will be searched through the Ovid platform. The  
25  
26 207 search strategy was developed in conjunction with a medical librarian at the University of  
27  
28 208 Melbourne, Australia, as well as a clinical physiotherapist (YL) who works with people with  
29  
30 209 MS, and a clinical psychologist (AM). The search terms relate to three main concepts of MS,  
31  
32 210 depression, and randomised controlled trials. Search strategies for all databases are listed in  
33  
34 211 supplementary file 2. All databases were searched from inception to the 11<sup>th</sup> of July 2020 and  
35  
36 212 the search will be updated to include articles published up to the 31<sup>st</sup> of December 2021. We  
37  
38 213 will also search the reference lists of relevant systematic reviews to identify any randomised  
39  
40 214 trials that might have been missed in the database search. Trials will be limited to those  
41  
42 215 published in English.  
43  
44  
45  
46  
47  
48  
49

## 50 216 **Study selection** 51 52

53 217 Results from the search strategy will be uploaded to Endnote <sup>29</sup> where duplicates will be  
54  
55 218 removed. The remaining citations will be uploaded into the software management system  
56  
57  
58  
59  
60

1  
2  
3 219 Covidence<sup>30</sup> where any additional duplicates will be removed. Covidence will then be used  
4  
5 220 for title and abstract screening and full text screening by at least two independent reviewers  
6  
7  
8 221 with any conflicts resolved by a third reviewer.  
9

## 10 11 222 **Data Extraction**

12  
13  
14  
15 223 Data will be extracted using a data extraction tool developed for this review using Excel  
16  
17 224 software by at least two independent reviewers, with conflicts resolved by a third reviewer. If  
18  
19 225 data were missing from the published article the corresponding author will be contacted. We  
20  
21 226 will not look at other sources of citations such as grey literature, clinical trial registries, or  
22  
23 227 protocol papers. The extracted data will relate to the following categories:  
24  
25

- 26  
27  
28 228 - Study characteristics: first author's last name, year of publication, year of baseline  
29  
30 229 recruitment, method of recruitment, method of randomisation, inclusion criteria (e.g., a  
31  
32 230 baseline level of depression cut off for inclusion into study).  
33  
34 231 - Sample demographics: sample size, number of participants randomised, baseline  
35  
36 232 characteristics such as diagnosis of MS, age (years), sex, years since diagnosis of MS, level of  
37  
38 233 disability, and disability tool.  
39  
40 234 - Intervention and comparator characteristics: type, frequency of intervention/treatment,  
41  
42 235 duration of intervention/treatment, and dose of intervention/treatment. We will use TIDieR for  
43  
44 236 clear reporting of the characteristics of the interventions and comparators<sup>31</sup>.  
45  
46 237 - Efficacy outcome data: type of outcome measurement scale, mean and standard deviation of  
47  
48 238 depressive symptom score at baseline, post-intervention, at six months post-intervention, and  
49  
50 239 at 12 months post-intervention (if available).  
51  
52 240 - Safety and tolerability data: type and number of SAEs and AEs, number of participants that  
53  
54  
55  
56  
57  
58  
59  
60

1  
2  
3 241 discontinue participation due to an SAE or AE or discontinue participation for other reasons  
4  
5 242 during the intervention. Safety and tolerability data will be extracted for each trial arm and  
6  
7 243 time point where available.

8  
9  
10 244 - Data relating to the risk of bias assessment: randomisation process, allocation concealment,  
11  
12 245 deviations from intended treatment, baseline characteristics differences, missing outcome  
13  
14 246 data, appropriateness of outcome measurement, potential influence in outcome assessment,  
15  
16 247 and selectively reporting results.  
17  
18

19 248

## 20 21 249 **Risk of bias assessment**

22  
23  
24  
25 250 We will use the RoB 2 to assess the risk of bias for each study that meets the eligibility criteria  
26  
27 251 <sup>32</sup>. This tool evaluates the risk of bias in five key domains: randomisation process, deviations  
28  
29 252 from intended interventions, missing outcome data, measurement of the outcome, and  
30  
31 253 selection of the reported result. The RoB 2 tool provides an overall assessment of the risk of  
32  
33 254 bias in the study using three categories: low risk, some concerns or high risk of bias. At least  
34  
35 255 two independent reviewers will assess the risk of bias in each study with any conflicts  
36  
37 256 between judgements resolved by a third reviewer. In this systematic review and network meta-  
38  
39 257 analysis there will be an inherent difference in the overall risk of bias between trials due to the  
40  
41 258 type of intervention. Blinding of the participants to the assigned intervention is difficult in  
42  
43 259 some study designs and interventions. For example, in a trial that randomised participants to  
44  
45 260 exercise and wait-list control, participants will be aware of the treatment arm that they were  
46  
47 261 allocated to. However, in a trial that randomised participants to an anti-depressant and  
48  
49 262 placebo, participants are unlikely to be aware which treatment they were allocated. As well,  
50  
51 263 blinding of the outcome assessors can also be difficult in these trials as depressive symptoms  
52  
53  
54  
55  
56  
57  
58  
59  
60

264 are typically measured using self-reported tools. Despite this inherent difference we have  
265 chosen not to deviate from the protocol of the RoB 2 tool or alter the tool in any way.

## 266 **Data synthesis**

### 267 Characteristics of the included trials

268 We will generate descriptive statistics for the sample populations to understand the  
269 demographics of the review participants across all eligible trials. These descriptive statistics  
270 will describe key clinical and methodological characteristics such as age, sex, type of MS, and  
271 type of intervention modality.

### 272 Outcome data

273 We will have two primary and two secondary outcomes.

#### 274 *Primary outcomes:*

- 275 (1) efficacy of the interventions (reduction of depressive symptoms) measured  
276 immediately post-intervention and quantified using standardised mean difference<sup>33</sup>, and
- 277 (2) safety of the interventions (SAEs, AEs and tolerability) measured immediately post-  
278 intervention and quantified using odds ratios.

#### 279 *Secondary outcomes:*

- 280 (1) efficacy of the interventions (reduction of depressive symptoms) measured  
281 immediately six months post-intervention (between four and eight months) and quantified

1  
2  
3 282 using standardised mean differences;  
4

5 283 (2) safety of the interventions (SAEs, AEs and tolerability) measured six months post  
6

7  
8 284 intervention (between four and eight months) and quantified using odds ratios;  
9

10 285 (3) efficacy of intervention (reduction of depressive symptoms) measured 12 months post-  
11

12 286 intervention (12 months or longer) and quantified using standardised mean differences;  
13

14 287 (4) safety of interventions (SAEs, AEs and tolerability) measured 12 months post-  
15

16 288 intervention (12 months or longer) and quantified using odds ratios.  
17  
18

19 289

20  
21 290 Pairwise Meta-analysis  
22  
23

24  
25 291 First, we will pool the data that compare the same major category of intervention modality  
26

27 292 (i.e., psychological, pharmaceutical, physical, electromagnetic stimulation therapies or  
28

29 293 combination) to each other or to placebo/usual care by fitting a random effects pairwise meta-  
30

31 294 analysis model and using the restricted maximum likelihood estimator to estimate the between  
32

33 295 study heterogeneity. The random effects model will assume that the underlying intervention  
34

35 296 effects across the trials are similar but not identical allowing an estimation of the  
36

37 297 heterogeneity in the model<sup>34</sup>. This will be performed for both the efficacy outcome, using the  
38

39 298 standardised mean difference, and the safety outcome, using odds ratios. Effect sizes will be  
40

41 299 presented with their corresponding 95% confidence intervals. Heterogeneity will be estimated  
42

43 300 using the  $I^2$  and  $\tau^2$  statistics<sup>35</sup>.  
44  
45

46  
47  
48  
49 301 Network meta-analysis model  
50

51  
52  
53 302 We will fit a multivariate meta-analysis contrast-based model within a frequentist framework  
54

55 303 using the network package in Stata<sup>36</sup>. We will assume common heterogeneity across the  
56  
57  
58  
59  
60

1  
2  
3 304 trials.  
4  
5

6  
7 305 Geometry of the network  
8  
9

10 306 We will generate a network diagram, separately for efficacy and safety, to visualise the  
11  
12 307 network of intervention modalities. The nodes (or intervention modalities) will represent the  
13  
14 308 total number of trials in each treatment group; the larger the size of the node the larger the  
15  
16 309 sample size. The edges of the lines connecting each node will represent the precision of the  
17  
18 310 evidence, i.e., the thicker the line the more precise evidence. Figure 1 shows an example of the  
19  
20 311 possible network structure with the major intervention modalities included.  
21  
22  
23  
24

25  
26 312 **<insert figure 1 here>**  
27  
28  
29

30 313 Assessment of transitivity in the network  
31  
32

33  
34 314 The transitivity assumption, which underpins the method of a network meta-analysis, requires  
35  
36 315 that the characteristics associated with the effect of the intervention are similar across the  
37  
38 316 included trials<sup>18</sup>. Participant characteristics (for example, age, sex, type of MS, level of  
39  
40 317 disability, and years since diagnosis of MS) could indicate violation of the transitivity  
41  
42 318 assumption<sup>18</sup>. To assess this requirement of the transitivity assumption the characteristics of  
43  
44 319 the participants recruited into each trial will be summarised and compared. If this requirement  
45  
46 320 of the transitivity assumption is thought to be violated, we will undertake narrative synthesis  
47  
48 321 of the data (described below) and possibly pair wise meta-analyses (described above). If we  
49  
50 322 find no reason to suggest that violation of the transitivity assumption, we will synthesise the  
51  
52 323 available evidence using network meta-analysis techniques. We will fit a random effects  
53  
54  
55  
56  
57  
58  
59  
60

1  
2  
3 324 network meta-analysis model in a frequentist framework and assume a common heterogeneity  
4  
5 325 parameter across the eligible trials. The random effects model assumes that the variation  
6  
7 326 between trials could be a result of heterogeneity and not from sampling variation<sup>18 36</sup>.

## 11 327 Summary Statistics and presentation of results

15 328 We will present forest plots that will include pooled estimates from the direct and mixed  
16  
17 329 intervention effects and league tables with the summary standardised mean differences or  
18  
19 330 odds ratios for all pairwise comparisons<sup>37 38</sup>. We will use a predictive interval plot to show the  
20  
21 331 grouped intervention modality standardised mean differences or odds ratios in a future trial<sup>37</sup>.  
22  
23 332 We will then obtain a hierarchy of the intervention modalities using the surface under the  
24  
25 333 cumulative ranking curve (SUCRA). SUCRA uses probabilities to determine which  
26  
27 334 intervention modality is most likely to be the most effective at reducing depressive symptoms  
28  
29 335 in people with MS. A probability of 1 (or 100%) is indicative of the stated intervention  
30  
31 336 modality being the most effective intervention modality, conversely, a probability of 0 (or 0%)  
32  
33 337 is indicative of the stated intervention modality being the least effective<sup>38</sup>.

## 40 338 Assessment of inconsistency

43 339 Consistency is a measure of the agreement between direct evidence and indirect evidence. If  
44  
45 340 inconsistency occurs in a network it may suggest that there is significant heterogeneity and  
46  
47 341 that the transitivity assumption could be violated<sup>18 34</sup>. Using the network meta-analysis  
48  
49 342 package in Stata<sup>36</sup> a consistency and an inconsistency model can be separately fitted to assess  
50  
51 343 whether the direct and indirect evidence are in agreement for each outcome. These models can  
52  
53 344 provide information to help ascertain if the direct and indirect evidence are in statistical

1  
2  
3 345 agreement<sup>39</sup>. If there is evidence of inconsistency in the network, we will use the side-  
4  
5 346 splitting approach to identify if there is a specific modality of interventions that contribute to  
6  
7 347 inconsistency in the network<sup>36,39</sup>. This will enable us to further investigate the possible  
8  
9 348 sources of inconsistency<sup>40</sup>.

### 14 349 Subgroup analysis

17  
18 350 We will conduct separate subgroup analyses for the efficacy and the safety outcome if there is  
19  
20 351 substantial heterogeneity or inconsistency and the data allows this.

23  
24 352 For the efficacy outcome, we will assess the following subgroups:

- 27 353 – Year of baseline recruitment; to determine if treatments have become more  
28  
29 354 effective over time.
- 31 355 – Severity of depression at baseline (i.e., trials that recruited based on level of  
32  
33 356 depression vs trials that did not); to determine whether interventions are efficacious  
34  
35 357 when a level of depressive symptoms is present.
- 38 358 – Comparison of self-reported outcome measures vs clinical assessment; to  
39  
40 359 determine if there is a difference in the efficacy of the treatment due to the  
41  
42 360 measurement of the outcome.
- 45 361 – Level of disability at enrolment (e.g., as measured by Patient determined disease  
46  
47 362 steps, Expanded Disability Disease Scale: categorised in mild, moderate or severe  
48  
49 363 disability); to determine if level of disability is associated with the efficacy of the  
50  
51 364 intervention.
- 54 365 – Whether the intervention was conducted in a dose according to guidelines that



1  
2  
3 366 exist for that type of interventions (e.g., exercise guidelines for people with MS);  
4  
5 367 to determine if a minimum dose is associated with the efficacy of the intervention.  
6  
7

8 368 For the safety and tolerability outcome we will undertake subgroup analyses by year of  
9  
10 369 baseline recruitment and level of disability at enrolment.  
11

12 370

13  
14 371 Assessment of small study effects  
15

16  
17  
18 372 We will use the comparison-adjusted<sup>37</sup> and contour-enhanced<sup>41</sup> funnel plots to investigate  
19  
20 373 whether results in imprecise trials differ from those in more precise trials. Network meta-  
21  
22 374 regression models will be used to investigate associations between study sample size and  
23  
24 375 effect size<sup>42</sup>.  
25  
26  
27  
28

29 376 Narrative synthesis  
30

31  
32  
33 377 If we are unable to conduct a NMA or pairwise meta-analyses we plan to conduct a narrative  
34  
35 378 synthesis to assess which interventions reported the outcomes of interest and if there were any  
36  
37 379 patterns relating to specific interventions, or gaps in the literature.  
38  
39  
40

## 41 380 **ETHICS AND DISSEMINATION**

42  
43  
44

45 381 Ethical approval is not needed for a systematic review and network meta-analysis as we will  
46  
47 382 use aggregated data from previously published randomised trials. The dissemination of the  
48  
49 383 results of the systematic review and network meta-analysis will include publishing in a peer  
50  
51 384 reviewed journals to apprise MS researchers and clinicians, and people with MS. The results  
52  
53 385 of the systematic review and network meta-analysis have the potential to inform future  
54  
55  
56  
57  
58  
59  
60

1  
2  
3 386 treatment guidelines for depression in people with MS. Further, the review may highlight any  
4  
5 387 gaps in the literature and provide recommendations for the conduct and reporting of future  
6  
7  
8 388 randomised trials.  
9

## 10 11 389 **AUTHORS CONTRIBUTIONS**

12  
13  
14  
15 390 AK and CHM conceived the study. AK, CHM, JL, SC, YL, AGK and AM contributed to the  
16  
17 391 study design. JL drafted the manuscript and AK, CHM, SC, YL edited the manuscript. All  
18  
19  
20 392 authors read and approved the final manuscript.  
21  
22

## 23 24 393 **FUNDING**

25  
26 394 CHM was funded by an Early Career Fellowship from the National Health and Medical  
27  
28 395 Research Council (ID: 1120014) and a Fellowship from Multiple Sclerosis Research Australia  
29  
30  
31 396 (ID 20-216).  
32

## 33 397 **CONFLICT OF INTEREST**

34  
35  
36  
37 398 The authors declare no conflict of interest.  
38  
39

## 40 41 399 **REFERENCES**

- 42  
43  
44 400 1. Hunter SF. Overview and diagnosis of multiple sclerosis. *Am J Manag Care* 2016;22(6  
45 401 Suppl):s141-50. [published Online First: 2016/06/30]  
46 402 2. Feinstein A, Magalhaes S, Richard JF, et al. The link between multiple sclerosis and  
47 403 depression. *Nat Rev Neurol* 2014;10(9):507-17. doi: 10.1038/nrneurol.2014.139  
48 404 [published Online First: 2014/08/13]  
49 405 3. Arnett PA, Barwick FH, Beeney JE. Depression in multiple sclerosis: review and  
50 406 theoretical proposal. *J Int Neuropsychol Soc* 2008;14(5):691-724. doi:  
51 407 10.1017/s1355617708081174 [published Online First: 2008/09/04]  
52 408 4. Tarrants M, Oleen-Burkey M, Castelli-Haley J, et al. The impact of comorbid depression on  
53 409 adherence to therapy for multiple sclerosis. *Mult Scler Int* 2011;2011:271321. doi:  
54 410 10.1155/2011/271321.  
55  
56  
57  
58  
59  
60

- 1  
2  
3 411 5. Ploughman M, Wallack EM, Chatterjee T, et al. Under-treated depression negatively  
4 412 impacts lifestyle behaviors, participation and health-related quality of life among older  
5 413 people with multiple sclerosis. *Mult Scler Relat Disord* 2020;40:101919. doi:  
6 414 10.1016/j.msard.2019.101919.
- 7  
8 415 6. American Psychiatric Association. Diagnostic and Statistical Manual of Mental Disorders  
9 416 (DSM-5®). USA: American Psychiatric Association Publishing 2019.
- 10 417 7. Boeschoten RE, Braamse AMJ, Beekman ATF, et al. Prevalence of depression and anxiety  
11 418 in Multiple Sclerosis: A systematic review and meta-analysis. *J Neurol Sci*  
12 419 2017;372:331-41. doi: 10.1016/j.jns.2016.11.067.
- 13 420 8. Grech LB, Haines S, Marck CH, et al. Untreated and under-treated depressive symptoms in  
14 421 people with multiple sclerosis in an Australian context: A secondary analysis.  
15 422 *Collegian* 2020 doi: <https://doi.org/10.1016/j.colegn.2020.02.010>.
- 16 423 9. Feinstein A. Multiple sclerosis and depression. *Mult Scler* 2011;17(11):1276-81. doi:  
17 424 10.1177/1352458511417835.
- 18 425 10. Goldman Consensus G. The Goldman Consensus statement on depression in multiple  
19 426 sclerosis. *Mult Scler* 2005;11(3):328-37. doi: 10.1191/1352458505ms1162oa.
- 20 427 11. Toward Optimized Practice (TOP) MS in Depression Working Group. Identification and  
21 428 management of depression in multiple sclerosis: Clinical practice guideline. 2015;  
22 429 2020(15 May 2020). <http://www.topalbertadoctors.org>.
- 23 430 12. Kolahkaj B, Zargar F. Effect of Mindfulness-Based Stress Reduction on Anxiety,  
24 431 Depression and Stress in Women With Multiple Sclerosis. *Nurs* 2015;4(4):e29655.  
25 432 doi: <https://dx.doi.org/10.17795/nmsjournal29655>.
- 26 433 13. Fleming KM, Coote SB, Herring MP. The feasibility of Pilates to improve symptoms of  
27 434 anxiety, depression, and fatigue among people with Multiple Sclerosis: An eight-week  
28 435 randomized controlled pilot trial. *Psychology of Sport and Exercise* 2019;45:9. doi:  
29 436 10.1016/j.psychsport.2019.101573.
- 30 437 14. Minden SL, Feinstein A, Kalb RC, et al. Evidence-based guideline: assessment and  
31 438 management of psychiatric disorders in individuals with MS: report of the Guideline  
32 439 Development Subcommittee of the American Academy of Neurology. *Neurology*  
33 440 2014;82(2):174-81. doi: 10.1212/wnl.000000000000013.
- 34 441 15. Dalgas U, Stenager E, Sloth M, et al. The effect of exercise on depressive symptoms in  
35 442 multiple sclerosis based on a meta-analysis and critical review of the literature. *Eur J*  
36 443 *Neurol* 2015;22(3):443-e34. doi: 10.1111/ene.12576.
- 37 444 16. Ensari I, Motl RW, Pilutti LA. Exercise training improves depressive symptoms in people  
38 445 with multiple sclerosis: results of a meta-analysis. *J Psychosom Res* 2014;76(6):465-  
39 446 71. doi: 10.1016/j.jpsychores.2014.03.014.
- 40 447 17. Simpson R, Simpson S, Ramparsad N, et al. Mindfulness-based interventions for mental  
41 448 well-being among people with multiple sclerosis: a systematic review and meta-  
42 449 analysis of randomised controlled trials. *J Neurol Neurosurg Psychiatry*  
43 450 2019;90(9):1051-58. doi: 10.1136/jnnp-2018-320165.
- 44 451 18. Rouse B, Chaimani A, Li T. Network meta-analysis: an introduction for clinicians. *Intern*  
45 452 *Emerg Med* 2017;12(1):103-11. doi: 10.1007/s11739-016-1583-7.
- 46 453 19. Salanti G. Indirect and mixed-treatment comparison, network, or multiple-treatments  
47 454 meta-analysis: many names, many benefits, many concerns for the next generation  
48 455 evidence synthesis tool. *Res Synth Methods* 2012;3(2):80-97. doi: 10.1002/jrsm.1037.

- 1  
2  
3 456 20. Higgins JPT, Thomas J, Chandler J, Cumpston M, Li T, Page MJ, Welch VA (editors).  
4 457 Cochrane Handbook for Systematic Reviews of Interventions version 6.3 (updated  
5 458 February 2022). Cochrane, 2022. Available from  
6 459 [www.training.cochrane.org/handbook](http://www.training.cochrane.org/handbook).  
7  
8 460 21. Hutton B, Salanti G, Caldwell DM, et al. The PRISMA extension statement for reporting  
9 461 of systematic reviews incorporating network meta-analyses of health care  
10 462 interventions: checklist and explanations. *Ann Intern Med* 2015;162(11):777-84. doi:  
11 463 10.7326/M14-2385.  
12 464 22. Gold SM, Enck P, Hasselmann H, et al. Control conditions for randomised trials of  
13 465 behavioural interventions in psychiatry: a decision framework. *The Lancet Psychiatry*  
14 466 2017;4(9):725-32. doi: [https://doi.org/10.1016/S2215-0366\(17\)30153-0](https://doi.org/10.1016/S2215-0366(17)30153-0).  
15 467 23. Patten SB. Current perspectives on co-morbid depression and multiple sclerosis. *Expert*  
16 468 *Review of Neurotherapeutics* 2020;20(8):867-74. doi:  
17 469 10.1080/14737175.2020.1806062  
18 470 24. Ioannidis JP, Evans SJ, Gøtzsche PC, et al. Better reporting of harms in randomized trials:  
19 471 an extension of the CONSORT statement. *Ann Intern Med* 2004;141(10):781-8. doi:  
20 472 10.7326/0003-4819-141-10-200411160-00009.  
21 473 25. Edwards IR, Aronson JK. Adverse drug reactions: definitions, diagnosis, and  
22 474 management. *Lancet* 2000;356(9237):1255-9. doi: 10.1016/s0140-6736(00)02799-9.  
23 475 26. Duggan C, Parry G, McMurrin M, et al. The recording of adverse events from  
24 476 psychological treatments in clinical trials: evidence from a review of NIHR-funded  
25 477 trials. *Trials* 2014;15:335. doi: 10.1186/1745-6215-15-335.  
26 478 27. Ory M, Resnick B, Jordan PJ, et al. Screening, safety, and adverse events in physical  
27 479 activity interventions: collaborative experiences from the behavior change consortium.  
28 480 *Ann Behav Med* 2005;29 Suppl:20-8. doi: 10.1207/s15324796abm2902s\_5.  
29 481 28. Cipriani A, Zhou X, Del Giovane C, et al. Comparative efficacy and tolerability of  
30 482 antidepressants for major depressive disorder in children and adolescents: a network  
31 483 meta-analysis. *The Lancet* 2016;388(10047):881-90. doi:  
32 484 [https://doi.org/10.1016/S0140-6736\(16\)30385-3](https://doi.org/10.1016/S0140-6736(16)30385-3).  
33 485 29. The EndNote Team (2013). EndNote. Philadelphia, PA, Clarivate Analytics.  
34 486 30. Covidence systematic review software, Veritas Health Innovation, Melbourne, Australia.  
35 487 Available at [www.covidence.org](http://www.covidence.org).  
36 488 31. Hoffmann TC, Oxman AD, Ioannidis JP, et al. Enhancing the usability of systematic  
37 489 reviews by improving the consideration and description of interventions. *BMJ*  
38 490 2017;358:j2998. doi: 10.1136/bmj.j2998.  
39 491 32. Sterne JAC SJ, Page MJ, Elbers RG, Blencowe NS, Boutron I, Cates CJ, Cheng H-Y,  
40 492 Corbett MS, Eldridge SM, Hernán MA, Hopewell S, Hróbjartsson A, Junqueira DR,  
41 493 Jüni P, Kirkham JJ, Lasserson T, Li T, McAleenan A, Reeves BC, Shepperd S, Shrier  
42 494 I, Stewart LA, Tilling K, White IR, Whiting PF, Higgins JPT. RoB 2: a revised tool for  
43 495 assessing risk of bias in randomised trials. *BMJ* 2019(366):14898.  
44 496 33. Higgins JP, Li T, Deeks JJ. Chapter 6: Choosing effect measures and computing estimates  
45 497 of effect. In: Higgins JPT, Thomas J, Chandler J, Cumpston M, Li T, Page MJ, Welch  
46 498 VA (editors). Cochrane Handbook for Systematic Reviews of Interventions version 6.0  
47 499 Cochrane, 2019.

- 1  
2  
3 500 34. Chaimani A, Caldwell DM, Li T, et al. Additional considerations are required when  
4 501 preparing a protocol for a systematic review with multiple interventions. *J Clin*  
5 502 *Epidemiol* 2017;83:65-74. doi: 10.1016/j.jclinepi.2016.11.015.  
6  
7 503 35. Higgins JPT, Thompson SG, Deeks JJ, et al. Measuring inconsistency in meta-analyses.  
8 504 *BMJ* 2003;327(7414):557-60. doi: 10.1136/bmj.327.7414.557.  
9 505 36. White IR. Network meta-analysis. *Stata Journal* 2015;15(4):951-85.  
10 506 37. Chaimani A, Higgins JP, Mavridis D, et al. Graphical tools for network meta-analysis in  
11 507 STATA. *PLoS One* 2013;8(10):e76654. doi: 10.1371/journal.pone.0076654.  
12 508 38. Salanti G, Ades AE, Ioannidis JP. Graphical methods and numerical summaries for  
13 509 presenting results from multiple-treatment meta-analysis: an overview and tutorial. *J*  
14 510 *Clin Epidemiol* 2011;64(2):163-71. doi: 10.1016/j.jclinepi.2010.03.016.  
15 511 39. White IR, Barrett JK, Jackson D, et al. Consistency and inconsistency in network meta-  
16 512 analysis: model estimation using multivariate meta-regression. *Res Synth Methods*  
17 513 2012;3(2):111-25. doi: 10.1002/jrsm.1045.  
18 514 40. Dias S, Welton NJ, Caldwell DM, et al. Checking consistency in mixed treatment  
19 515 comparison meta-analysis. *Stat Med* 2010;29(7-8):932-44. doi: 10.1002/sim.3767.  
20 516 41. Peters JL, Sutton AJ, Jones DR, et al. Contour-enhanced meta-analysis funnel plots help  
21 517 distinguish publication bias from other causes of asymmetry. *J Clin Epidemiol*  
22 518 2008;61(10):991-6. doi: 10.1016/j.jclinepi.2007.11.010.  
23 519 42. Chaimani A, Salanti G. Using network meta-analysis to evaluate the existence of small-  
24 520 study effects in a network of interventions. *Res Synth Methods* 2012;3(2):161-76. doi:  
25 521 10.1002/jrsm.57.  
26  
27  
28  
29

30 522

31  
32  
33 523  
34  
35  
36  
37

38 524 **FIGURE LEGEND:**

39  
40  
41 525 Figure 1: The possible network structure for the major categories of interventions. Comparator  
42 526 group(s) may be split into multiple nodes as outlined in the comparator group section.  
43  
44  
45  
46  
47

48 527  
49  
50  
51  
52  
53  
54  
55  
56  
57  
58  
59  
60

1  
2  
3  
4  
5  
6  
7  
8  
9  
10  
11  
12  
13  
14  
15  
16  
17  
18  
19  
20  
21  
22  
23  
24  
25  
26  
27  
28  
29  
30  
31  
32  
33  
34  
35  
36  
37  
38  
39  
40  
41  
42  
43  
44  
45  
46  
47  
48  
49  
50  
51  
52  
53  
54  
55  
56  
57  
58  
59  
60

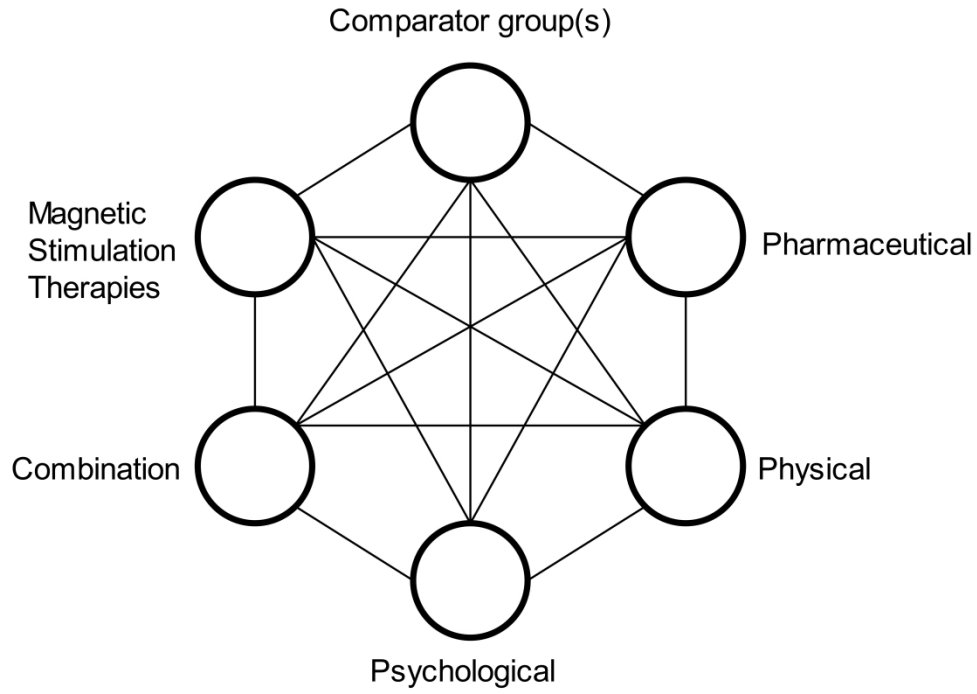

Figure 1: The possible network structure for the major categories of interventions. Comparator group(s) may be split into multiple nodes as outlined in the comparator group section.

2053x1443mm (72 x 72 DPI)

1  
2  
3  
4  
5  
6  
7  
8

## SUPPLEMENTARY FILE 1:

9  
10  
11  
12  
13  
14  
15

**Table 1: PRISMA-NMA guidelines checklist.**

16  
17  
18  
19  
20  
21  
22  
23  
24  
25  
26  
27  
28  
29  
30  
31  
32  
33

PRISMA NMA Checklist of Items to Include When Reporting A Systematic Review Involving a Network Meta-analysis

| Section/Topic             | Item # | Checklist Item                                                                                                                                                                                                                                                                                                                                                                                                                                                                                                                                                                                                                                                                                                                                                                          | Reported on Page # |
|---------------------------|--------|-----------------------------------------------------------------------------------------------------------------------------------------------------------------------------------------------------------------------------------------------------------------------------------------------------------------------------------------------------------------------------------------------------------------------------------------------------------------------------------------------------------------------------------------------------------------------------------------------------------------------------------------------------------------------------------------------------------------------------------------------------------------------------------------|--------------------|
| <b>TITLE</b>              |        |                                                                                                                                                                                                                                                                                                                                                                                                                                                                                                                                                                                                                                                                                                                                                                                         |                    |
| Title                     | 1      | Identify the report as a systematic review <i>incorporating a network meta-analysis (or related form of meta-analysis)</i> .                                                                                                                                                                                                                                                                                                                                                                                                                                                                                                                                                                                                                                                            | 1                  |
| <b>ABSTRACT</b>           |        |                                                                                                                                                                                                                                                                                                                                                                                                                                                                                                                                                                                                                                                                                                                                                                                         |                    |
| Structured summary        | 2      | Provide a structured summary including, as applicable:<br><b>Background:</b> main objectives<br><b>Methods:</b> data sources; study eligibility criteria, participants, and interventions; study appraisal; and <i>synthesis methods, such as network meta-analysis</i> .<br><b>Results:</b> number of studies and participants identified; summary estimates with corresponding confidence/credible intervals; <i>treatment rankings may also be discussed. Authors may choose to summarize pairwise comparisons against a chosen treatment included in their analyses for brevity.</i><br><b>Discussion/Conclusions:</b> limitations; conclusions and implications of findings.<br><b>Other:</b> primary source of funding; systematic review registration number with registry name. | 2                  |
| <b>INTRODUCTION</b>       |        |                                                                                                                                                                                                                                                                                                                                                                                                                                                                                                                                                                                                                                                                                                                                                                                         |                    |
| Rationale                 | 3      | Describe the rationale for the review in the context of what is already known, <i>including mention of why a network meta-analysis has been conducted</i> .                                                                                                                                                                                                                                                                                                                                                                                                                                                                                                                                                                                                                             | 4                  |
| Objectives                | 4      | Provide an explicit statement of questions being addressed, with reference to participants, interventions, comparisons, outcomes, and study design (PICOS).                                                                                                                                                                                                                                                                                                                                                                                                                                                                                                                                                                                                                             | 6                  |
| <b>METHODS</b>            |        |                                                                                                                                                                                                                                                                                                                                                                                                                                                                                                                                                                                                                                                                                                                                                                                         |                    |
| Protocol and registration | 5      | Indicate whether a review protocol exists and if and where it can be accessed (e.g., Web address); and, if available, provide registration information, including registration number.                                                                                                                                                                                                                                                                                                                                                                                                                                                                                                                                                                                                  | 6                  |
| Eligibility criteria      | 6      | Specify study characteristics (e.g., PICOS, length of follow-up) and report characteristics (e.g., years considered, language, publication status) used as criteria for eligibility, giving rationale. <i>Clearly describe eligible treatments included in the treatment network, and note whether any have been clustered or merged into the same node (with justification)</i> .                                                                                                                                                                                                                                                                                                                                                                                                      | 6-10               |
| Information sources       | 7      | Describe all information sources (e.g., databases with dates of coverage, contact with study authors to identify additional studies) in the search and date last searched.                                                                                                                                                                                                                                                                                                                                                                                                                                                                                                                                                                                                              | 9                  |
| Search                    | 8      | Present full electronic search strategy for at least one database,<br>For peer review only - <a href="http://bmjopen.bmj.com/site/about/guidelines.xhtml">http://bmjopen.bmj.com/site/about/guidelines.xhtml</a>                                                                                                                                                                                                                                                                                                                                                                                                                                                                                                                                                                        | Supplementary file |

58  
59  
60



|    |                                        |           |                                                                                                                                                                                                                                                                                                                                                                                                                                                   |       |
|----|----------------------------------------|-----------|---------------------------------------------------------------------------------------------------------------------------------------------------------------------------------------------------------------------------------------------------------------------------------------------------------------------------------------------------------------------------------------------------------------------------------------------------|-------|
| 1  |                                        |           | including any limits used, such that it could be repeated.                                                                                                                                                                                                                                                                                                                                                                                        |       |
| 2  | Study selection                        | 9         | State the process for selecting studies (i.e., screening, eligibility, included in systematic review, and, if applicable, included in the meta-analysis).                                                                                                                                                                                                                                                                                         | 10-11 |
| 3  |                                        |           |                                                                                                                                                                                                                                                                                                                                                                                                                                                   |       |
| 4  |                                        |           |                                                                                                                                                                                                                                                                                                                                                                                                                                                   |       |
| 5  |                                        |           |                                                                                                                                                                                                                                                                                                                                                                                                                                                   |       |
| 6  |                                        |           |                                                                                                                                                                                                                                                                                                                                                                                                                                                   |       |
| 7  | Data collection process                | 10        | Describe method of data extraction from reports (e.g., piloted forms, independently, in duplicate) and any processes for obtaining and confirming data from investigators.                                                                                                                                                                                                                                                                        | 11-12 |
| 8  |                                        |           |                                                                                                                                                                                                                                                                                                                                                                                                                                                   |       |
| 9  |                                        |           |                                                                                                                                                                                                                                                                                                                                                                                                                                                   |       |
| 10 | Data items                             | 11        | List and define all variables for which data were sought (e.g., PICOS, funding sources) and any assumptions and simplifications made.                                                                                                                                                                                                                                                                                                             | 11-12 |
| 11 |                                        |           |                                                                                                                                                                                                                                                                                                                                                                                                                                                   |       |
| 12 |                                        |           |                                                                                                                                                                                                                                                                                                                                                                                                                                                   |       |
| 13 | <b>Geometry of the network</b>         | <b>S1</b> | Describe methods used to explore the geometry of the treatment network under study and potential biases related to it. This should include how the evidence base has been graphically summarized for presentation, and what characteristics were compiled and used to describe the evidence base to readers.                                                                                                                                      | 15    |
| 14 |                                        |           |                                                                                                                                                                                                                                                                                                                                                                                                                                                   |       |
| 15 |                                        |           |                                                                                                                                                                                                                                                                                                                                                                                                                                                   |       |
| 16 |                                        |           |                                                                                                                                                                                                                                                                                                                                                                                                                                                   |       |
| 17 |                                        |           |                                                                                                                                                                                                                                                                                                                                                                                                                                                   |       |
| 18 |                                        |           |                                                                                                                                                                                                                                                                                                                                                                                                                                                   |       |
| 19 |                                        |           |                                                                                                                                                                                                                                                                                                                                                                                                                                                   |       |
| 20 | Risk of bias within individual studies | 12        | Describe methods used for assessing risk of bias of individual studies (including specification of whether this was done at the study or outcome level), and how this information is to be used in any data synthesis.                                                                                                                                                                                                                            | 12-13 |
| 21 |                                        |           |                                                                                                                                                                                                                                                                                                                                                                                                                                                   |       |
| 22 |                                        |           |                                                                                                                                                                                                                                                                                                                                                                                                                                                   |       |
| 23 |                                        |           |                                                                                                                                                                                                                                                                                                                                                                                                                                                   |       |
| 24 |                                        |           |                                                                                                                                                                                                                                                                                                                                                                                                                                                   |       |
| 25 | Summary measures                       | 13        | State the principal summary measures (e.g., risk ratio, difference in means). <i>Also describe the use of additional summary measures assessed, such as treatment rankings and surface under the cumulative ranking curve (SUCRA) values, as well as modified approaches used to present summary findings from meta-analyses.</i>                                                                                                                 | 16    |
| 26 |                                        |           |                                                                                                                                                                                                                                                                                                                                                                                                                                                   |       |
| 27 |                                        |           |                                                                                                                                                                                                                                                                                                                                                                                                                                                   |       |
| 28 |                                        |           |                                                                                                                                                                                                                                                                                                                                                                                                                                                   |       |
| 29 |                                        |           |                                                                                                                                                                                                                                                                                                                                                                                                                                                   |       |
| 30 |                                        |           |                                                                                                                                                                                                                                                                                                                                                                                                                                                   |       |
| 31 | Planned methods of analysis            | 14        | Describe the methods of handling data and combining results of studies for each network meta-analysis. This should include, but not be limited to: <ul style="list-style-type: none"> <li>• <i>Handling of multi-arm trials;</i></li> <li>• <i>Selection of variance structure;</i></li> <li>• <i>Selection of prior distributions in Bayesian analyses; and</i></li> <li>• <i>Assessment of model fit.</i></li> </ul>                            | 14-18 |
| 32 |                                        |           |                                                                                                                                                                                                                                                                                                                                                                                                                                                   |       |
| 33 |                                        |           |                                                                                                                                                                                                                                                                                                                                                                                                                                                   |       |
| 34 |                                        |           |                                                                                                                                                                                                                                                                                                                                                                                                                                                   |       |
| 35 |                                        |           |                                                                                                                                                                                                                                                                                                                                                                                                                                                   |       |
| 36 |                                        |           |                                                                                                                                                                                                                                                                                                                                                                                                                                                   |       |
| 37 |                                        |           |                                                                                                                                                                                                                                                                                                                                                                                                                                                   |       |
| 38 |                                        |           |                                                                                                                                                                                                                                                                                                                                                                                                                                                   |       |
| 39 |                                        |           |                                                                                                                                                                                                                                                                                                                                                                                                                                                   |       |
| 40 | <b>Assessment of Inconsistency</b>     | <b>S2</b> | Describe the statistical methods used to evaluate the agreement of direct and indirect evidence in the treatment network(s) studied. Describe efforts taken to address its presence when found.                                                                                                                                                                                                                                                   | 15-16 |
| 41 |                                        |           |                                                                                                                                                                                                                                                                                                                                                                                                                                                   |       |
| 42 |                                        |           |                                                                                                                                                                                                                                                                                                                                                                                                                                                   |       |
| 43 |                                        |           |                                                                                                                                                                                                                                                                                                                                                                                                                                                   |       |
| 44 | Risk of bias across studies            | 15        | Specify any assessment of risk of bias that may affect the cumulative evidence (e.g., publication bias, selective reporting within studies).                                                                                                                                                                                                                                                                                                      | 18    |
| 45 |                                        |           |                                                                                                                                                                                                                                                                                                                                                                                                                                                   |       |
| 46 |                                        |           |                                                                                                                                                                                                                                                                                                                                                                                                                                                   |       |
| 47 | Additional analyses                    | 16        | Describe methods of additional analyses if done, indicating which were pre-specified. This may include, but not be limited to, the following: <ul style="list-style-type: none"> <li>• Sensitivity or subgroup analyses;</li> <li>• Meta-regression analyses;</li> <li>• <i>Alternative formulations of the treatment network; and</i></li> <li>• <i>Use of alternative prior distributions for Bayesian analyses (if applicable).</i></li> </ul> | 17-18 |
| 48 |                                        |           |                                                                                                                                                                                                                                                                                                                                                                                                                                                   |       |
| 49 |                                        |           |                                                                                                                                                                                                                                                                                                                                                                                                                                                   |       |
| 50 |                                        |           |                                                                                                                                                                                                                                                                                                                                                                                                                                                   |       |
| 51 |                                        |           |                                                                                                                                                                                                                                                                                                                                                                                                                                                   |       |
| 52 |                                        |           |                                                                                                                                                                                                                                                                                                                                                                                                                                                   |       |
| 53 |                                        |           |                                                                                                                                                                                                                                                                                                                                                                                                                                                   |       |
| 54 |                                        |           |                                                                                                                                                                                                                                                                                                                                                                                                                                                   |       |
| 55 |                                        |           |                                                                                                                                                                                                                                                                                                                                                                                                                                                   |       |
| 56 |                                        |           |                                                                                                                                                                                                                                                                                                                                                                                                                                                   |       |
| 57 |                                        |           |                                                                                                                                                                                                                                                                                                                                                                                                                                                   |       |
| 58 |                                        |           |                                                                                                                                                                                                                                                                                                                                                                                                                                                   |       |
| 59 |                                        |           |                                                                                                                                                                                                                                                                                                                                                                                                                                                   |       |
| 60 |                                        |           |                                                                                                                                                                                                                                                                                                                                                                                                                                                   |       |



|    |                                          |           |                                                                                                                                                                                                                                                                                                                                                                                                                                                              |    |
|----|------------------------------------------|-----------|--------------------------------------------------------------------------------------------------------------------------------------------------------------------------------------------------------------------------------------------------------------------------------------------------------------------------------------------------------------------------------------------------------------------------------------------------------------|----|
| 1  | Study selection                          | 17        | Give numbers of studies screened, assessed for eligibility, and included in the review, with reasons for exclusions at each stage, ideally with a flow diagram.                                                                                                                                                                                                                                                                                              | NA |
| 2  |                                          |           |                                                                                                                                                                                                                                                                                                                                                                                                                                                              |    |
| 3  | <b>Presentation of network structure</b> | <b>S3</b> | Provide a network graph of the included studies to enable visualization of the geometry of the treatment network.                                                                                                                                                                                                                                                                                                                                            | NA |
| 4  |                                          |           |                                                                                                                                                                                                                                                                                                                                                                                                                                                              |    |
| 5  | <b>Summary of network geometry</b>       | <b>S4</b> | Provide a brief overview of characteristics of the treatment network. This may include commentary on the abundance of trials and randomized patients for the different interventions and pairwise comparisons in the network, gaps of evidence in the treatment network, and potential biases reflected by the network structure.                                                                                                                            | NA |
| 6  |                                          |           |                                                                                                                                                                                                                                                                                                                                                                                                                                                              |    |
| 7  |                                          |           |                                                                                                                                                                                                                                                                                                                                                                                                                                                              |    |
| 8  |                                          |           |                                                                                                                                                                                                                                                                                                                                                                                                                                                              |    |
| 9  |                                          |           |                                                                                                                                                                                                                                                                                                                                                                                                                                                              |    |
| 10 |                                          |           |                                                                                                                                                                                                                                                                                                                                                                                                                                                              |    |
| 11 | Study characteristics                    | 18        | For each study, present characteristics for which data were extracted (e.g., study size, PICOS, follow-up period) and provide the citations.                                                                                                                                                                                                                                                                                                                 | NA |
| 12 |                                          |           |                                                                                                                                                                                                                                                                                                                                                                                                                                                              |    |
| 13 |                                          |           |                                                                                                                                                                                                                                                                                                                                                                                                                                                              |    |
| 14 | Risk of bias within studies              | 19        | Present data on risk of bias of each study and, if available, any outcome level assessment.                                                                                                                                                                                                                                                                                                                                                                  | NA |
| 15 |                                          |           |                                                                                                                                                                                                                                                                                                                                                                                                                                                              |    |
| 16 |                                          |           |                                                                                                                                                                                                                                                                                                                                                                                                                                                              |    |
| 17 | Results of individual studies            | 20        | For all outcomes considered (benefits or harms), present, for each study: 1) simple summary data for each intervention group, and 2) effect estimates and confidence intervals. <i>Modified approaches may be needed to deal with information from larger networks.</i>                                                                                                                                                                                      | NA |
| 18 |                                          |           |                                                                                                                                                                                                                                                                                                                                                                                                                                                              |    |
| 19 |                                          |           |                                                                                                                                                                                                                                                                                                                                                                                                                                                              |    |
| 20 |                                          |           |                                                                                                                                                                                                                                                                                                                                                                                                                                                              |    |
| 21 |                                          |           |                                                                                                                                                                                                                                                                                                                                                                                                                                                              |    |
| 22 | Synthesis of results                     | 21        | Present results of each meta-analysis done, including confidence/credible intervals. <i>In larger networks, authors may focus on comparisons versus a particular comparator (e.g. placebo or standard care), with full findings presented in an appendix. League tables and forest plots may be considered to summarize pairwise comparisons.</i> If additional summary measures were explored (such as treatment rankings), these should also be presented. | NA |
| 23 |                                          |           |                                                                                                                                                                                                                                                                                                                                                                                                                                                              |    |
| 24 |                                          |           |                                                                                                                                                                                                                                                                                                                                                                                                                                                              |    |
| 25 |                                          |           |                                                                                                                                                                                                                                                                                                                                                                                                                                                              |    |
| 26 |                                          |           |                                                                                                                                                                                                                                                                                                                                                                                                                                                              |    |
| 27 |                                          |           |                                                                                                                                                                                                                                                                                                                                                                                                                                                              |    |
| 28 |                                          |           |                                                                                                                                                                                                                                                                                                                                                                                                                                                              |    |
| 29 |                                          |           |                                                                                                                                                                                                                                                                                                                                                                                                                                                              |    |
| 30 |                                          |           |                                                                                                                                                                                                                                                                                                                                                                                                                                                              |    |
| 31 | <b>Exploration for inconsistency</b>     | <b>S5</b> | Describe results from investigations of inconsistency. This may include such information as measures of model fit to compare consistency and inconsistency models, <i>P</i> values from statistical tests, or summary of inconsistency estimates from different parts of the treatment network.                                                                                                                                                              | NA |
| 32 |                                          |           |                                                                                                                                                                                                                                                                                                                                                                                                                                                              |    |
| 33 |                                          |           |                                                                                                                                                                                                                                                                                                                                                                                                                                                              |    |
| 34 |                                          |           |                                                                                                                                                                                                                                                                                                                                                                                                                                                              |    |
| 35 |                                          |           |                                                                                                                                                                                                                                                                                                                                                                                                                                                              |    |
| 36 | Risk of bias across studies              | 22        | Present results of any assessment of risk of bias across studies for the evidence base being studied.                                                                                                                                                                                                                                                                                                                                                        | NA |
| 37 |                                          |           |                                                                                                                                                                                                                                                                                                                                                                                                                                                              |    |
| 38 | Results of additional analyses           | 23        | Give results of additional analyses, if done (e.g., sensitivity or subgroup analyses, meta-regression analyses, <i>alternative network geometries studied, alternative choice of prior distributions for Bayesian analyses</i> , and so forth).                                                                                                                                                                                                              | NA |
| 39 |                                          |           |                                                                                                                                                                                                                                                                                                                                                                                                                                                              |    |
| 40 |                                          |           |                                                                                                                                                                                                                                                                                                                                                                                                                                                              |    |
| 41 |                                          |           |                                                                                                                                                                                                                                                                                                                                                                                                                                                              |    |
| 42 |                                          |           |                                                                                                                                                                                                                                                                                                                                                                                                                                                              |    |
| 43 |                                          |           |                                                                                                                                                                                                                                                                                                                                                                                                                                                              |    |
| 44 |                                          |           |                                                                                                                                                                                                                                                                                                                                                                                                                                                              |    |
| 45 |                                          |           |                                                                                                                                                                                                                                                                                                                                                                                                                                                              |    |
| 46 |                                          |           |                                                                                                                                                                                                                                                                                                                                                                                                                                                              |    |
| 47 |                                          |           |                                                                                                                                                                                                                                                                                                                                                                                                                                                              |    |
| 48 |                                          |           |                                                                                                                                                                                                                                                                                                                                                                                                                                                              |    |
| 49 |                                          |           |                                                                                                                                                                                                                                                                                                                                                                                                                                                              |    |
| 50 |                                          |           |                                                                                                                                                                                                                                                                                                                                                                                                                                                              |    |
| 51 |                                          |           |                                                                                                                                                                                                                                                                                                                                                                                                                                                              |    |
| 52 |                                          |           |                                                                                                                                                                                                                                                                                                                                                                                                                                                              |    |
| 53 |                                          |           |                                                                                                                                                                                                                                                                                                                                                                                                                                                              |    |
| 54 |                                          |           |                                                                                                                                                                                                                                                                                                                                                                                                                                                              |    |
| 55 |                                          |           |                                                                                                                                                                                                                                                                                                                                                                                                                                                              |    |
| 56 |                                          |           |                                                                                                                                                                                                                                                                                                                                                                                                                                                              |    |
| 57 |                                          |           |                                                                                                                                                                                                                                                                                                                                                                                                                                                              |    |
| 58 |                                          |           |                                                                                                                                                                                                                                                                                                                                                                                                                                                              |    |
| 59 |                                          |           |                                                                                                                                                                                                                                                                                                                                                                                                                                                              |    |
| 60 |                                          |           |                                                                                                                                                                                                                                                                                                                                                                                                                                                              |    |

1  
2  
3  
4  
5  
6  
7  
8  
9  
10  
11  
12  
13  
14  
15  
16  
17  
18  
19  
20  
21  
22  
23  
24  
25  
26  
27  
28  
29  
30  
31  
32  
33  
34  
35  
36  
37  
38  
39  
40  
41  
42  
43  
44  
45  
46  
47  
48  
49  
50  
51  
52  
53  
54  
55  
56  
57  
58  
59  
60**DISCUSSION**

|                     |    |                                                                                                                                                                                                                                                                                                                                                                                                                                |    |
|---------------------|----|--------------------------------------------------------------------------------------------------------------------------------------------------------------------------------------------------------------------------------------------------------------------------------------------------------------------------------------------------------------------------------------------------------------------------------|----|
| Summary of evidence | 24 | Summarize the main findings, including the strength of evidence for each main outcome; consider their relevance to key groups (e.g., healthcare providers, users, and policy-makers).                                                                                                                                                                                                                                          | NA |
| Limitations         | 25 | Discuss limitations at study and outcome level (e.g., risk of bias), and at review level (e.g., incomplete retrieval of identified research, reporting bias). <i>Comment on the validity of the assumptions, such as transitivity and consistency. Comment on any concerns regarding network geometry (e.g., avoidance of certain comparisons).</i>                                                                            | 3  |
| Conclusions         | 26 | Provide a general interpretation of the results in the context of other evidence, and implications for future research.                                                                                                                                                                                                                                                                                                        | NA |
| <b>FUNDING</b>      |    |                                                                                                                                                                                                                                                                                                                                                                                                                                | 19 |
| Funding             | 27 | Describe sources of funding for the systematic review and other support (e.g., supply of data); role of funders for the systematic review. This should also include information regarding whether funding has been received from manufacturers of treatments in the network and/or whether some of the authors are content experts with professional conflicts of interest that could affect use of treatments in the network. |    |

PICOS = population, intervention, comparators, outcomes, study design.

\* Text in italics indicates wording specific to reporting of network meta-analyses that has been added to guidance from the PRISMA statement.

† Authors may wish to plan for use of appendices to present all relevant information in full detail for items in this

**SUPPLEMENTARY FILE 2:**

**Complete database search strategy**

Supplementary Table 1: Search strategy for databases EMBASE, APA PsycInfo, MEDLINE, Cochrane CENTRAL, searched through the Ovid platform.

|           | <b>Search terms</b>                                                                                                                                                                                                                                                |
|-----------|--------------------------------------------------------------------------------------------------------------------------------------------------------------------------------------------------------------------------------------------------------------------|
| <b>1</b>  | multiple sclerosis.ti,ab.                                                                                                                                                                                                                                          |
| <b>2</b>  | exp multiple sclerosis/                                                                                                                                                                                                                                            |
| <b>3</b>  | 1 or 2                                                                                                                                                                                                                                                             |
| <b>4</b>  | exp depression/                                                                                                                                                                                                                                                    |
| <b>5</b>  | (depress* or mood disorder or despair or misery or unhappiness or dysthymia or dysphor* or seasonal affective disorder or affective disorder or sadness or loss of pleasure).ti,ab.                                                                                |
| <b>6</b>  | 4 or 5                                                                                                                                                                                                                                                             |
| <b>7</b>  | exp randomized controlled trial/                                                                                                                                                                                                                                   |
| <b>8</b>  | ("random* control* trial*" or RCT or "random-allocation*" or "random allocation*" or "double-blind*" or "double blind*" or "single-blind*" or "single blind*" or mask* or random* or "control* stud*" or "control* clinical trial*" or "comparative stud*").ti,ab. |
| <b>9</b>  | 7 or 8                                                                                                                                                                                                                                                             |
| <b>10</b> | 3 AND 6 AND 9                                                                                                                                                                                                                                                      |

Supplementary Table 2: Search strategy for databases CINAHL through the Scopus platform\*, and Web of Science searched through the Web of Science platform\*.

|          | <b>Search Term</b>                                                                                                                                                                                                                                          |
|----------|-------------------------------------------------------------------------------------------------------------------------------------------------------------------------------------------------------------------------------------------------------------|
| <b>1</b> | “multiple sclerosis”                                                                                                                                                                                                                                        |
| <b>2</b> | depress* or “mood disorder*” or despair or misery or unhappiness or dysthymia or dysphor* or “seasonal affective disorder” or “affective disorder” or sadness or “loss of pleasure”                                                                         |
| <b>3</b> | ("random* control* trial*" or RCT or "random-allocation*" or "random allocation*" or "double-blind*" or "double blind*" or "single-blind*" or "single blind*" or mask* or random* or "control* stud*" or "control* clinical trial*" or "comparative stud*") |
| <b>4</b> | 1 AND 2 AND 3                                                                                                                                                                                                                                               |

\*The search strategy for Scopus platform and Web of Science platform is the same.

Supplementary Table 3: Search strategy for PEDro database.

|          | <b>Search line</b>                |
|----------|-----------------------------------|
| <b>1</b> | “multiple sclerosis” and depress* |

For peer review only
