# Supplementary material for: Comparing the effectiveness, safety and tolerability of interventions for depressive symptoms in people with multiple sclerosis: a systematic review and network meta-analysis protocol
Source: PubMed Central journal article supplement — BMJ Open. 2022 Jun 9;12(6):e055796. doi: 10.1136/bmjopen-2021-055796 (PMC9185417; doi:10.1136/bmjopen-2021-055796), 2022-06-09
Supplement: bmjopen-2021-055796supp002.pdf [file bmjopen-2021-055796supp002.pdf]

**SUPPLEMENTARY FILE 2:****Complete database search strategy**

Supplementary Table 1: Search strategy for databases EMBASE, APA PsycInfo,

MEDLINE, Cochrane CENTRAL, searched through the Ovid platform.

|           | <b>Search terms</b>                                                                                                                                                                                                                                                |
|-----------|--------------------------------------------------------------------------------------------------------------------------------------------------------------------------------------------------------------------------------------------------------------------|
| <b>1</b>  | multiple sclerosis.ti,ab.                                                                                                                                                                                                                                          |
| <b>2</b>  | exp multiple sclerosis/                                                                                                                                                                                                                                            |
| <b>3</b>  | 1 or 2                                                                                                                                                                                                                                                             |
| <b>4</b>  | exp depression/                                                                                                                                                                                                                                                    |
| <b>5</b>  | (depress* or mood disorder or despair or misery or unhappiness or dysthymia or dysphor* or seasonal affective disorder or affective disorder or sadness or loss of pleasure).ti,ab.                                                                                |
| <b>6</b>  | 4 or 5                                                                                                                                                                                                                                                             |
| <b>7</b>  | exp randomized controlled trial/                                                                                                                                                                                                                                   |
| <b>8</b>  | ("random* control* trial*" or RCT or "random-allocation*" or "random allocation*" or "double-blind*" or "double blind*" or "single-blind*" or "single blind*" or mask* or random* or "control* stud*" or "control* clinical trial*" or "comparative stud*").ti,ab. |
| <b>9</b>  | 7 or 8                                                                                                                                                                                                                                                             |
| <b>10</b> | 3 AND 6 AND 9                                                                                                                                                                                                                                                      |

## Supplementary Table 2: Search strategy for databases CINAHL through the Scopus

platform\*, and Web of Science searched through the Web of Science platform\*.

| <b>Search Term</b> |                                                                                                                                                                                                                                                             |
|--------------------|-------------------------------------------------------------------------------------------------------------------------------------------------------------------------------------------------------------------------------------------------------------|
| <b>1</b>           | “multiple sclerosis”                                                                                                                                                                                                                                        |
| <b>2</b>           | depress* or “mood disorder*” or despair or misery or unhappiness or dysthymia or dysphor* or “seasonal affective disorder” or “affective disorder” or sadness or “loss of pleasure”                                                                         |
| <b>3</b>           | ("random* control* trial*" or RCT or "random-allocation*" or "random allocation*" or "double-blind*" or "double blind*" or "single-blind*" or "single blind*" or mask* or random* or "control* stud*" or "control* clinical trial*" or "comparative stud*") |
| <b>4</b>           | 1 AND 2 AND 3                                                                                                                                                                                                                                               |

\*The search strategy for Scopus platform and Web of Science platform is the same.

Supplementary Table 3: Search strategy for PEDro database.

|          | <b>Search line</b>                |
|----------|-----------------------------------|
| <b>1</b> | “multiple sclerosis” and depress* |
